# Supplementary material for: Cobalt(iii)-catalyzed redox-neutral [4+2]-annulation of N-chlorobenzamides/acrylamides with alkylidenecyclopropanes at room temperature
Source: Royal Society of Chemistry journal article supplement (doi:10.1039/d1cc00654a), 2021-01-01

**Cobalt(III)-catalyzed redox-neutral [4+2]-annulation of  
*N*-chlorobenzamides/acrylamides with alkylidenecyclopropanes at room  
temperature**

Balu Ramesh and Masilamani Jeganmohan\*

Department of Chemistry, Indian Institute of Technology, Madras-600036, India

Email: [mjeganmohan@iitm.ac.in](mailto:mjeganmohan@iitm.ac.in)

**Electronic Supplementary Information (ESI)**

**Table of Contents**

|                                                                         |         |
|-------------------------------------------------------------------------|---------|
| Experimental Section                                                    | S2-S3   |
| Optimization Studies                                                    | S3-S4   |
| Mechanistic Studies                                                     | S4-S9   |
| X-Ray analysis                                                          | S10-S11 |
| References                                                              | S12     |
| Spectral Data of all Compounds                                          | S13-S26 |
| Copies of $^1\text{H}$ and $^{13}\text{C}$ NMR Spectra of All Compounds | S27-S83 |

## Experimental Section

**General information:** All reactions were carried out under the N<sub>2</sub> atmosphere in flame-dried glassware. Syringes which were used to transfer anhydrous solvents or reagents were purged with nitrogen prior to use (three times). Dry solvents are used for the reaction. Column chromatographically purifications were performed using SiO<sub>2</sub> (120- 200 mesh ASTM) from Merck if not indicated otherwise. Abbreviations for signal coupling are as follows: s, singlet; d, doublet; t, triplet; q, quartet; m, multiplet. Starting Materials: Amides<sup>1</sup>, Alkylidenecyclopropanes<sup>2</sup> and CoCp\*COI<sub>2</sub><sup>3</sup> were prepared according to the literature procedures. Commercially available metal salts and other chemicals were purchased from Sigma-Aldrich and Spectrochem. Pvt. Ltd., India and used without further purification.

### General Procedure for the synthesis of Alkylidenecyclopropanes 2:

The procedure was adapted from literature.<sup>2</sup>

3-Bromopropylphosphonium bromide (2.79 g, 6 mmol, 1.2 equiv) was dissolved in dry THF (10 mL) and *t*-BuOK (1.35 g, 12 mmol, 2.4 equiv) was added as a solution in dry THF (10 mL). The resulting suspension was heated at reflux for 10 minutes and substituted benzaldehyde (5 mmol, 1 equiv) was added as a solution in dry THF (5 mL). The mixture was heated at reflux for 2 h. After cooling down to room temperature, the mixture was layered with cyclohexane (20 mL) and the cloudy suspension filtered over Celite washing thoroughly with cyclohexane. The filtrate was concentrated and the residue purified by chromatography on silica gel eluting with cyclohexane to afford substituted alkylidenecyclopropane.

### General Procedure for the Synthesis of 3,4-Dihydroisoquinolinones 3:

A 15-mL pressure tube with septum containing CoCp\*COI<sub>2</sub> (10 mol %) and amides **1** (50 mg, 1.0 equiv), alkylidenecyclopropanes **2** (1.5 equiv), AgOAc (20 mol %) and NaOAc (1.0 equiv) was evacuated and purged with nitrogen gas three times. Followed by solvent 2,2,2- trifluoroethanol (1.5 mL) is added to pressure tube *via* syringe and again the reaction mixture was evacuated and purged with nitrogen gas three times. Then rubber septum was taken out and screw cap was used to cover the tube. The reaction mixture was allowed to stir at rt for 24 h. Then the reaction mixture was diluted with CH<sub>2</sub>Cl<sub>2</sub>, filtered through celite and the filtrate concentrated. The crude residue was purified through a silica gel column using hexane and ethyl acetate as eluent to give pure dihydroisoquinolinones **3**.

### General procedure for the synthesis of Dihydroisoquinoline 6:

A solution of **3aa** (70 mg, 1.0 equiv) in THF (5 mL) protected under Argon was treated with LiAlH<sub>4</sub> (32 mg, 3.0 equiv), and the mixture heated at reflux for 8h. After cooling to ambient temperature water (1.0 mL) was poured into the reaction mixture, then stirred for 10 min at rt and treated with NaOH (0.5 mL of 2 M aqueous solution), stirred for 5 min and diluted with additional water (5 mL). The solution was extracted with ethyl acetate (10 mL×2), the combined organic layer were dried (Na<sub>2</sub>SO<sub>4</sub>), filtered, concentrated under vacuum. The purification was performed by flash column chromatography on basic alumina using ethyl acetate/petroleum ether (v/v, 1:1) as eluent to give the product **6** as pale yellow gel (53 mg, 79%).

### General procedure for the synthesis of 1-Chloro Dihydroisoquinolines **7**:

Dihydroisoquinolinone **3** (0.070, 1.0 equiv) was dissolved in dry toluene (3 mL) before freshly distilled phosphoryl trichloride (0.13 mL, 6.8 equiv) was added dropwise *via* syringe to the stirred mixture. The reaction mixture was allowed to stir at 90 °C for 2 h. After cooling to ambient temperature the solvent was removed under vacuum. The resulting residue was cooled to -30 °C and a mixture of Et<sub>2</sub>O/Et<sub>3</sub>N 5% was added dropwise to the flask. The mixture was then stirred at room temperature for 10 minutes. Finally, it was filtered over basic alumina, eluting with Et<sub>2</sub>O/Et<sub>3</sub>N 5%. The filtrate was concentrated under reduced pressure to give the desired 1-chloro dihydroisoquinoline **7**.

**Table S1. Optimization of the Cyclization Reaction.**

| entry    | catalyst                      | solvent                              | additive                        | Base                           | yield (%) <sup>b</sup> |
|----------|-------------------------------|--------------------------------------|---------------------------------|--------------------------------|------------------------|
| 1        | Cp*Co(CO)I <sub>2</sub>       | TFE                                  | -                               | NaOAc (1 equiv)                | 75                     |
| <b>2</b> | <b>Cp*Co(CO)I<sub>2</sub></b> | <b>TFE</b>                           | <b>AgOAc (20 mol %)</b>         | <b>NaOAc (1 equiv)</b>         | <b>90</b>              |
| 5        | Cp*Co(CO)I <sub>2</sub>       | TFE                                  | Ag <sub>2</sub> O (20 mol %)    | NaOAc (1 equiv)                | 87                     |
| 6        | Cp*Co(CO)I <sub>2</sub>       | TFE                                  | Cu(OAc) <sub>2</sub> (20 mol %) | NaOAc (1 equiv)                | 80                     |
| 7        | Cp*Co(CO)I <sub>2</sub>       | TFE                                  | AgOAc (20 mol %)                | LiOAc (1 equiv)                | 62                     |
| 8        | Cp*Co(CO)I <sub>2</sub>       | TFE                                  | AgOAc (20 mol %)                | KOAc (1 equiv)                 | 69                     |
| 9        | Cp*Co(CO)I <sub>2</sub>       | TFE                                  | AgOAc (20 mol %)                | CsOAc (1 equiv)                | 45                     |
| 10       | Cp*Co(CO)I <sub>2</sub>       | TFE                                  | AgOAc (20 mol %)                | K <sub>2</sub> CO <sub>3</sub> | 15                     |
| 11       | Cp*Co(CO)I <sub>2</sub>       | TFE                                  | AgOAc (20 mol %)                | K <sub>3</sub> PO <sub>4</sub> | 10                     |
| 12       | Cp*Co(CO)I <sub>2</sub>       | ClCH <sub>2</sub> CH <sub>2</sub> Cl | AgOAc (20 mol %)                | NaOAc (1 equiv)                | 25                     |
| 13       | Cp*Co(CO)I <sub>2</sub>       | MeOH                                 | AgOAc (20 mol %)                | NaOAc (1 equiv)                | 45                     |
| 14       | Cp*Co(CO)I <sub>2</sub>       | THF                                  | AgOAc (20 mol %)                | NaOAc (1 equiv)                | 15                     |
| 15       | Cp*Co(CO)I <sub>2</sub>       | toluene                              | AgOAc (20 mol %)                | NaOAc (1 equiv)                | 10                     |
| 16       | -                             | TFE                                  | AgOAc (20 mol %)                | NaOAc (1 equiv)                | NR                     |

<sup>a</sup>All reactions were carried out using **1** (50 mg, 1 equiv), **2** (1.5 equiv), CoCp\*COI<sub>2</sub> (10 mol %), AgOAc (20 mol %), NaOAc (1 equiv) in TFE (1.5 mL) under N<sub>2</sub> at rt for 24 h. <sup>b</sup>Isolated yield of **3**.

In the reaction, a catalytic amount of AgOAc plays a crucial role to increase the yield of the product **3aa**. Notably, in the absence of AgOAc, the reaction offered the product **3aa** in only 75% yield. It is expected that the AgOAc acts as a halogen scavenger to form a cobalt acetate species. The reaction was examined with *N*-alkoxy benzamides (**4a-b**). However, in the reaction, no expected cyclization product **3aa** was formed due to energy constraints. Among the silver salts used, AgOAc offered a better conversion as compared with other salts like Ag<sub>2</sub>O and Cu(OAc)<sub>2</sub>. The reaction was examined with various bases such as LiOAc, NaOAc, KOAc, CsOAc, K<sub>2</sub>CO<sub>3</sub> and K<sub>3</sub>PO<sub>4</sub>.

Among them, NaOAc was very effective, affording the product **3aa** in 90% yield. LiOAc, KOAc and CsOAc were partially effective, giving the product **3aa** in 45-69% yields. K<sub>2</sub>CO<sub>3</sub> and K<sub>3</sub>PO<sub>4</sub> were less effective for the reaction. The cyclization reaction was further investigated with various solvents such as TFE, THF, toluene, ClCH<sub>2</sub>CH<sub>2</sub>Cl and MeOH. Among them, TFE was very effective, providing the product **3aa** in 90% yield. The other solvents such as THF, ClCH<sub>2</sub>CH<sub>2</sub>Cl, toluene and MeOH were less effective for the reaction.

## Mechanistic Studies

### Deuterium Studies

To a 15-mL pressure tube containing CoCp\*COI<sub>2</sub> (10 mol %), amide **1a** (50 mg, 1.0 equiv), AgOAc (20 mol %) and NaOAc (1.0 equiv) was evacuated and purged with N<sub>2</sub> gas three times. To the tube were then added 1,2-dichloroethane (1.5 mL) solvent *via* syringe. D<sub>2</sub>O (10.0 equiv) were added via syringes and again the reaction mixture was evacuated and purged with nitrogen gas three times. Then the septum was taken out and immediately screw cap was used to cover the tube. Then, the reaction mixture was allowed to stir at rt for 24 h. Then the reaction mixture was diluted with CH<sub>2</sub>Cl<sub>2</sub>, filtered through celite and the filtrate concentrated. The crude residue was purified through a silica gel column using hexane and ethyl acetate as eluent to give product **D-1a**. In the reaction, product **D-1a** was observed in 48% yield with 68% of deuterium incorporation at the both *ortho* carbons of *N*-chlorobenzamide, respectively. These results also clearly reveal that the C-H bond activation as a key intermediate in the reaction as well as it is the reversible process.

### Preparation of Compounds **D-3ad**.

To a 15-mL pressure tube containing CoCp\*COI<sub>2</sub> (10 mol %), amide **1a** (50 mg, 1.0 equiv), alkylidenecyclopropane **2a** (1.5 equiv), AgOAc (20 mol %) and NaOAc (1.0 equiv) was evacuated and purged with N<sub>2</sub> gas three times. To the tube were then added 1,2-dichloroethane (1.5 mL) solvent *via* syringe. D<sub>2</sub>O (10.0 equiv) were added via syringes and again the reaction mixture was evacuated and purged with nitrogen gas three times. Then the septum was taken out and immediately screw cap was used to cover the tube. Then, the reaction mixture was allowed to stir at rt for 24 h. Then the reaction mixture was diluted with CH<sub>2</sub>Cl<sub>2</sub>, filtered through celite and the filtrate concentrated. The crude residue was purified through a silica gel column using hexane and ethyl acetate as eluent to give cyclized product **D-3ad**. In the reaction, cyclized product **D-3ad** was observed in 21% yield with 25% of deuterium incorporation at the *ortho* carbon along with the unreacted starting material **D-1a** were isolated in 38% yield.

$^1\text{H}$  NMR spectrum of compound **D-1a** ( $\text{CDCl}_3$  was used).

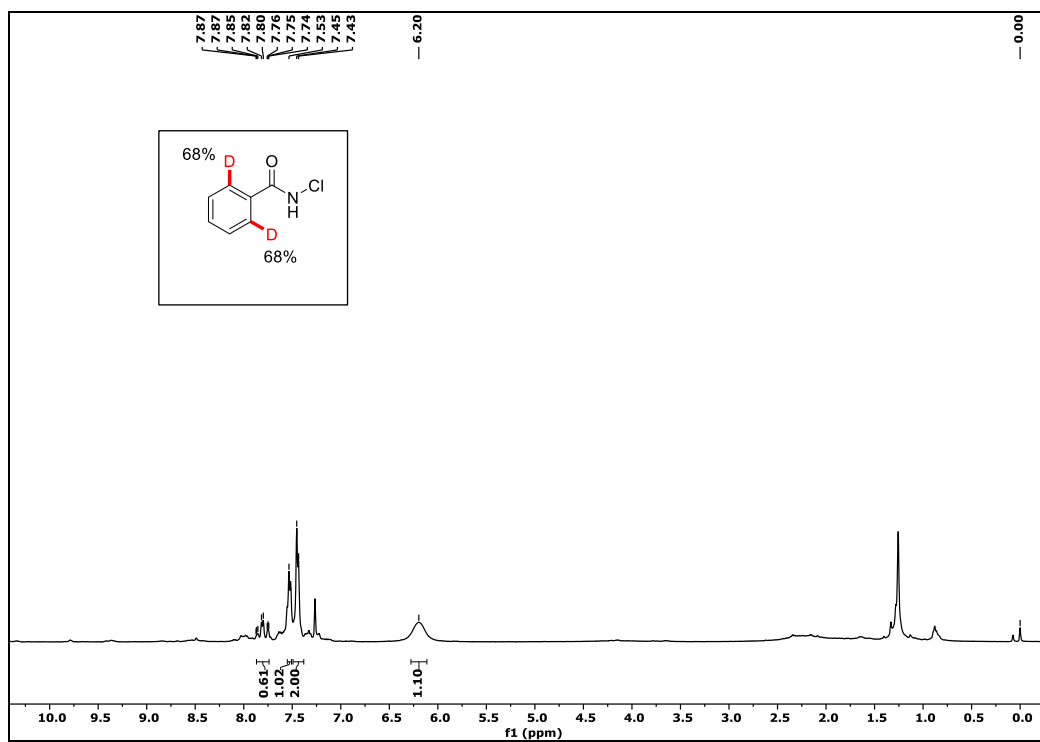

$^1\text{H}$  NMR spectrum of compound **D-3ad** ( $\text{CDCl}_3$  was used).

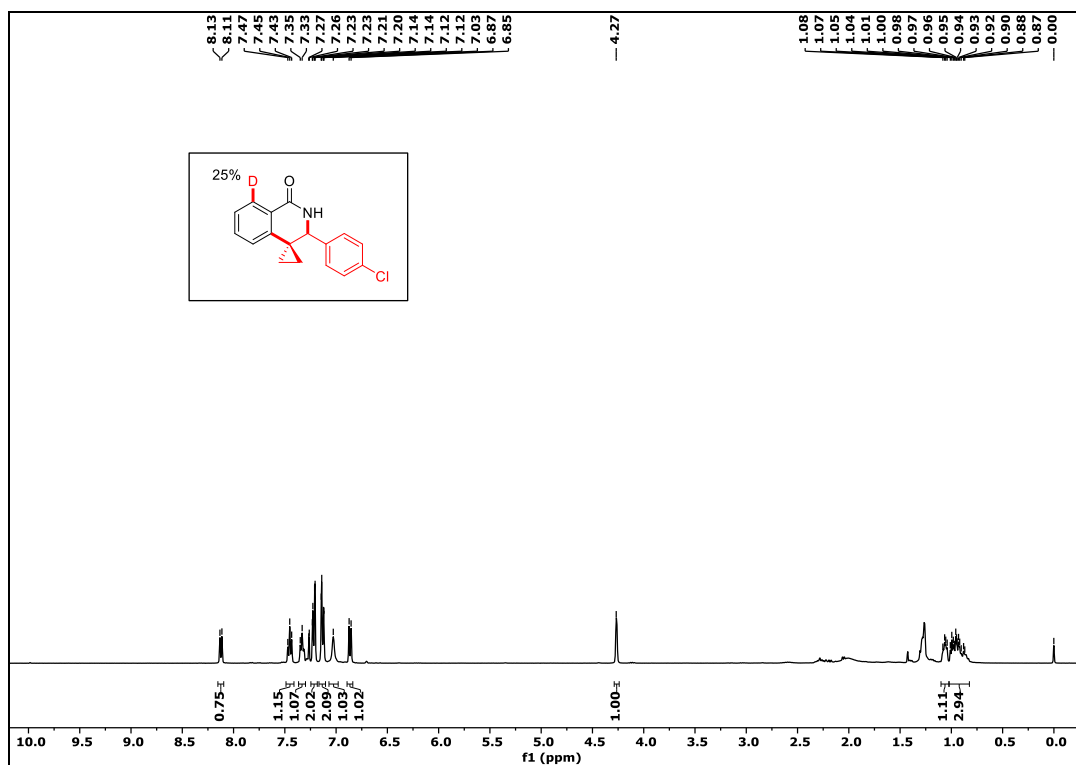

$^1\text{H}$  NMR spectrum of compound **D-1a** ( $\text{CDCl}_3$  was used).

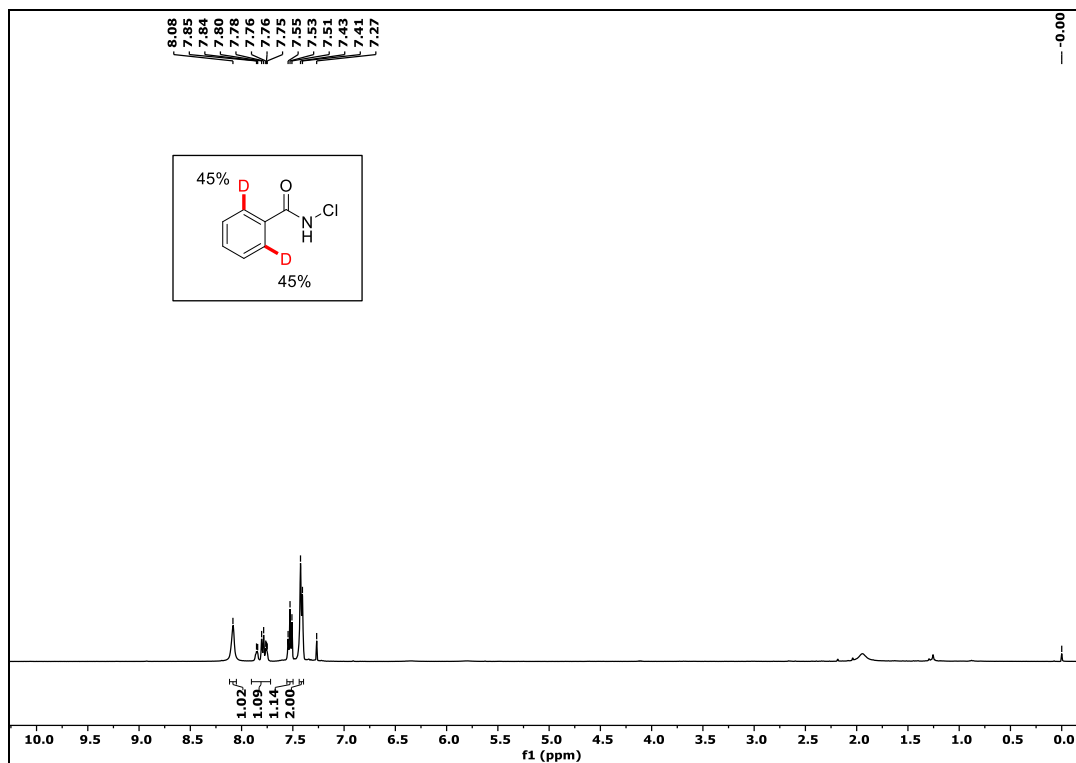

### Procedure for Competition Reaction between Amides.

To a 15-mL pressure tube containing CoCp\*COI<sub>2</sub> (10 mol %), amide **1j** (0.25 mmol, 1.0 equiv), amide **1k** (0.25 mmol, 1.0 equiv), alkylidenecyclopropane **2a** (0.25 mmol, 1.0 equiv), and NaOAc (1.0 equiv) was evacuated and purged with N<sub>2</sub> gas three times. To the tube were then added 2,2,2-trifluoroethanol solvent *via* syringe. After that, the tube was purged and evacuated with N<sub>2</sub> gas three times and screw cap was used to cover the tube. Then, the reaction mixture was allowed to stir at rt for 12 h. Then the reaction mixture was diluted with CH<sub>2</sub>Cl<sub>2</sub>, filtered through celite and the filtrate concentrated. The crude residue was purified through a silica gel column using hexane and ethyl acetate as eluent to give products **3ja** and **3ka** in 20% and 38% yields, respectively.

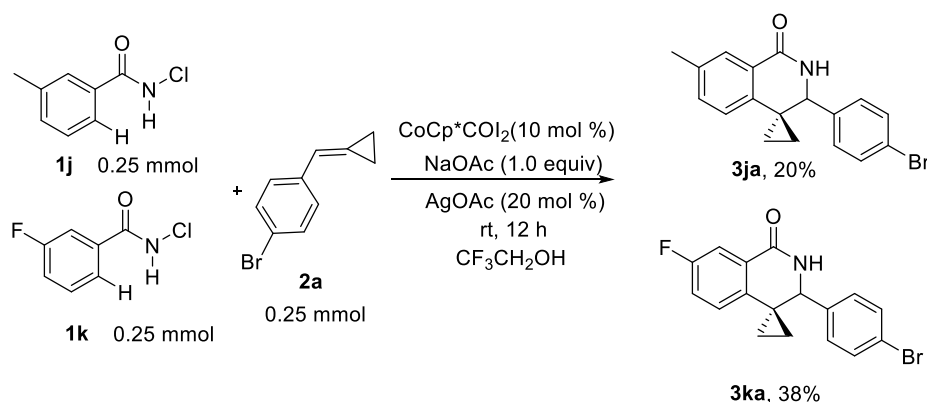

### Studies on the Kinetic Isotope Effect

#### (a) Competition Experiment using amide **1a** and [D]-**1a**.

To a 15mL pressure tube containing CoCp\*COI<sub>2</sub> (10 mol %), amides **1a** (50 mg, 1.0 equiv), and amide [D]-**1a** (50 mg, 1.0 equiv), alkylidenecyclopropane **2a** (0.25mmol, 1.0 equiv), AgOAc (20 mol%) and NaOAc (1.0 equiv) was evacuated and purged with N<sub>2</sub> gas three times. To the tube were then added 2,2,2-trifluoroethanol solvent *via* syringe. After that, the tube was purged and evacuated with N<sub>2</sub> gas three times and screw cap was used to cover the tube. Then, the reaction mixture was allowed to stir at rt for 24 h. Then the reaction mixture was allowing to reach rt and it was diluted with CH<sub>2</sub>Cl<sub>2</sub>, filtered through celite and the filtrate concentrated. The crude residue was purified through a silica gel column using hexane and ethyl acetate as eluent to give combined products **3aa** and [D]-**3aa** in 85% yields, respectively.

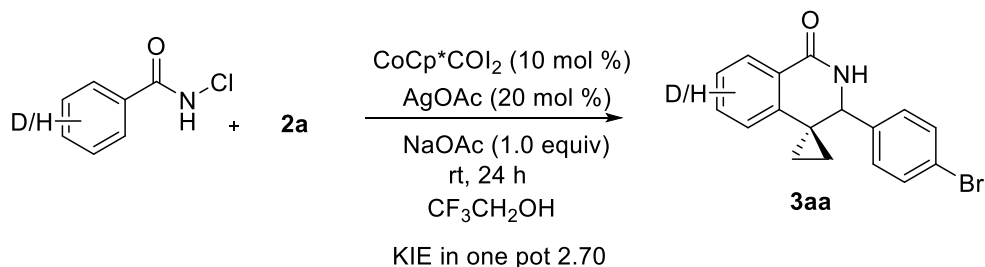

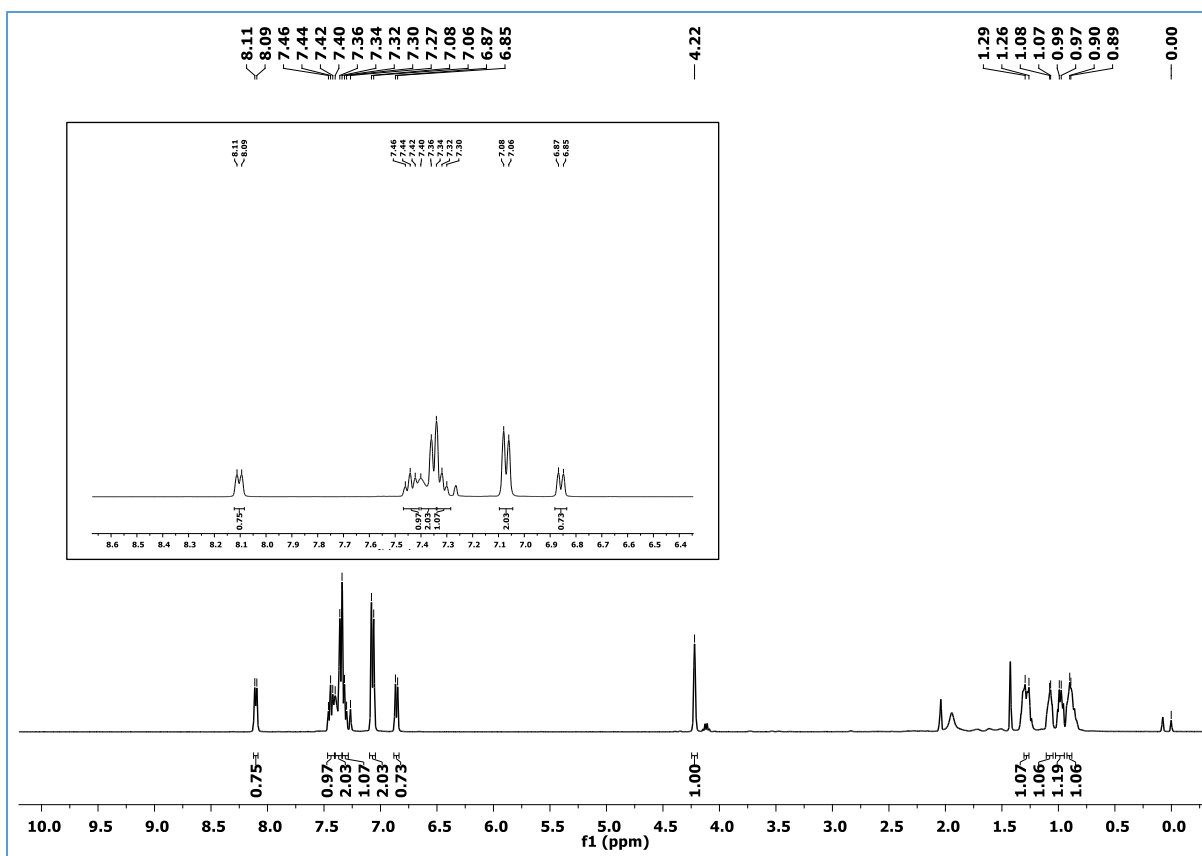

## b) By Two parallel reactions

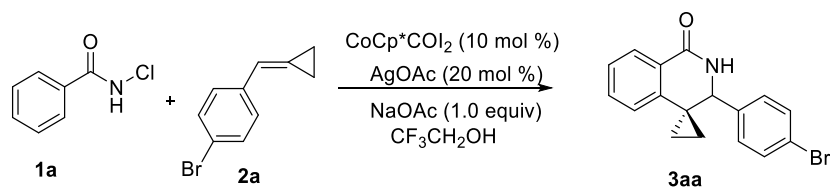

To a 15mL pressure tube containing CoCp\*COI<sub>2</sub> (10 mol %), amides **1a** (100 mg, 1.0 equiv), and alkylidenecyclopropane **2a** (1.5 equiv), AgOAc (20 mol%) and NaOAc (1.0 equiv) was evacuated and purged with N<sub>2</sub> gas three times. To the tube were then added 2,2,2-trifluoroethanol solvent *via* syringe. After that, the tube was purged and evacuated with N<sub>2</sub> gas three times and screw cap was used to cover the tube. For 120 min, an aliquot (0.1 mL) was removed by a syringe every 20 min and directly analyzed by <sup>1</sup>H-NMR. The yield of product was determined by <sup>1</sup>H NMR spectroscopy using CH<sub>2</sub>Br<sub>2</sub> as an internal standard.

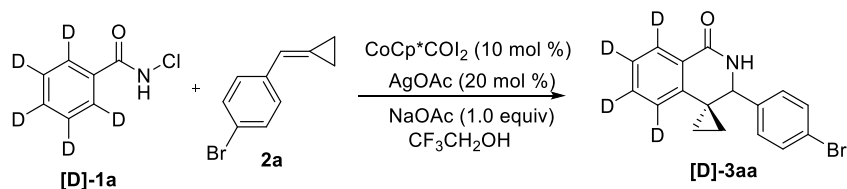



The procedure above was followed using **[D]-1a** (100 mg). Data from independent kinetic isotope studies are collected in the figure below and KIE was found to be  $k_H/k_D \approx 2.63$ .

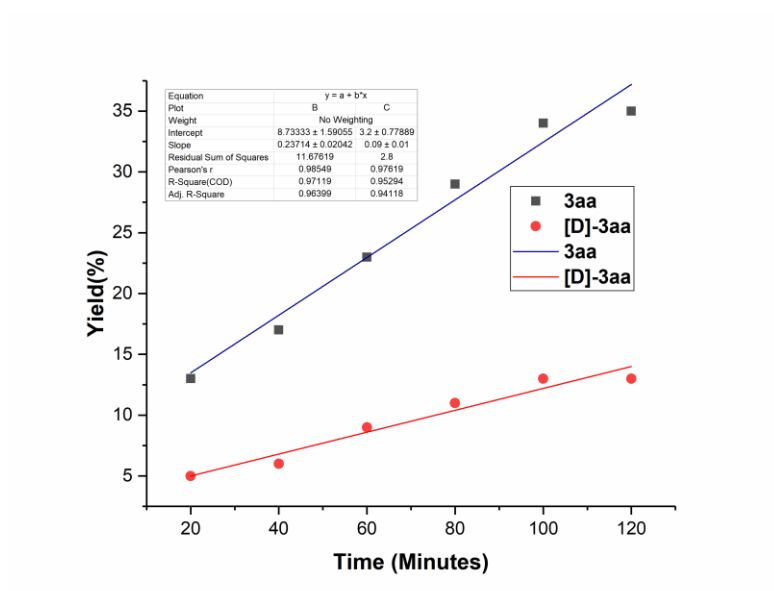

**Table S2. X-Ray Analysis of Compound 3aa.**

| <b>3aa</b>                                                             |                                      |
|------------------------------------------------------------------------|--------------------------------------|
| empirical formula                                                      | C <sub>18</sub> H <sub>16</sub> BrNO |
| formula wt                                                             | 342.23                               |
| temp (K)                                                               | 296                                  |
| Cryst. syst.                                                           | monoclinic                           |
| space group                                                            | P 2 <sub>1</sub> /c                  |
| <i>a</i> (Å)                                                           | 14.4966(16)                          |
| <i>b</i> (Å)                                                           | 10.4123(11)                          |
| <i>c</i> (Å)                                                           | 11.2334(10)                          |
| $\alpha$ (deg)                                                         | 90                                   |
| $\beta$ (deg)                                                          | 111.258(5)                           |
| $\gamma$ (deg)                                                         | 90                                   |
| <i>V</i> (Å <sup>3</sup> )                                             | 1580.2(3)                            |
| <i>Z</i>                                                               | 4                                    |
| $\rho_{\text{calcd}}$ (Mg m <sup>-3</sup> )                            | 1.439                                |
| $\mu$ (mm <sup>-1</sup> )                                              | 2.599                                |
| <i>F</i> (000)                                                         | 696.0                                |
| Cryst size (mm)                                                        | 0.25 × 0.22 × 0.1                    |
| $\theta$ range (deg)                                                   | 3.014 to 49.98                       |
| no. of collected/unique<br>rflns                                       | 9144/2783 [Rint = 0.0636]            |
| no.of. data /restraints/<br>params                                     | 2783/0/195                           |
| <i>R</i> 1, <i>wR</i> 2 ( <i>I</i> > 2 $\sigma$ ( <i>I</i> ))          | 0.0576, 0.0885                       |
| <i>R</i> 1, <i>wR</i> 2 (all data)                                     | 0.1245, 0.0947                       |
| GOF                                                                    | 1.674                                |
| $\Delta\rho_{\text{max}}/\Delta\rho_{\text{min}}$ (e Å <sup>-3</sup> ) | 0.66/-0.58                           |

**ORTEP Diagram of Compounds 3aa (CCDC No. 2041146).**

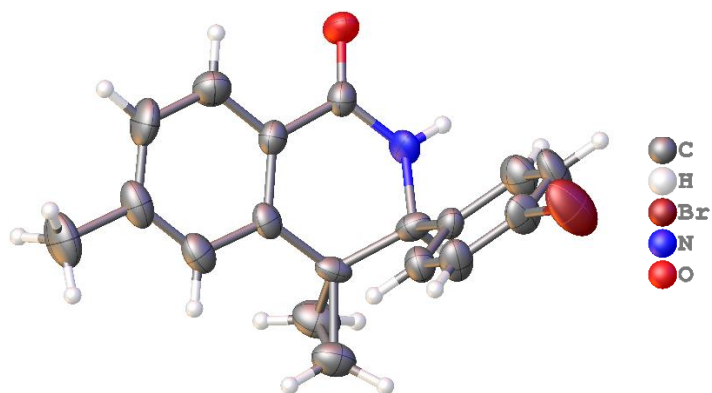

**3aa**

## References

1. X. Yu, K. Chen, S. Guo, P. Shi, C. Song and J. Zhu, *Org. Lett.*, 2017, **19**, 5348.
2. (a) Z.-Z. Zhu, K. Chen, L.-Z. Yu, X.-Y. Tang and M. Shi, *Org. Lett.*, 2015, **17**, 5994; (b) Y. Wang, M. E. Muratore, Z. Rong and A. M. Echavarren, *Angew. Chem. Int. Ed.*, 2014, **53**, 14022. (c) T. Kippo, K. Hamaoka and I. Ryu, *J. Am. Chem. Soc.*, 2013, **135**, 632.
3. B. Sun, T. Yoshino, S. Matsunaga and M. Kanai, *Adv. Synth. Catal.*, 2014, **356**, 1491.

## Spectral Data of all Compounds:

### 3'-(4-Bromophenyl)-2',3'-dihydro-1'*H*-spiro[cyclopropane-1,4'-isoquinolin]-1'-one (3aa).

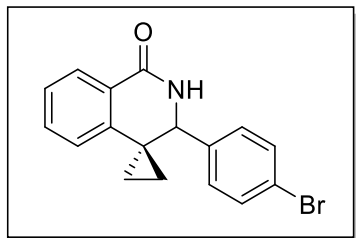

White Solid; eluent (12% ethyl acetate in hexane). The reaction scale is 50 mg (**1a**), 95 mg was isolated and yield is 90%. **<sup>1</sup>H NMR (400 MHz, CDCl<sub>3</sub>):** δ 8.11 (d, *J* = 7.7 Hz, 1H), 7.45 (t, *J* = 7.5 Hz, 1H), 7.34 (dd, *J* = 16.5, 8.0 Hz, 4H), 7.07 (d, *J* = 8.3 Hz, 2H), 6.86 (d, *J* = 7.8 Hz, 1H), 4.23 (d, *J* = 3.5 Hz, 1H), 1.36 – 1.28 (m, 1H), 1.13 – 1.04 (m, 1H), 0.99 (dd, *J* = 10.6, 4.8 Hz, 1H), 0.94 – 0.88 (m, 1H). **<sup>13</sup>C NMR (101 MHz, CDCl<sub>3</sub>):** δ 166.2, 141.3, 139.0, 133.1, 131.6, 129.1, 129.0, 128.2, 126.5, 122.0, 121.7, 61.5, 23.3, 18.0, 10.9.

**HRMS (ESI-TOF)** *m/z*: [M + H]<sup>+</sup> Calcd for C<sub>17</sub>H<sub>14</sub>BrNOH 328.0337; Found 328.0340.

### 3'-(4-Bromophenyl)-6'-methyl-2',3'-dihydro-1'*H*-spiro[cyclopropane-1,4'-isoquinolin]-1'-one (3ba).

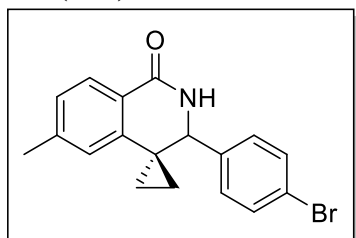

White Solid; eluent (12% ethyl acetate in hexane). The reaction scale is 50 mg (**1b**), 77 mg was isolated and yield is 77%. **<sup>1</sup>H NMR (500 MHz, CDCl<sub>3</sub>):** δ 7.97 (d, *J* = 7.9 Hz, 1H), 7.55 (d, *J* = 27.1 Hz, 1H), 7.33 (d, *J* = 8.4 Hz, 2H), 7.11 (d, *J* = 7.9 Hz, 1H), 7.06 (d, *J* = 8.5 Hz, 2H), 6.64 (s, 1H), 4.15 (d, *J* = 3.6 Hz, 1H), 2.34 (s, 3H), 1.32 (dt, *J* = 9.5, 5.9 Hz, 1H), 1.07 (ddd, *J* = 10.6, 6.1, 4.7 Hz, 1H), 0.96 (dt, *J* = 9.7, 6.1 Hz, 1H), 0.86 (ddd, *J* = 9.6, 6.5, 4.6 Hz, 1H). **<sup>13</sup>C NMR (126 MHz, CDCl<sub>3</sub>):** δ 166.4, 143.6, 141.2, 139.3, 131.5, 129.0, 129.0, 128.2, 127.3, 126.6, 122.3, 121.8, 61.6, 23.2, 21.9, 18.3, 10.6.

**HRMS (ESI-TOF)** *m/z*: [M + H]<sup>+</sup> Calcd for C<sub>18</sub>H<sub>16</sub>BrNOH 342.0494; Found 342.0493.

### 3'-(4-Bromophenyl)-6'-methoxy-2',3'-dihydro-1'*H*-spiro[cyclopropane-1,4'-isoquinolin]-1'-one (3cd + 3cd').

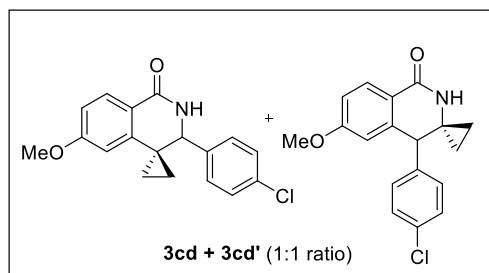

Pale yellow Solid; eluent (18% ethyl acetate in hexane). The reaction scale is 50 mg (**1c**), 51 mg was isolated and yield is 60%. **<sup>1</sup>H NMR (400 MHz, CDCl<sub>3</sub>)**: δ 8.13 (d, *J* = 1.6 Hz, 1H), 8.07 (d, *J* = 8.6 Hz, 1H), 7.25 – 7.19 (m, 4H), 7.12 (dd, *J* = 8.3, 4.6 Hz, 4H), 6.95 (s, 1H), 6.85 – 6.78 (m, 2H), 6.34 (d, *J* = 2.4 Hz, 1H), 6.31 (s, 1H), 4.21 (d, *J* = 3.5 Hz, 2H), 3.89 (s, 3H), 3.82 (s, 3H), 1.13 (dd, *J* = 9.9, 5.0 Hz, 1H), 1.04 (t, *J* = 8.2 Hz, 2H), 0.93 (tdd, *J* = 19.4, 10.5, 4.2 Hz, 5H). **<sup>13</sup>C NMR (101 MHz, CDCl<sub>3</sub>)**: δ 166.0, 164.9, 163.6, 158.7, 143.6, 142.0, 138.6, 138.2, 134.0, 133.8, 130.5, 130.3, 128.8, 128.7, 128.6, 128.5, 122.6, 122.0, 121.1, 111.2, 107.7, 104.8, 61.6, 56.2, 55.4, 23.8, 23.6, 18.2, 18.0, 11.3, 11.1.

**HRMS (ESI-TOF)** *m/z*: [*M* + *H*]<sup>+</sup> Calcd for C<sub>18</sub>H<sub>16</sub>ClNO<sub>2</sub>H 314.0948; Found 314.0944.

**3'-(4-Bromophenyl)-6'-fluoro-2',3'-dihydro-1'*H*-spiro[cyclopropane-1,4'-isoquinolin]-1'-one (3da).**

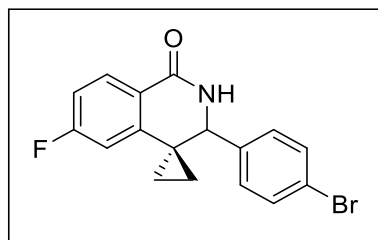

Pale yellow Solid; eluent (12% ethyl acetate in hexane). The reaction scale is 50 mg (**1d**), 76 mg was isolated and yield is 76%. **<sup>1</sup>H NMR (400 MHz, CDCl<sub>3</sub>)** δ 8.12 (dd, *J* = 8.5, 6.1 Hz, 1H), 7.39 (d, *J* = 8.3 Hz, 2H), 7.12 (s, 1H), 7.07 (d, *J* = 8.2 Hz, 2H), 6.99 (d, *J* = 2.0 Hz, 1H), 6.58 – 6.51 (m, 1H), 4.25 (d, *J* = 3.3 Hz, 1H), 1.28 – 1.20 (m, 1H), 1.15 – 1.08 (m, 1H), 1.07 – 0.99 (m, 1H), 0.94 (dd, *J* = 9.8, 4.6 Hz, 1H). **<sup>13</sup>C NMR (101 MHz, CDCl<sub>3</sub>)** δ 167.2, 165.0, 144.7, 138.6, 131.7, 131.1, 128.9, 125.4, 122.2, 113.8, 109.1, 61.4, 23.5, 18.1, 11.5.

**HRMS (ESI-TOF)** *m/z*: [*M* + *H*]<sup>+</sup> Calcd for C<sub>17</sub>H<sub>13</sub>BrFNOH 346.0243; Found 346.0234.

**3'-(4-Bromophenyl)-6'-chloro-2',3'-dihydro-1'*H*-spiro[cyclopropane-1,4'-isoquinolin]-1'-one (3ea).**

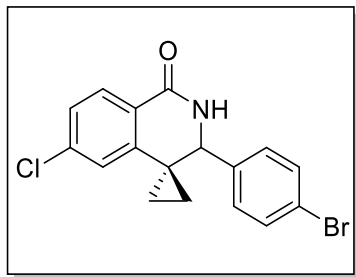

White Solid; eluent (12% ethyl acetate in hexane). The reaction scale is 50 mg (**1e**), 70 mg was isolated and yield is 74%. **<sup>1</sup>H NMR (400 MHz, CDCl<sub>3</sub>)**  $\delta$  8.03 (d,  $J$  = 8.3 Hz, 1H), 7.42 (s, 1H), 7.37 (d,  $J$  = 8.3 Hz, 2H), 7.29 (d,  $J$  = 8.3 Hz, 1H), 7.06 (d,  $J$  = 8.3 Hz, 2H), 6.83 (s, 1H), 4.22 (d,  $J$  = 3.5 Hz, 1H), 1.33 – 1.25 (m, 1H), 1.16 – 1.08 (m, 1H), 1.07 – 1.00 (m, 1H), 0.97 – 0.88 (m, 1H). **<sup>13</sup>C NMR (101 MHz, CDCl<sub>3</sub>)**  $\delta$  165.3, 143.3, 139.4, 138.6, 131.7, 129.8, 128.9, 127.7, 126.9, 122.1, 61.4, 23.4, 18.3, 11.2.

**HRMS (ESI-TOF)**  $m/z$ :  $[M + H]^+$  Calcd for C<sub>17</sub>H<sub>13</sub>BrClNOH 361.9947; Found 361.9948.

**6'-Bromo-3'-(4-bromophenyl)-2,3'-dihydro-1'H-spiro[cyclopropane-1,4'-isoquinolin]-1'-one (3fa).**

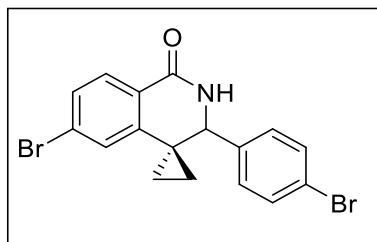

White Solid; eluent (12% ethyl acetate in hexane). The reaction scale is 50 mg (**1f**), 71 mg was isolated and yield is 81%. **<sup>1</sup>H NMR (400 MHz, CDCl<sub>3</sub>)**  $\delta$  7.95 (d,  $J$  = 8.3 Hz, 1H), 7.46 (d,  $J$  = 8.3 Hz, 1H), 7.38 (d,  $J$  = 8.4 Hz, 2H), 7.35 (s, 1H), 7.06 (d,  $J$  = 8.3 Hz, 2H), 6.99 (s, 1H), 4.21 (d,  $J$  = 3.5 Hz, 1H), 1.34 – 1.24 (m, 1H), 1.15 – 1.08 (m, 1H), 1.07 – 0.99 (m, 1H), 0.97 – 0.89 (m, 1H). **<sup>13</sup>C NMR (101 MHz, CDCl<sub>3</sub>)**  $\delta$  165.4, 143.4, 138.6, 131.7, 129.9, 129.9, 128.9, 128.1, 125.1, 122.2, 61.5, 23.4, 18.3, 11.3.

**HRMS (ESI-TOF)**  $m/z$ :  $[M + H]^+$  Calcd for C<sub>17</sub>H<sub>13</sub>Br<sub>2</sub>NOH 405.9442; Found 405.9443.

**3'-(4-Bromophenyl)-6'-iodo-2,3'-dihydro-1'H-spiro[cyclopropane-1,4'-isoquinolin]-1'-one (3ga).**

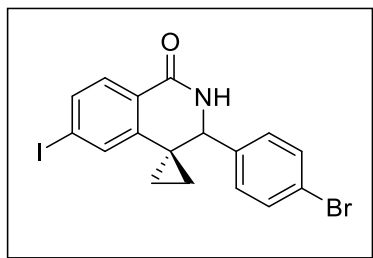

White Solid; eluent (12% ethyl acetate in hexane). The reaction scale is 50 mg (**1g**), 58 mg was isolated and yield is 73%. **<sup>1</sup>H NMR (400 MHz, CDCl<sub>3</sub>)**  $\delta$  7.79 (d,  $J$  = 8.2 Hz, 1H), 7.68 (d,  $J$  = 8.2 Hz, 1H), 7.37 (d,  $J$  = 8.1 Hz, 3H), 7.19 (s, 1H), 7.05 (d,  $J$  = 8.2 Hz, 2H), 4.19 (d,  $J$  = 3.4 Hz, 1H), 1.30 (dd,  $J$  = 10.2, 5.1 Hz, 1H), 1.15 – 1.07 (m, 1H), 1.02 (dd,  $J$  = 10.7, 4.8 Hz, 1H), 0.96 – 0.88 (m, 1H). **<sup>13</sup>C NMR (101 MHz, CDCl<sub>3</sub>)**  $\delta$  165.6, 143.2, 138.6, 135.9, 131.7, 131.0, 129.7, 128.9, 128.7, 122.2, 100.8, 61.5, 23.2, 18.3, 11.2.

**HRMS (ESI-TOF)**  $m/z$ :  $[M + H]^+$  Calcd for C<sub>17</sub>H<sub>13</sub>BrINO<sub>2</sub> 453.9303; Found 453.9290.

**3'-(4-Bromophenyl)-6'-nitro-2',3'-dihydro-1'H-spiro[cyclopropane-1,4'-isoquinolin]-1'-one (3ha).**

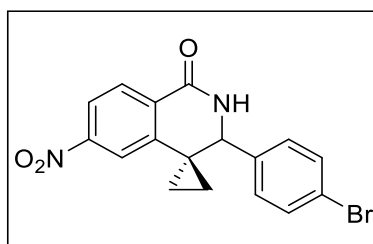

Yellow Solid; eluent (15% ethyl acetate in hexane). The reaction scale is 50 mg (**1h**), 75 mg was isolated and yield is 80%. **<sup>1</sup>H NMR (400 MHz, CDCl<sub>3</sub>)**  $\delta$  8.27 (d,  $J$  = 8.5 Hz, 1H), 8.14 (d,  $J$  = 8.5 Hz, 1H), 7.76 (s, 1H), 7.73 (s, 1H), 7.39 (d,  $J$  = 8.3 Hz, 2H), 7.07 (d,  $J$  = 8.3 Hz, 2H), 4.33 (d,  $J$  = 3.3 Hz, 1H), 1.44 (dt,  $J$  = 11.2, 5.4 Hz, 1H), 1.25 – 1.12 (m, 2H), 1.07 – 1.00 (m, 1H). **<sup>13</sup>C NMR (101 MHz, CDCl<sub>3</sub>)**  $\delta$  164.2, 150.8, 143.6, 138.0, 134.3, 131.9, 129.7, 128.8, 122.5, 121.4, 117.4, 61.2, 23.7, 18.6, 11.8.

**HRMS (ESI-TOF)**  $m/z$ :  $[M + Na]^+$  Calcd for C<sub>17</sub>H<sub>13</sub>BrN<sub>2</sub>O<sub>3</sub>Na 395.0007; Found 395.0008.

**3'-(4-Bromophenyl)-6'-(trifluoromethyl)-2',3'-dihydro-1'H-spiro[cyclopropane-1,4'-isoquinolin]-1'-one (3id).**

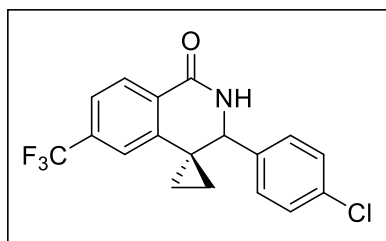



White Solid; eluent (15% ethyl acetate in hexane). The reaction scale is 50 mg (**1i**), 61 mg was isolated and yield is 78%. **<sup>1</sup>H NMR (400 MHz, CDCl<sub>3</sub>)** δ 8.25 (d, *J* = 8.1 Hz, 1H), 7.59 (d, *J* = 8.1 Hz, 1H), 7.26 (dd, *J* = 8.4, 1.7 Hz, 2H), 7.13 (s, 1H), 7.12 – 7.08 (m, 2H), 7.05 (d, *J* = 3.5 Hz, 1H), 4.33 (d, *J* = 3.4 Hz, 1H), 1.31 (dd, *J* = 10.6, 5.0 Hz, 1H), 1.13 – 1.09 (m, 1H), 1.03 – 0.96 (m, 1H), 0.90 – 0.84 (m, 1H). **<sup>13</sup>C NMR (101 MHz, CDCl<sub>3</sub>)** δ 165.0, 142.4, 137.9, 134.6 (q, *J*<sub>C-F</sub> = 32.8 Hz), 134.1, 132.2, 128.8, 128.5, 123.3 (q, *J*<sub>C-F</sub> = 3.8 Hz), 118.9 (q, *J*<sub>C-F</sub> = 3.8 Hz), 61.21, 23.45, 18.34, 11.32.

**HRMS (ESI-TOF)** *m/z*: [M + H]<sup>+</sup> Calcd for C<sub>18</sub>H<sub>13</sub>ClF<sub>3</sub>NO 352.0716; Found 352.0714.

**3'-(4-Bromophenyl)-7'-methyl-2',3'-dihydro-1'*H*-spiro[cyclopropane-1,4'-isoquinolin]-1'-one (3ja).**

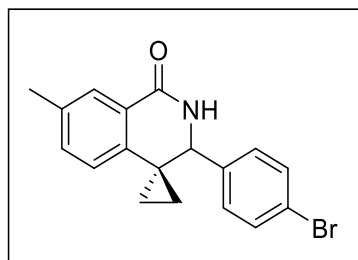

White Solid; eluent (12% ethyl acetate in hexane). The reaction scale is 50 mg (**1j**), 69 mg was isolated and yield is 69%. **<sup>1</sup>H NMR (400 MHz, CDCl<sub>3</sub>)**: δ 7.91 (s, 1H), 7.57 (d, *J* = 2.7 Hz, 1H), 7.33 (d, *J* = 7.8 Hz, 2H), 7.24 (d, *J* = 7.8 Hz, 1H), 7.06 (d, *J* = 7.9 Hz, 2H), 6.74 (d, *J* = 7.9 Hz, 1H), 4.17 (d, *J* = 3.2 Hz, 1H), 2.36 (s, 3H), 1.33 – 1.24 (m, 1H), 1.06 (dt, *J* = 10.2, 5.2 Hz, 1H), 0.99 – 0.90 (m, 1H), 0.85 (dd, *J* = 9.6, 4.8 Hz, 1H). **<sup>13</sup>C NMR (101 MHz, CDCl<sub>3</sub>)**: δ 166.4, 139.3, 138.3, 136.2, 133.8, 131.5, 129.0, 128.6, 121.8, 121.7, 61.6, 23.0, 21.0, 18.1, 10.6.

**HRMS (ESI-TOF)** *m/z*: [M + H]<sup>+</sup> Calcd for C<sub>18</sub>H<sub>16</sub>BrNOH 342.0494; Found 342.0501.

**3'-(4-Bromophenyl)-7'-fluoro-2',3'-dihydro-1'*H*-spiro[cyclopropane-1,4'-isoquinolin]-1'-one (3ka).**

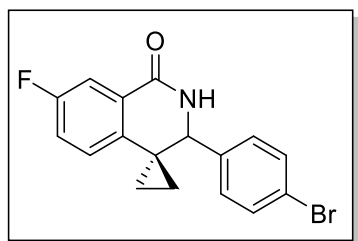

White Solid; eluent (12% ethyl acetate in hexane). The reaction scale is 50 mg (**1k**), 76 mg was isolated and yield is 76%. **<sup>1</sup>H NMR (400 MHz, CDCl<sub>3</sub>)** δ 7.78 (d, *J* = 8.7 Hz, 1H), 7.71 (s, 1H), 7.36 (d, *J* = 7.9 Hz, 2H), 7.13 (t, *J* = 8.2 Hz, 1H), 7.05 (d, *J* = 8.0 Hz, 2H), 6.88 – 6.79 (m, 1H), 4.20 (s, 1H), 1.29 (d, *J* = 8.1 Hz, 1H), 1.08 (d, *J* = 4.2 Hz, 1H), 1.04 – 0.95 (m, 1H), 0.87 (d, *J* =

4.8 Hz, 1H). **<sup>13</sup>C NMR (101 MHz, CDCl<sub>3</sub>)** δ 165.2, 161.4, 138.7, 137.0, 131.6, 131.1, 128.9, 123.8, 122.0, 120.1, 114.9, 61.5, 22.9, 18.0, 10.8.

**HRMS (ESI-TOF)** m/z: [M + H]<sup>+</sup> Calcd for C<sub>17</sub>H<sub>13</sub>BrFNOH 346.0243; Found 346.0242.

**3'-(4-Bromophenyl)-7'-chloro-2',3'-dihydro-1'H-spiro[cyclopropane-1,4'-isoquinolin]-1'-one (3la).**

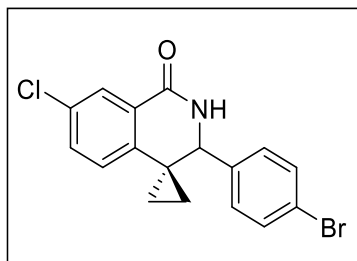

White Solid; eluent (12% ethyl acetate in hexane). The reaction scale is 50 mg (**1l**), 71 mg was isolated and yield is 74%. **<sup>1</sup>H NMR (400 MHz, CDCl<sub>3</sub>)** δ 8.06 (d, *J* = 1.9 Hz, 1H), 7.85 (d, *J* = 2.4 Hz, 1H), 7.39 (dd, *J* = 8.4, 2.2 Hz, 1H), 7.36 (d, *J* = 8.4 Hz, 2H), 7.05 (d, *J* = 8.2 Hz, 2H), 6.80 (d, *J* = 8.3 Hz, 1H), 4.19 (d, *J* = 3.6 Hz, 1H), 1.36 – 1.28 (m, 1H), 1.12 (dt, *J* = 10.5, 5.3 Hz, 1H), 1.02 (dd, *J* = 10.9, 4.8 Hz, 1H), 0.92 – 0.82 (m, 1H). **<sup>13</sup>C NMR (101 MHz, CDCl<sub>3</sub>)** δ 165.1, 139.8, 138.7, 133.0, 132.6, 131.7, 130.7, 128.9, 128.1, 123.4, 122.1, 61.4, 23.0, 18.5, 11.0.

**HRMS (ESI-TOF)** m/z: [M + H]<sup>+</sup> Calcd for C<sub>17</sub>H<sub>13</sub>BrClNOH 361.9947; Found 361.9950.

**3'-(4-Bromophenyl)-1'-oxo-2',3'-dihydro-1'H-spiro[cyclopropane-1,4'-isoquinoline]-7'-carbonitrile (3ma).**

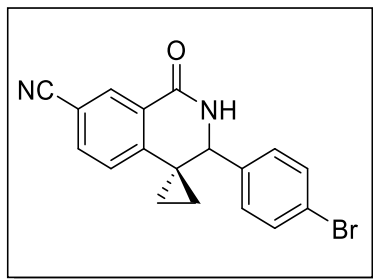

White Solid; eluent (15% ethyl acetate in hexane). The reaction scale is 50 mg (**1m**), 76 mg was isolated and yield is 78%. **<sup>1</sup>H NMR (400 MHz, CDCl<sub>3</sub>)** δ 8.40 (s, 1H), 7.71 (d, *J* = 8.0 Hz, 1H), 7.40 (d, *J* = 8.0 Hz, 3H), 7.05 (d, *J* = 8.0 Hz, 2H), 6.98 (d, *J* = 8.1 Hz, 1H), 4.30 (s, 1H), 1.43 – 1.32 (m, 1H), 1.26 – 1.17 (m, 1H), 1.17 – 1.08 (m, 1H), 1.05 – 0.95 (m, 1H). **<sup>13</sup>C NMR (101 MHz, CDCl<sub>3</sub>)** δ 164.0, 146.8, 138.1, 136.1, 132.0, 131.9, 130.2, 128.8, 122.9, 122.5, 118.0, 110.7, 61.1, 23.8, 19.0, 12.1.

**HRMS (ESI-TOF)** m/z: [M + H]<sup>+</sup> Calcd for C<sub>18</sub>H<sub>13</sub>BrN<sub>2</sub>OH 353.0290; Found 353.0285.

**3'-(4-Bromophenyl)-6',7'-dimethyl-2',3'-dihydro-1'*H*-spiro[cyclopropane-1,4'-isoquinolin]-1'-one (3na).**

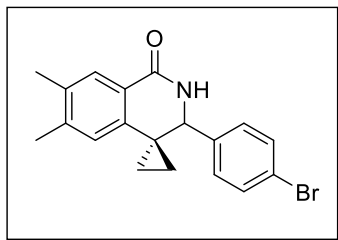

Pale yellow Solid; eluent (12% ethyl acetate in hexane). The reaction scale is 50 mg (**1n**), 72 mg was isolated and yield is 75%. **<sup>1</sup>H NMR (400 MHz, CDCl<sub>3</sub>)**  $\delta$  7.87 (s, 1H), 7.36 (d,  $J$  = 8.3 Hz, 2H), 7.06 (d,  $J$  = 8.2 Hz, 2H), 6.85 (s, 1H), 6.59 (s, 1H), 4.17 (d,  $J$  = 3.3 Hz, 1H), 2.28 (s, 3H), 2.25 (s, 3H), 1.27 (dd,  $J$  = 14.4, 6.2 Hz, 1H), 1.08 – 1.00 (m, 1H), 0.98 – 0.91 (m, 1H), 0.89 – 0.83 (m, 1H). **<sup>13</sup>C NMR (101 MHz, CDCl<sub>3</sub>)**  $\delta$  166.3, 142.4, 139.2, 138.6, 135.0, 131.6, 129.1, 129.0, 126.6, 122.9, 121.9, 61.8, 23.0, 20.2, 19.3, 17.8, 10.7.

**HRMS (ESI-TOF)**  $m/z$ :  $[M + H]^+$  Calcd for C<sub>19</sub>H<sub>18</sub>BrNOH 356.0650; Found 356.0642.

**3'-(4-Bromophenyl)-8'-chloro-2',3'-dihydro-1'*H*-spiro[cyclopropane-1,4'-isoquinolin]-1'-one (3oa).**

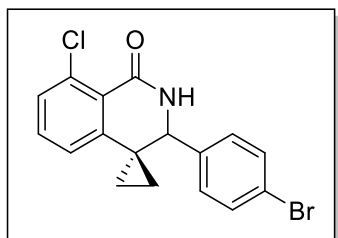

White Solid; eluent (12% ethyl acetate in hexane). The reaction scale is 50 mg (**1o**), 43 mg was isolated and yield is 45%. **<sup>1</sup>H NMR (400 MHz, CDCl<sub>3</sub>)**  $\delta$  7.45 – 7.34 (m, 3H), 7.33 (s, 1H), 7.29 (d,  $J$  = 7.6 Hz, 1H), 7.08 (d,  $J$  = 7.8 Hz, 2H), 6.79 (d,  $J$  = 7.4 Hz, 1H), 4.15 (d,  $J$  = 3.5 Hz, 1H), 1.35 (d,  $J$  = 9.7 Hz, 1H), 1.08 (s, 2H), 0.96 – 0.87 (m, 1H). **<sup>13</sup>C NMR (101 MHz, CDCl<sub>3</sub>)**  $\delta$  163.9, 143.9, 138.1, 135.1, 132.6, 131.6, 130.5, 128.8, 122.0, 121.0, 60.7, 25.2, 16.9, 10.9.

**HRMS (ESI-TOF)**  $m/z$ :  $[M + H]^+$  Calcd for C<sub>17</sub>H<sub>13</sub>BrClNOH 361.9947; Found 361.9946.

**3'-(4-Bromophenyl)-8'-fluoro-2',3'-dihydro-1'*H*-spiro[cyclopropane-1,4'-isoquinolin]-1'-one (3pa).**

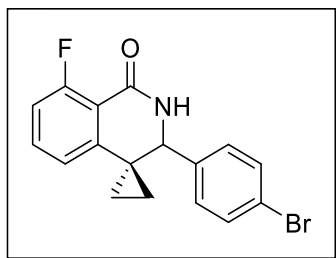

White Solid; eluent (12% ethyl acetate in hexane). The reaction scale is 50 mg (**1p**), 62 mg was isolated and yield is 62%. **<sup>1</sup>H NMR (400 MHz, CDCl<sub>3</sub>)** δ 7.75 (s, 1H), 7.36 (dd, J = 10.0, 6.9 Hz, 3H), 7.10 (d, J = 8.3 Hz, 2H), 6.99 (dd, J = 10.7, 8.6 Hz, 1H), 6.67 (d, J = 7.8 Hz, 1H), 4.16 (d, J = 4.3 Hz, 1H), 1.39 (dt, J = 10.9, 5.3 Hz, 1H), 1.17 – 1.02 (m, 2H), 0.95 – 0.86 (m, 1H). **<sup>13</sup>C NMR (101 MHz, CDCl<sub>3</sub>)** δ 163.6, 161.0, 144.1, 138.6, 134.1, 131.6, 128.9, 121.9, 117.8, 117.7, 115.5, 60.9, 24.1, 17.9, 11.0.

**HRMS (ESI-TOF)** m/z: [M + H]<sup>+</sup> Calcd for C<sub>17</sub>H<sub>13</sub>BrFNOH 346.0243; Found 346.0242.

**3'-(p-Tolyl)-2',3'-dihydro-1'H-spiro[cyclopropane-1,4'-isoquinolin]-1'-one (3ab).**

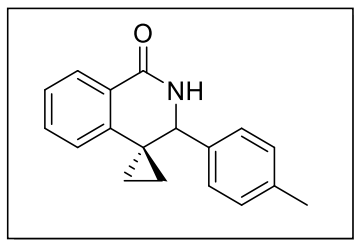

White Solid; eluent (12% ethyl acetate in hexane). The reaction scale is 50 mg (**1a**), 68 mg was isolated and yield is 80%. **<sup>1</sup>H NMR (500 MHz, CDCl<sub>3</sub>)**: δ 8.13 (d, J = 7.5 Hz, 1H), 7.43 (t, J = 7.6 Hz, 1H), 7.31 (t, J = 7.4 Hz, 1H), 7.07 (q, J = 8.1 Hz, 4H), 6.86 (d, J = 7.8 Hz, 1H), 4.37 (d, J = 9.2 Hz, 1H), 2.28 (s, 3H), 1.12 (t, J = 5.7 Hz, 1H), 1.02 – 0.93 (m, 3H). **<sup>13</sup>C NMR (126 MHz, CDCl<sub>3</sub>)**: δ 166.1, 142.0, 137.9, 136.3, 132.9, 129.3, 129.2, 128.2, 127.4, 126.3, 121.6, 61.6, 23.4, 21.1, 16.2, 11.6.

**HRMS (ESI-TOF)** m/z: [M+H]<sup>+</sup> Calcd for C<sub>18</sub>H<sub>17</sub>NOH 264.1388; Found 264.1371.

**3'-(4-Fluorophenyl)-2',3'-dihydro-1'H-spiro[cyclopropane-1,4'-isoquinolin]-1'-one (3ac).**

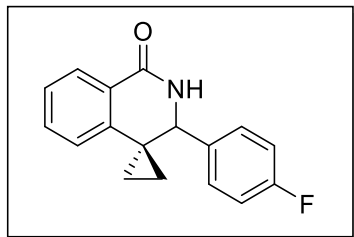

White Solid; eluent (12% ethyl acetate in hexane). The reaction scale is 50 mg (**1a**), 60 mg was isolated and yield is 70%. **<sup>1</sup>H NMR (400 MHz, CDCl<sub>3</sub>)**: δ 8.13 (d, J = 7.7 Hz, 1H), 7.45 (t, J = 7.5 Hz, 1H), 7.33 (t, J = 7.5 Hz, 1H), 7.17 (dd, J = 8.2, 5.5 Hz, 2H), 7.03 (s, 1H), 6.93 (t, J = 8.5 Hz, 2H), 6.87 (d, J = 7.8 Hz, 1H), 4.31 (d, J = 3.2 Hz, 1H), 1.25 (dd, J = 9.5, 4.5 Hz, 1H), 1.07 – 1.01 (m, 1H), 0.98 (d, J = 5.1 Hz, 1H), 0.94 (dd, J = 9.3, 6.1 Hz, 1H). **<sup>13</sup>C NMR (101 MHz, CDCl<sub>3</sub>)**: δ 166.1, 162.4, 141.5, 135.6, 133.1, 129.2, 129.0, 128.2, 126.4, 121.7, 115.4, 61.4, 23.4, 17.3, 11.2.

**HRMS (ESI-TOF)** m/z: [M+H]<sup>+</sup> Calcd for C<sub>17</sub>H<sub>14</sub>FNOH 268.1138; Found 268.1144.

**3'-(4-Chlorophenyl)-2',3'-dihydro-1'H-spiro[cyclopropane-1,4'-isoquinolin]-1'-one (3ad).**

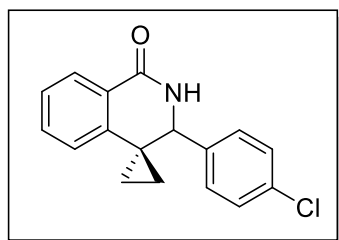

White Solid; eluent (12% ethyl acetate in hexane). The reaction scale is 50 mg (**1a**), 80 mg was isolated and yield is 87%. **<sup>1</sup>H NMR (500 MHz, CDCl<sub>3</sub>)**: δ 8.13 (d, J = 7.7 Hz, 1H), 7.45 (t, J = 7.6 Hz, 1H), 7.33 (t, J = 7.6 Hz, 1H), 7.22 (d, J = 8.3 Hz, 2H), 7.13 (d, J = 8.3 Hz, 2H), 6.86 (d, J = 7.9 Hz, 2H), 4.27 (d, J = 3.3 Hz, 1H), 1.27 (dd, J = 10.0, 5.3 Hz, 1H), 1.08 – 1.03 (m, 1H), 0.99 (dd, J = 10.6, 5.0 Hz, 1H), 0.94 (dd, J = 9.7, 3.9 Hz, 1H). **<sup>13</sup>C NMR (126 MHz, CDCl<sub>3</sub>)**: δ 166.0, 141.3, 138.3, 133.9, 133.1, 129.1, 128.7, 128.6, 128.2, 126.5, 121.7, 61.5, 23.4, 17.6, 11.1.

**HRMS (ESI-TOF)** m/z: [M+H]<sup>+</sup> Calcd for C<sub>17</sub>H<sub>14</sub>ClNOH 284.0842; Found 284.0845.

**3'-(*m*-Tolyl)-2',3'-dihydro-1'H-spiro[cyclopropane-1,4'-isoquinolin]-1'-one (3ae).**

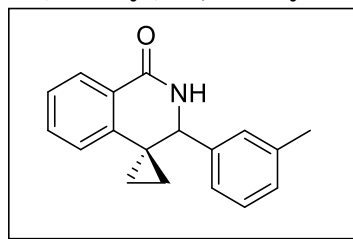

White Solid; eluent (12% ethyl acetate in hexane). The reaction scale is 50 mg (**1a**), 61 mg was isolated and yield is 72%. **<sup>1</sup>H NMR (400 MHz, CDCl<sub>3</sub>)** δ 8.15 (d, J = 7.7 Hz, 1H), 7.43 (d, J = 7.6 Hz, 1H), 7.33 (d, J = 7.5 Hz, 1H), 7.15 (t, J = 7.5 Hz, 1H), 7.07 (d, J = 7.5 Hz, 1H), 7.00 (d, J = 9.5 Hz, 2H), 6.87 (d, J = 7.7 Hz, 1H), 6.59 (s, 1H), 4.40 (s, 1H), 2.29 (s, 3H), 1.14 – 1.08 (m, 1H), 0.97 (dd, J = 11.7, 6.5 Hz, 3H). **<sup>13</sup>C NMR (101 MHz, CDCl<sub>3</sub>)** δ 166.1, 142.0, 139.2, 138.2, 132.9, 128.9, 128.4, 128.3, 128.2, 127.5, 126.3, 124.6, 121.6, 61.8, 23.3, 21.5, 16.0, 11.8.

**HRMS (ESI-TOF)** m/z: [M+H]<sup>+</sup> Calcd for C<sub>18</sub>H<sub>17</sub>NOH 264.1388; Found 264.1377.

**3'-(3-Chlorophenyl)-2',3'-dihydro-1'H-spiro[cyclopropane-1,4'-isoquinolin]-1'-one (3af).**

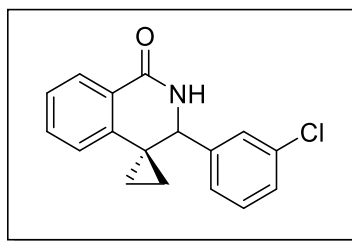

White Solid; eluent (12% ethyl acetate in hexane). The reaction scale is 50 mg (**1a**), 79 mg was isolated and yield is 86%. **<sup>1</sup>H NMR (400 MHz, CDCl<sub>3</sub>):** δ 8.13 (d, *J* = 7.7 Hz, 1H), 7.45 (t, *J* = 7.6 Hz, 1H), 7.33 (t, *J* = 7.6 Hz, 1H), 7.24 – 7.15 (m, 3H), 7.08 (d, *J* = 7.5 Hz, 1H), 7.01 (s, 1H), 6.87 (d, *J* = 7.8 Hz, 1H), 4.24 (d, *J* = 3.3 Hz, 1H), 1.32 (dt, *J* = 10.8, 5.5 Hz, 1H), 1.14 – 1.06 (m, 1H), 1.06 – 0.98 (m, 1H), 0.98 – 0.90 (m, 1H). **<sup>13</sup>C NMR (101 MHz, CDCl<sub>3</sub>):** δ 166.0, 142.0, 141.3, 134.4, 133.1, 129.8, 129.1, 128.2, 127.5, 126.5, 125.4, 121.6, 61.7, 23.3, 17.9, 11.0.

**HRMS (ESI-TOF)** *m/z*: [M+H]<sup>+</sup> Calcd for C<sub>17</sub>H<sub>14</sub>ClNOH 284.0842; Found 284.0841.

**3'-(3-Bromophenyl)-2',3'-dihydro-1'H-spiro[cyclopropane-1,4'-isoquinolin]-1'-one (3ag).**

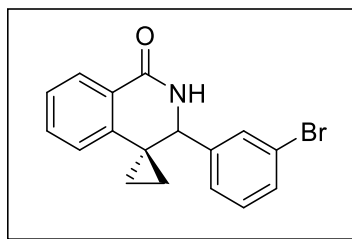

White Solid; eluent (12% ethyl acetate in hexane). The reaction scale is 50 mg (**1a**), 75 mg was isolated and yield is 72%. **<sup>1</sup>H NMR (400 MHz, CDCl<sub>3</sub>):** δ 8.12 (dd, *J* = 7.7, 0.9 Hz, 1H), 7.45 (td, *J* = 7.7, 1.3 Hz, 1H), 7.38 – 7.30 (m, 4H), 7.10 (dt, *J* = 11.8, 7.8 Hz, 2H), 6.87 (d, *J* = 7.7 Hz, 1H), 4.22 (d, *J* = 3.7 Hz, 1H), 1.36 – 1.28 (m, 1H), 1.12 – 1.06 (m, 1H), 1.00 (dd, *J* = 9.7, 5.8 Hz, 1H), 0.91 (ddd, *J* = 10.2, 6.2, 4.4 Hz, 1H). **<sup>13</sup>C NMR (101 MHz, CDCl<sub>3</sub>):** δ 166.1, 142.3, 141.2, 133.1, 131.1, 130.5, 130.1, 129.2, 128.2, 126.5, 125.9, 122.5, 121.6, 61.6, 23.3, 18.1, 10.9.

**HRMS (ESI-TOF)** *m/z*: [M+H]<sup>+</sup> Calcd for C<sub>17</sub>H<sub>14</sub>BrNOH 328.0337; Found 328.0323.

**3'-(2-Bromophenyl)-2',3'-dihydro-1'H-spiro[cyclopropane-1,4'-isoquinolin]-1'-one (3ah).**

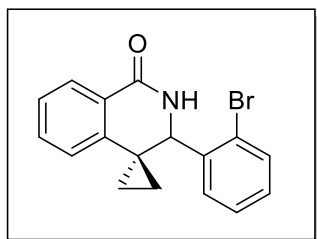

White Solid; eluent (12% ethyl acetate in hexane). The reaction scale is 50 mg (**1a**), 80 mg was isolated and yield is 76%. **<sup>1</sup>H NMR (400 MHz, CDCl<sub>3</sub>):** δ 8.12 (d, *J* = 7.7 Hz, 1H), 7.52 (dd, *J* =

13.2, 7.1 Hz, 2H), 7.34 (t,  $J = 7.5$  Hz, 1H), 7.23 (d,  $J = 7.4$  Hz, 1H), 7.11 (p,  $J = 7.5$  Hz, 2H), 6.97 (d,  $J = 7.8$  Hz, 1H), 6.59 (s, 1H), 4.61 (d,  $J = 3.7$  Hz, 1H), 1.49 – 1.39 (m, 1H), 1.27 – 1.17 (m, 1H), 0.99 (t,  $J = 7.2$  Hz, 2H).  **$^{13}\text{C}$  NMR (101 MHz,  $\text{CDCl}_3$ ):**  $\delta$  165.2, 142.0, 139.4, 133.2, 133.1, 129.5, 129.0, 128.9, 128.5, 127.8, 126.4, 124.0, 121.1, 60.7, 21.8, 20.5, 11.0.

**HRMS (ESI-TOF)**  $m/z$ :  $[\text{M}+\text{H}]^+$  Calcd for  $\text{C}_{17}\text{H}_{14}\text{BrNOH}$  328.0337; Found 328.0336.

**3'-Phenyl-2',3'-dihydro-1'*H*-spiro[cyclopropane-1,4'-isoquinolin]-1'-one (3ai).**

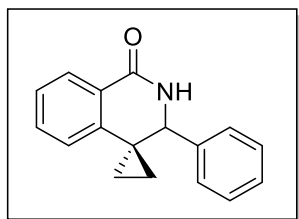

White Solid; eluent (12% ethyl acetate in hexane). The reaction scale is 50 mg (**1a**), 60 mg was isolated and yield is 75%.  **$^1\text{H}$  NMR (400 MHz,  $\text{CDCl}_3$ ):**  $\delta$  8.14 (d,  $J = 7.7$  Hz, 1H), 7.44 (t,  $J = 7.6$  Hz, 1H), 7.32 (t,  $J = 7.5$  Hz, 1H), 7.25 (d,  $J = 5.3$  Hz, 3H), 7.22 – 7.18 (m, 2H), 6.89 (s, 1H), 6.87 (d,  $J = 7.8$  Hz, 1H), 4.37 (d,  $J = 2.8$  Hz, 1H), 1.17 (dd,  $J = 8.1, 4.0$  Hz, 1H), 1.00 (d,  $J = 4.4$  Hz, 2H), 0.96 (dd,  $J = 10.2, 5.6$  Hz, 1H).  **$^{13}\text{C}$  NMR (101 MHz,  $\text{CDCl}_3$ ):**  $\delta$  166.1, 141.8, 139.5, 132.9, 129.3, 128.5, 128.2, 128.1, 127.4, 126.3, 121.6, 62.0, 23.4, 16.8, 11.4.

**HRMS (ESI-TOF)**  $m/z$ :  $[\text{M}+\text{H}]^+$  Calcd for  $\text{C}_{17}\text{H}_{15}\text{NOH}$  250.1232; Found 250.1230.

**4-(4-Bromophenyl)-7-methyl-5-azaspiro[2.5]oct-7-en-6-one (5aa).**

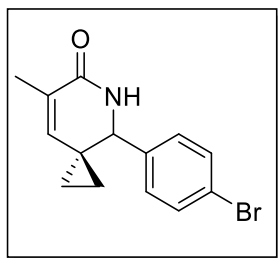

Yellow Solid; eluent (10% ethyl acetate in hexane). The reaction scale is 50 mg (**5a**), 54 mg was isolated and yield is 45%.  **$^1\text{H}$  NMR (400 MHz,  $\text{CDCl}_3$ )**  $\delta$  7.47 (d,  $J = 8.2$  Hz, 2H), 7.15 (d,  $J = 8.1$  Hz, 2H), 5.84 (s, 1H), 5.75 (s, 1H), 4.51 (s, 1H), 1.91 (s, 3H), 0.80 – 0.74 (m, 1H), 0.65 (dt,  $J = 14.0, 8.8$  Hz, 3H).  **$^{13}\text{C}$  NMR (101 MHz,  $\text{CDCl}_3$ )**  $\delta$  167.8, 143.3, 137.9, 131.7, 129.4, 129.1, 122.3, 60.4, 22.1, 16.4, 13.5, 11.7.

**HRMS (ESI-TOF)**  $m/z$ :  $[\text{M}+\text{H}]^+$  Calcd for  $\text{C}_{14}\text{H}_{14}\text{BrNOH}$  292.0337; Found 292.0325.

**7-Methyl-4-(*p*-tolyl)-5-azaspiro[2.5]oct-7-en-6-one (5ab).**

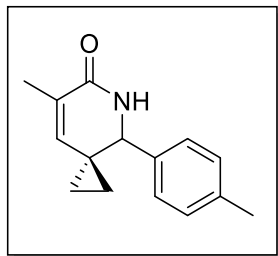

Yellow Solid; eluent (10% ethyl acetate in hexane). The reaction scale is 50 mg (**5a**), 35 mg was isolated and yield is 36%. **<sup>1</sup>H NMR (400 MHz, CDCl<sub>3</sub>)** δ 7.14 (s, 4H), 5.77 (s, 1H), 5.68 (s, 1H), 4.63 (s, 1H), 2.34 (s, 3H), 1.92 (s, 3H), 0.71 (d, J = 11.5 Hz, 1H), 0.64 (d, J = 12.3 Hz, 2H), 0.56 (d, J = 9.6 Hz, 1H). **<sup>13</sup>C NMR (101 MHz, CDCl<sub>3</sub>)** δ 168.2, 143.9, 138.2, 135.2, 129.2, 128.9, 60.4, 22.33, 21.1, 16.4, 12.8, 11.5.

**HRMS (ESI-TOF)** m/z: [M+H]<sup>+</sup> Calcd for C<sub>15</sub>H<sub>17</sub>NOH 228.1388; Found 228.1380.

**7-Methyl-4-(*m*-tolyl)-5-azaspiro[2.5]oct-7-en-6-one (**5ae**).**

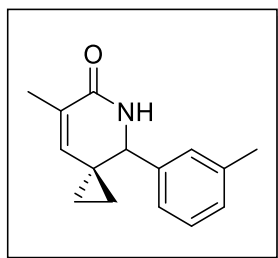

Yellow Solid; eluent (10% ethyl acetate in hexane). The reaction scale is 50 mg (**5a**), 32 mg was isolated and yield is 33%. **<sup>1</sup>H NMR (400 MHz, CDCl<sub>3</sub>)** δ 7.21 (d, J = 7.5 Hz, 1H), 7.12 (d, J = 7.6 Hz, 1H), 7.05 (d, J = 8.8 Hz, 2H), 5.78 (s, 1H), 5.70 (s, 1H), 4.62 (s, 1H), 2.34 (s, 3H), 1.93 (s, 3H), 0.73 (d, J = 11.5 Hz, 1H), 0.70 – 0.63 (m, 2H), 0.57 (d, J = 9.2 Hz, 1H). **<sup>13</sup>C NMR (101 MHz, CDCl<sub>3</sub>)** δ 168.1, 143.9, 138.2, 129.1, 128.8, 128.6, 128.4, 125.0, 60.7, 22.2, 21.4, 16.4, 12.9, 11.6.

**HRMS (ESI-TOF)** m/z: [M+H]<sup>+</sup> Calcd for C<sub>15</sub>H<sub>17</sub>NOH 228.1388; Found 228.1385.

**7-Methyl-4-phenyl-5-azaspiro[2.5]oct-7-en-6-one (**5ai**).**

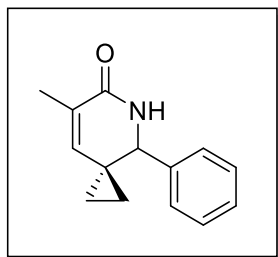

Yellow Solid; eluent (10% ethyl acetate in hexane). The reaction scale is 50 mg (**5a**), 32 mg was isolated and yield is 37%. **<sup>1</sup>H NMR (400 MHz, CDCl<sub>3</sub>)** δ 7.34 (q, J = 6.2 Hz, 3H), 7.29 – 7.26 (m,



2H), 5.78 (s, 1H), 5.70 (s, 1H), 4.64 (s, 1H), 1.93 (s, 3H), 0.77 – 0.72 (m, 1H), 0.70 – 0.65 (m, 2H), 0.61 – 0.55 (m, 1H). <sup>13</sup>C NMR (101 MHz, CDCl<sub>3</sub>) δ 168.1, 143.7, 138.4, 128.9, 128.5, 128.4, 127.9, 60.8, 22.3, 16.4, 13.0, 11.5.

HRMS (ESI-TOF) m/z: [M+H]<sup>+</sup> Calcd for C<sub>14</sub>H<sub>15</sub>NOH 214.1232; Found 214.1228.

**3'-Phenyl-2',3'-dihydro-1'H-spiro[cyclopropane-1,4'-isoquinoline] (6).**

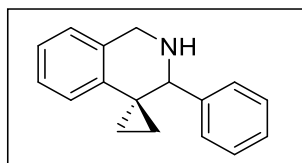

Pale Yellow Liquid; eluent (50% ethyl acetate in hexane). The reaction scale is 50 mg (**3aa**), 37 mg was isolated and yield is 79%. <sup>1</sup>H NMR (400 MHz, CDCl<sub>3</sub>) δ 7.32 (d, J = 6.8 Hz, 2H), 7.30 – 7.24 (m, 3H), 7.16 (d, J = 7.6 Hz, 1H), 7.09 (t, J = 7.2 Hz, 1H), 6.98 (d, J = 7.4 Hz, 1H), 6.83 (d, J = 7.8 Hz, 1H), 4.09 (d, J = 16.1 Hz, 1H), 3.94 (d, J = 16.8 Hz, 1H), 1.14 (d, J = 7.2 Hz, 1H), 0.90 (dd, J = 16.0, 6.4 Hz, 2H), 0.85 – 0.77 (m, 1H). <sup>13</sup>C NMR (101 MHz, CDCl<sub>3</sub>) δ 140.5, 139.9, 135.7, 128.6, 128.0, 127.1, 126.8, 125.7, 124.8, 121.8, 64.0, 46.5, 21.7, 17.9, 14.2.

HRMS (ESI-TOF) m/z: [M+H]<sup>+</sup> Calcd for C<sub>17</sub>H<sub>17</sub>NH 236.1439; Found 236.1441.

**3'-(4-Bromophenyl)-1'-chloro-3'H-spiro[cyclopropane-1,4'-isoquinoline] (7aa).**

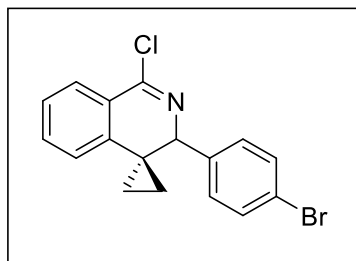

Pale Yellow Liquid; eluent (5% triethylamine in diethyl ether). The reaction scale is 50 mg (**3aa**), 39 mg was isolated and yield is 75%. <sup>1</sup>H NMR (400 MHz, CDCl<sub>3</sub>) δ 7.84 (d, J = 7.7 Hz, 1H), 7.45 (t, J = 7.5 Hz, 1H), 7.37 (d, J = 8.2 Hz, 2H), 7.32 (t, J = 7.6 Hz, 1H), 7.11 (d, J = 8.1 Hz, 2H), 6.94 (d, J = 7.7 Hz, 1H), 4.63 (s, 1H), 1.18 (d, J = 6.8 Hz, 1H), 1.04 (t, J = 7.1 Hz, 1H), 0.92 (d, J = 7.7 Hz, 2H). <sup>13</sup>C NMR (101 MHz, CDCl<sub>3</sub>) δ 155.6, 141.9, 137.8, 133.1, 131.3, 129.7, 128.9, 127.7, 126.5, 121.7, 121.5, 68.9, 20.2, 17.1, 9.7.

HRMS (ESI-TOF) m/z: [M+H]<sup>+</sup> Calcd for C<sub>17</sub>H<sub>13</sub>BrClNH 345.9998; Found 345.9997.

**1'-Chloro-3'-(3-chlorophenyl)-3'H-spiro[cyclopropane-1,4'-isoquinoline] (7af).**

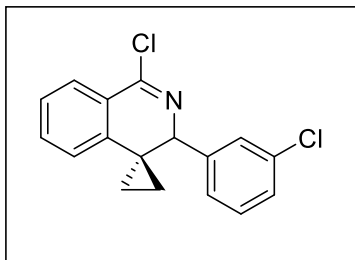

Pale Yellow Liquid; eluent (5% triethylamine in diethyl ether). The reaction scale is 50 mg (**3af**), 37 mg was isolated and yield is 70%. **<sup>1</sup>H NMR (400 MHz, CDCl<sub>3</sub>)** δ 7.85 (d, J = 7.7 Hz, 1H), 7.46 (t, J = 7.4 Hz, 1H), 7.32 (t, J = 7.5 Hz, 1H), 7.25 (s, 1H), 7.23 – 7.14 (m, 2H), 7.12 (d, J = 7.0 Hz, 1H), 6.96 (d, J = 7.7 Hz, 1H), 4.66 (s, 1H), 1.21 – 1.13 (m, 1H), 1.03 (t, J = 7.1 Hz, 1H), 0.95 – 0.86 (m, 2H). **<sup>13</sup>C NMR (101 MHz, CDCl<sub>3</sub>)** δ 155.7, 141.9, 140.8, 134.0, 133.2, 129.4, 128.9, 128.3, 127.8, 126.5, 126.2, 121.6, 68.9, 20.1, 16.8, 9.9.

**HRMS (ESI-TOF)** m/z: [M+H]<sup>+</sup> Calcd for C<sub>17</sub>H<sub>13</sub>Cl<sub>2</sub>NH 302.0503; Found 302.0504.

## Characteristic spectra of all compounds

### $^1\text{H}$ and $^{13}\text{C}$ NMR Spectra of Compound **3aa**.

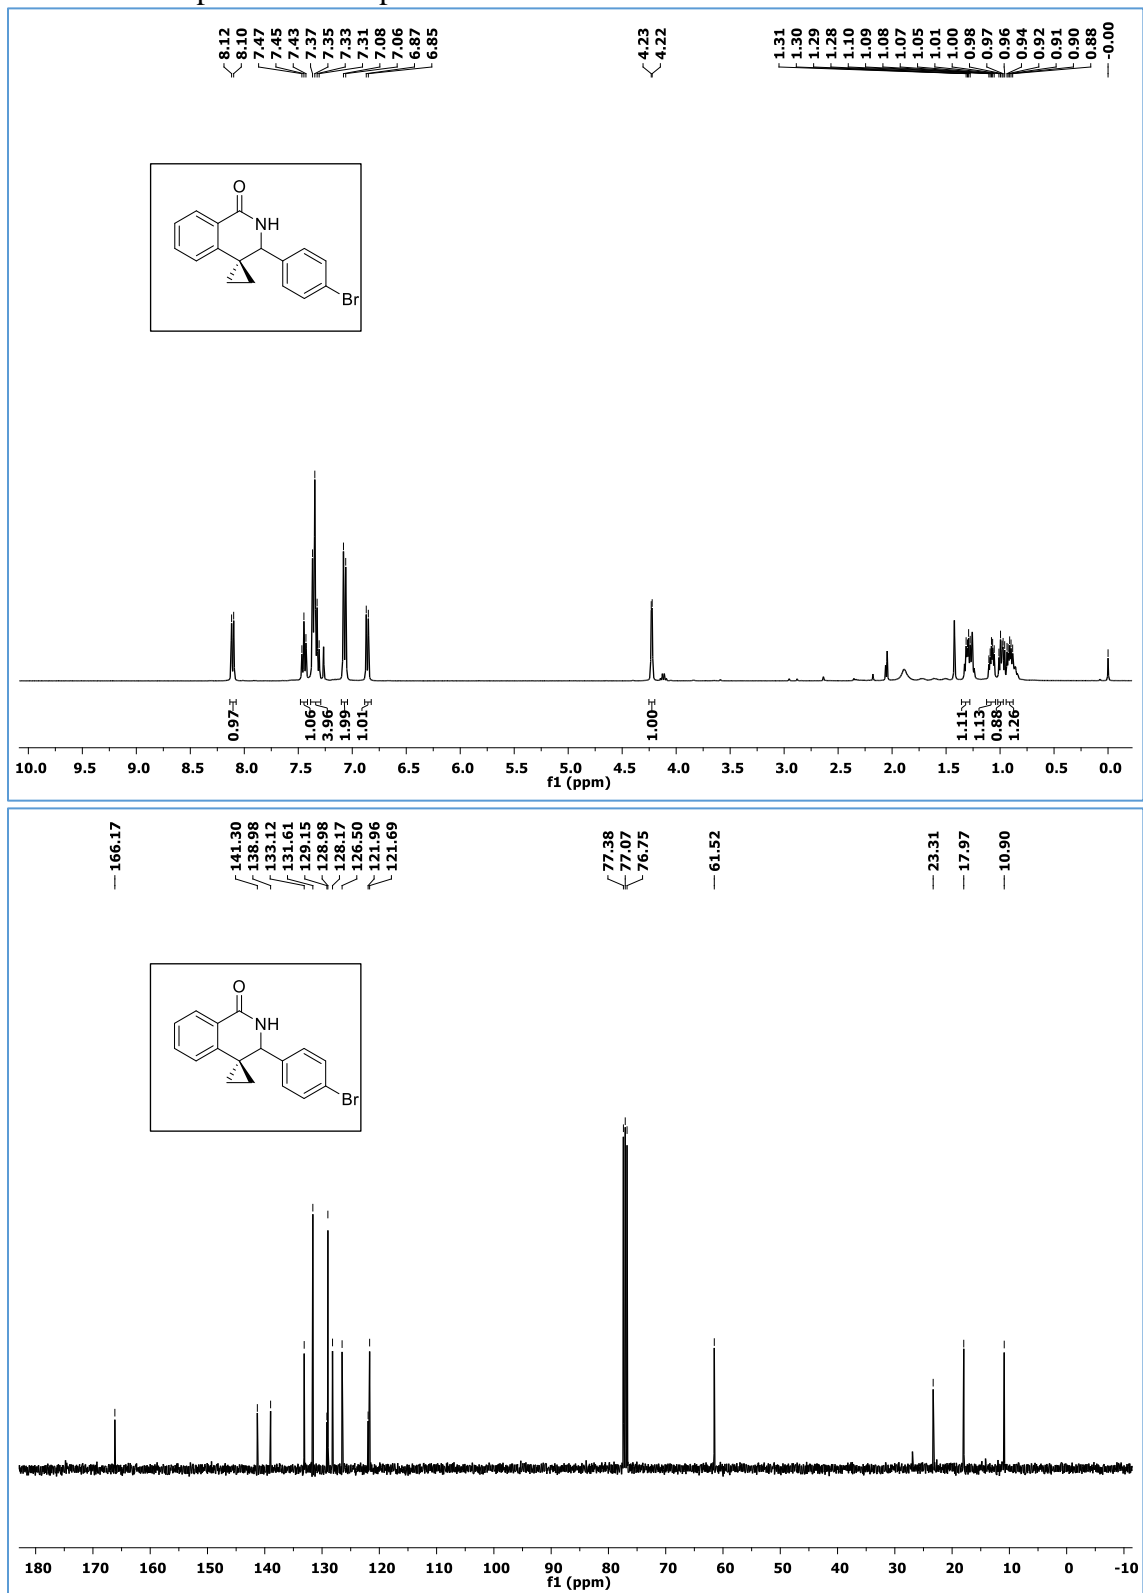

DEPT (135) NMR Spectrum of Compound **3aa**.

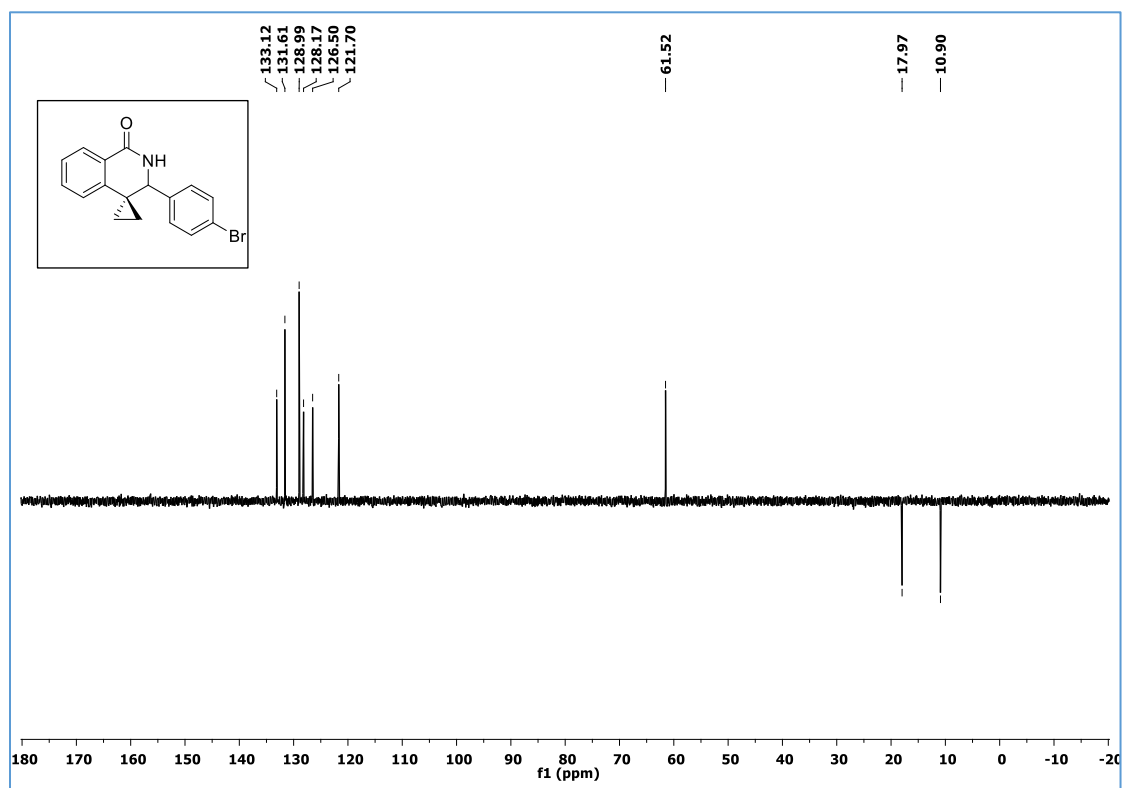

$^1\text{H}$  and  $^{13}\text{C}$  NMR Spectra of Compound **3ba**.

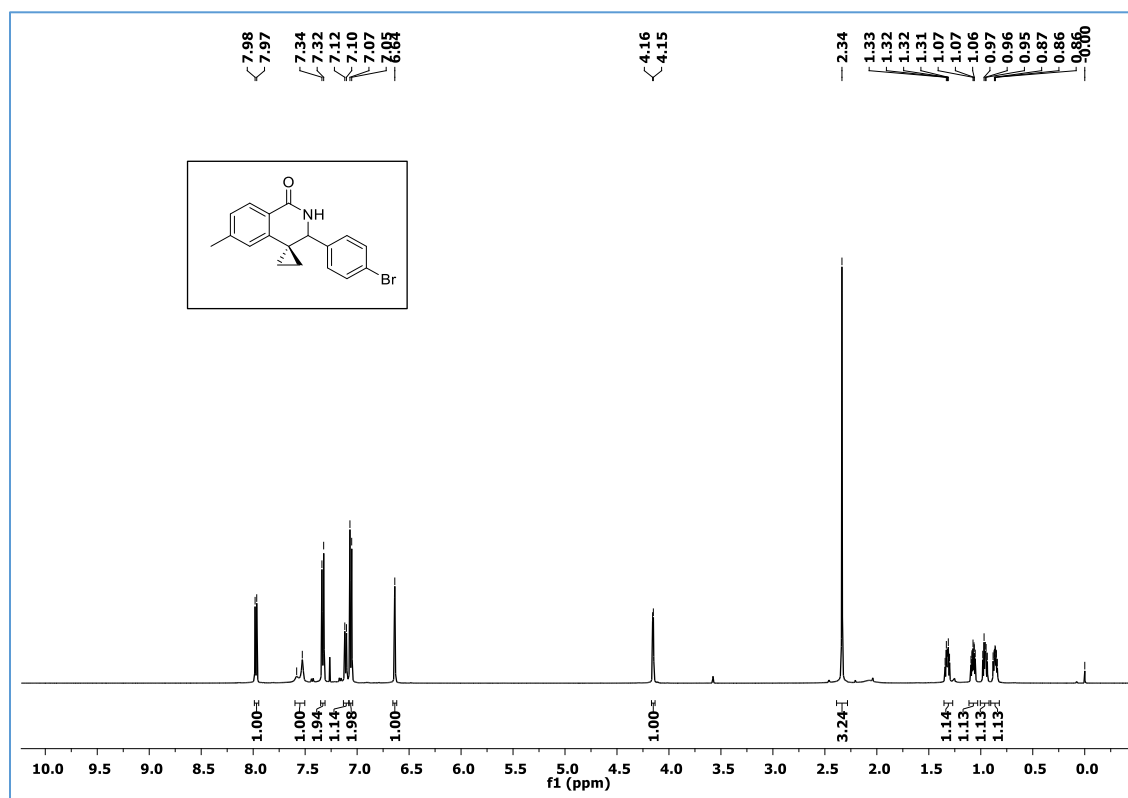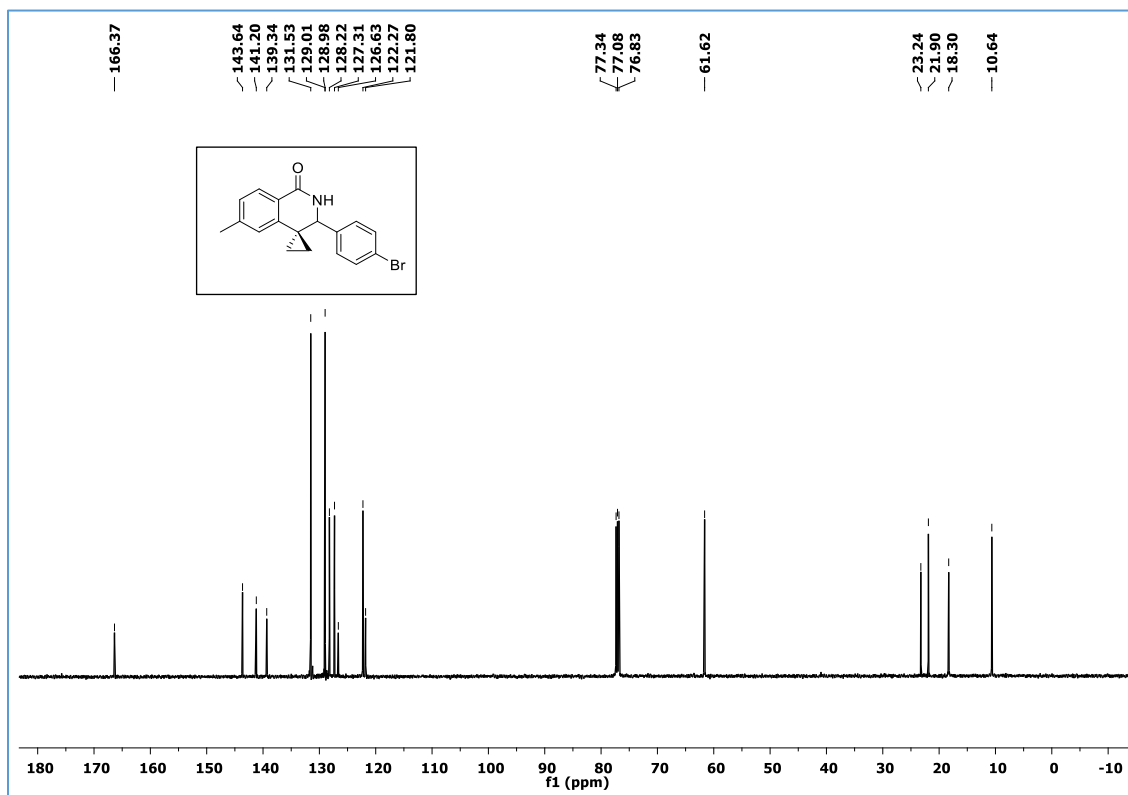

DEPT (135) NMR Spectrum of Compound **3ba**.

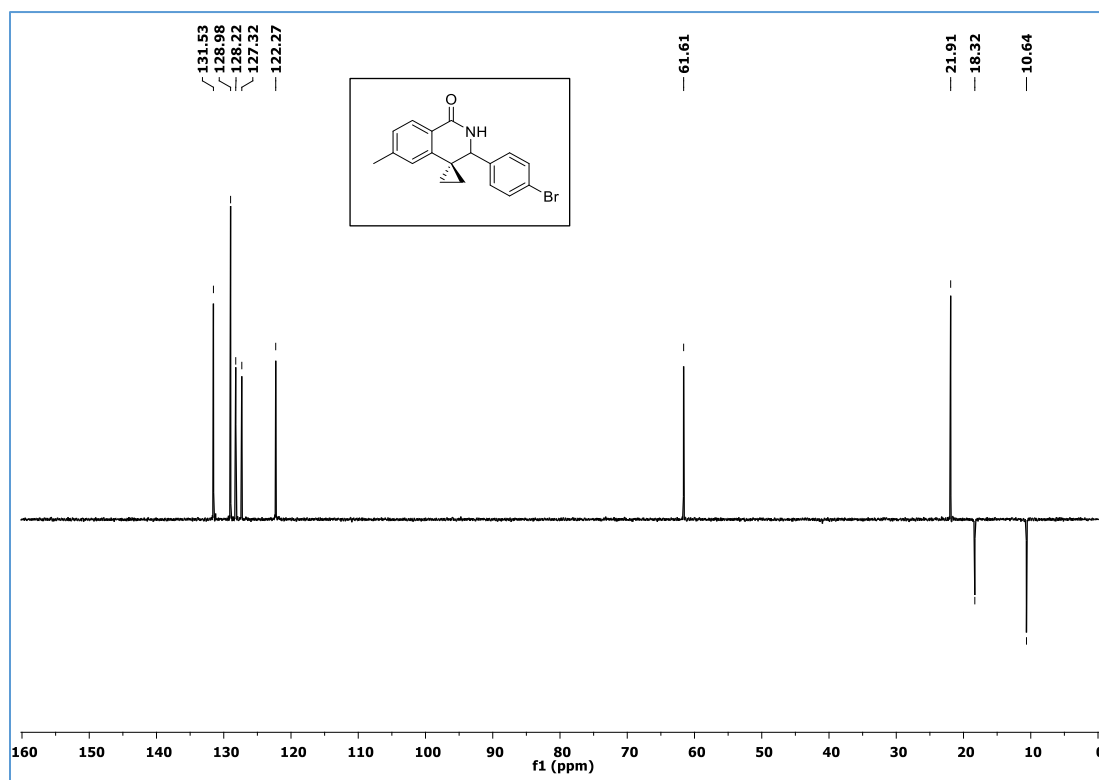

$^1\text{H}$  and  $^{13}\text{C}$  NMR Spectra of Compound **3cd**.

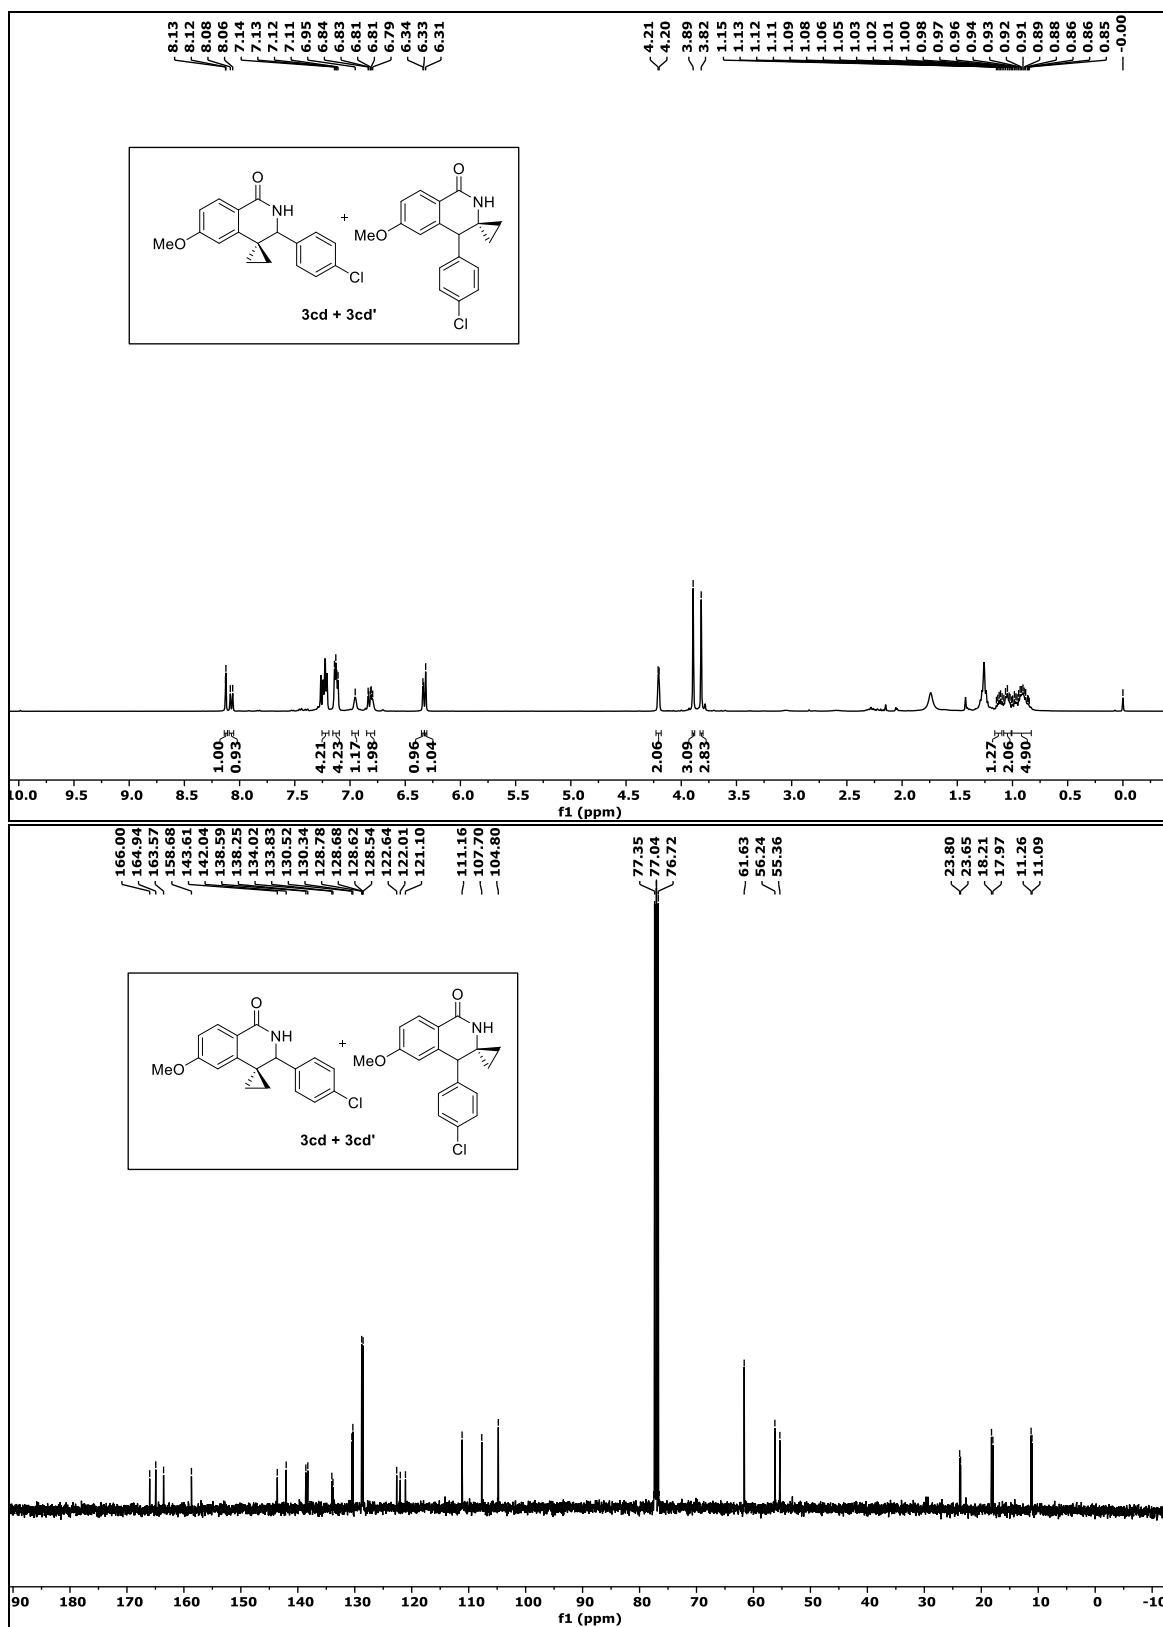

DEPT (135) NMR Spectrum of Compound **3cd**.

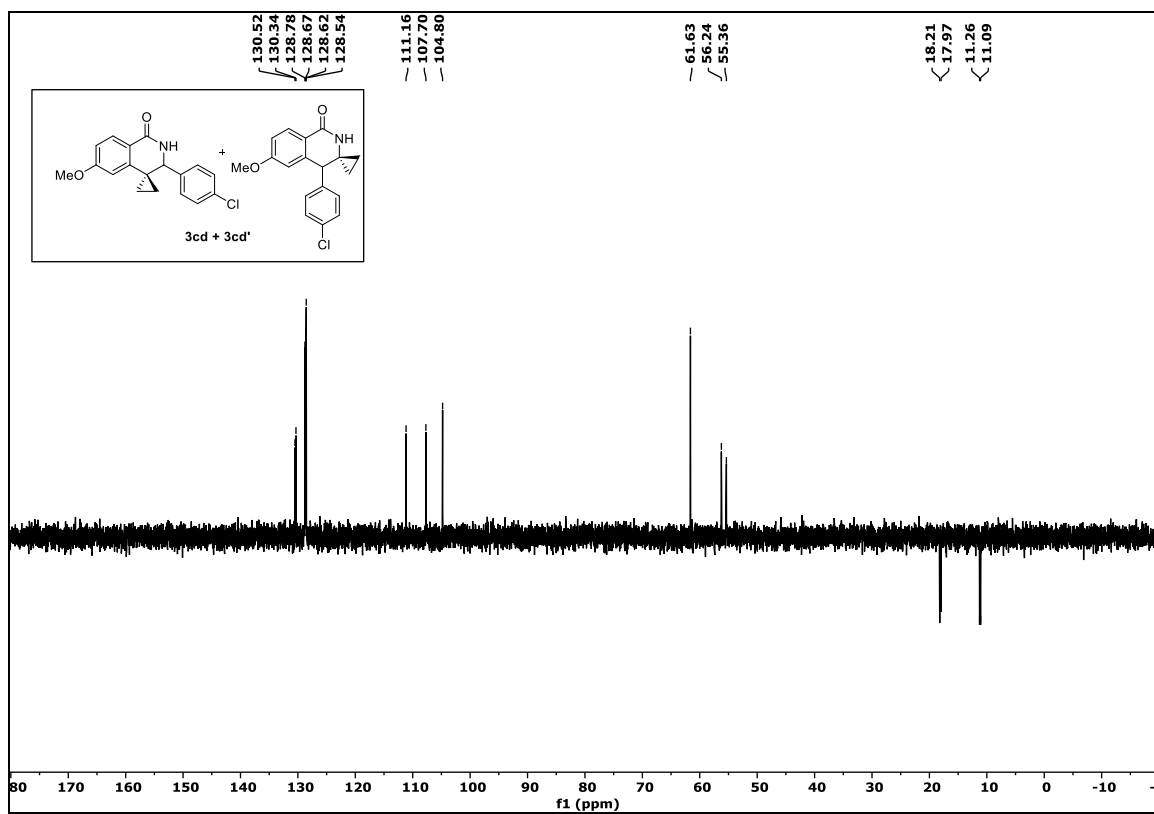



$^1\text{H}$  and  $^{13}\text{C}$  NMR Spectra of Compound **3da**.

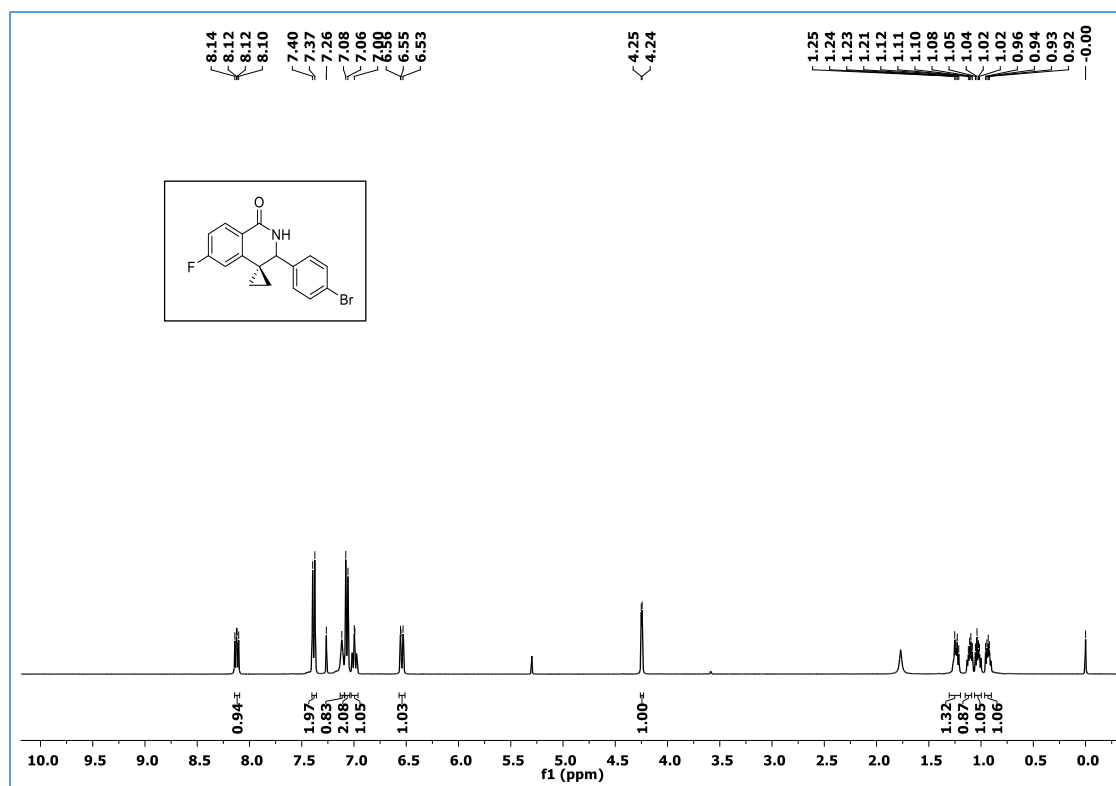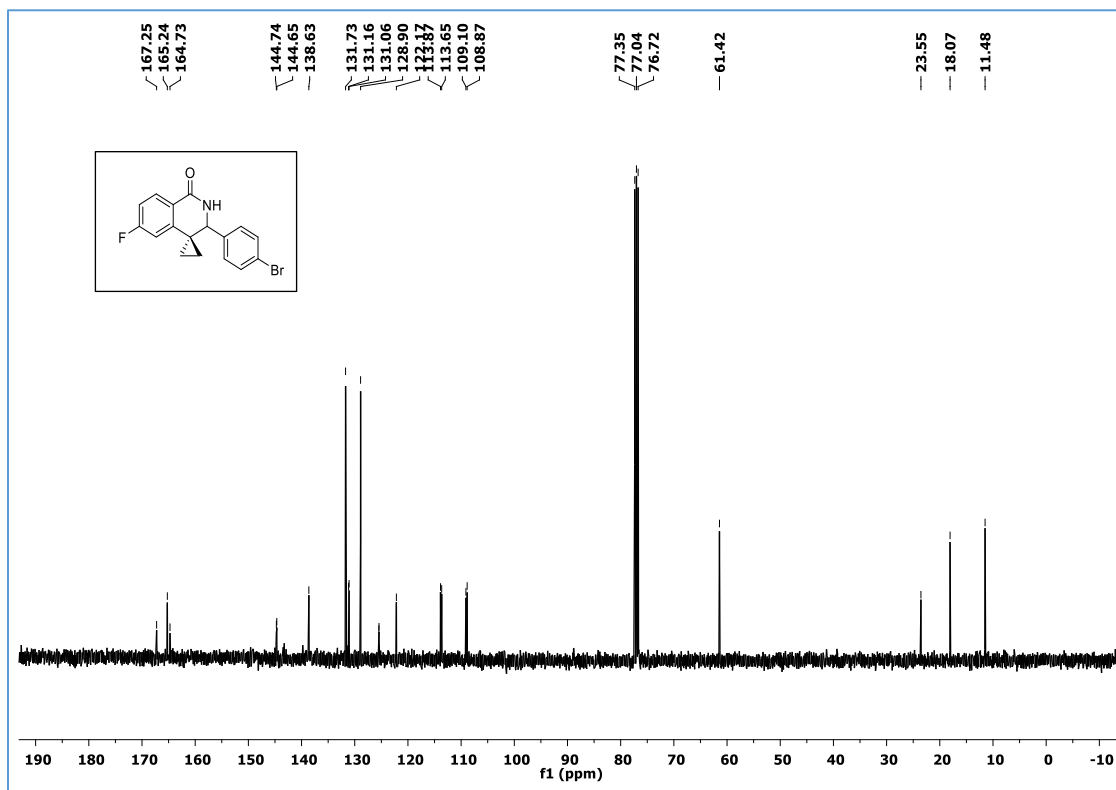

DEPT (135) NMR Spectrum of Compound **3da**.

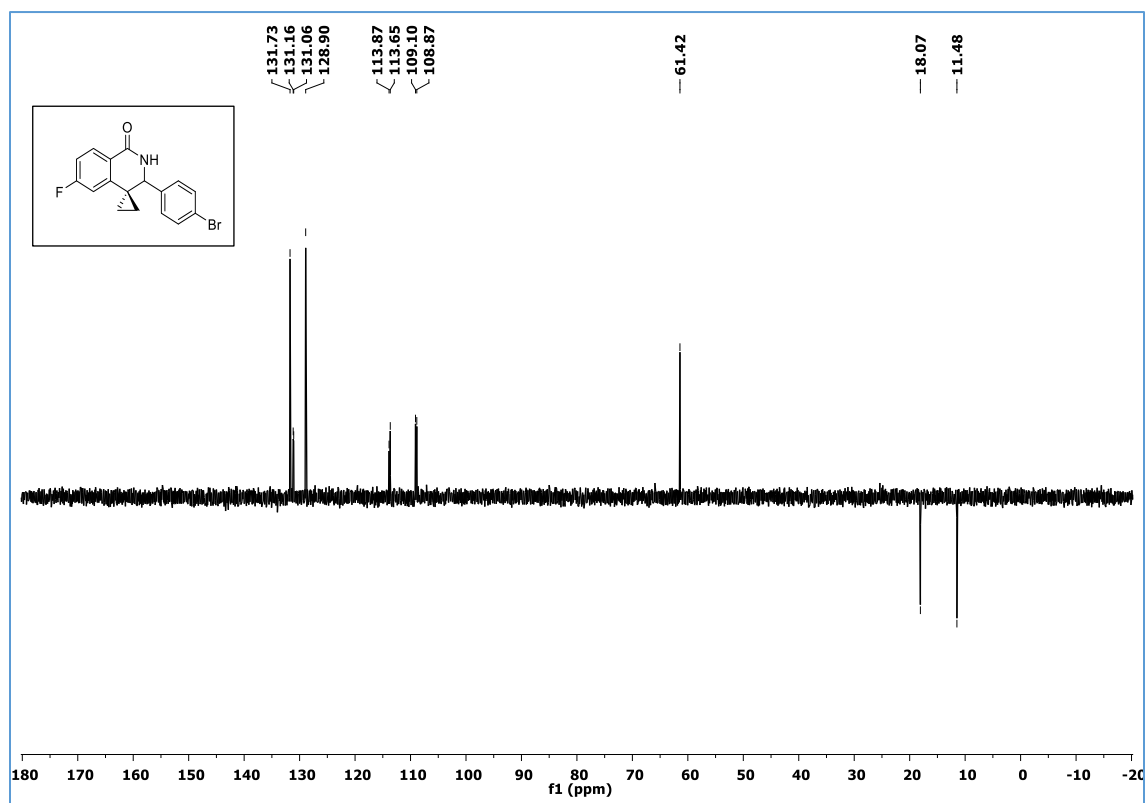

$^1\text{H}$  and  $^{13}\text{C}$  NMR Spectra of Compound **3ea**.

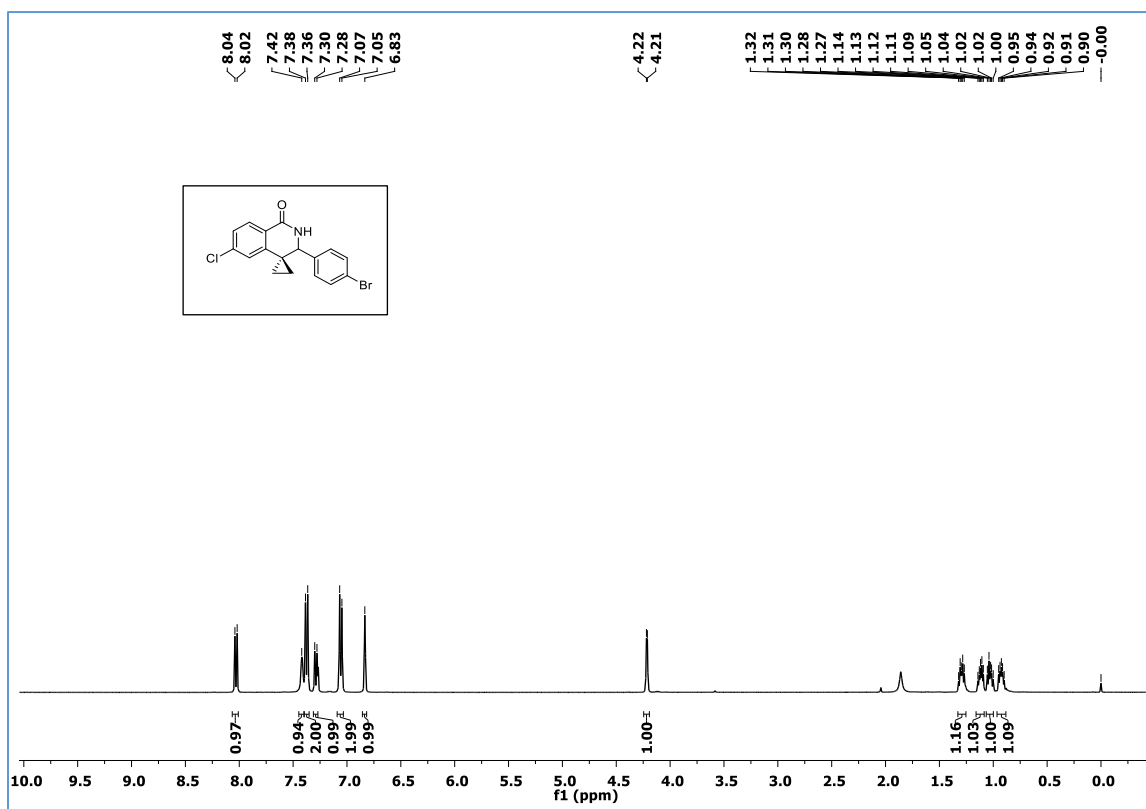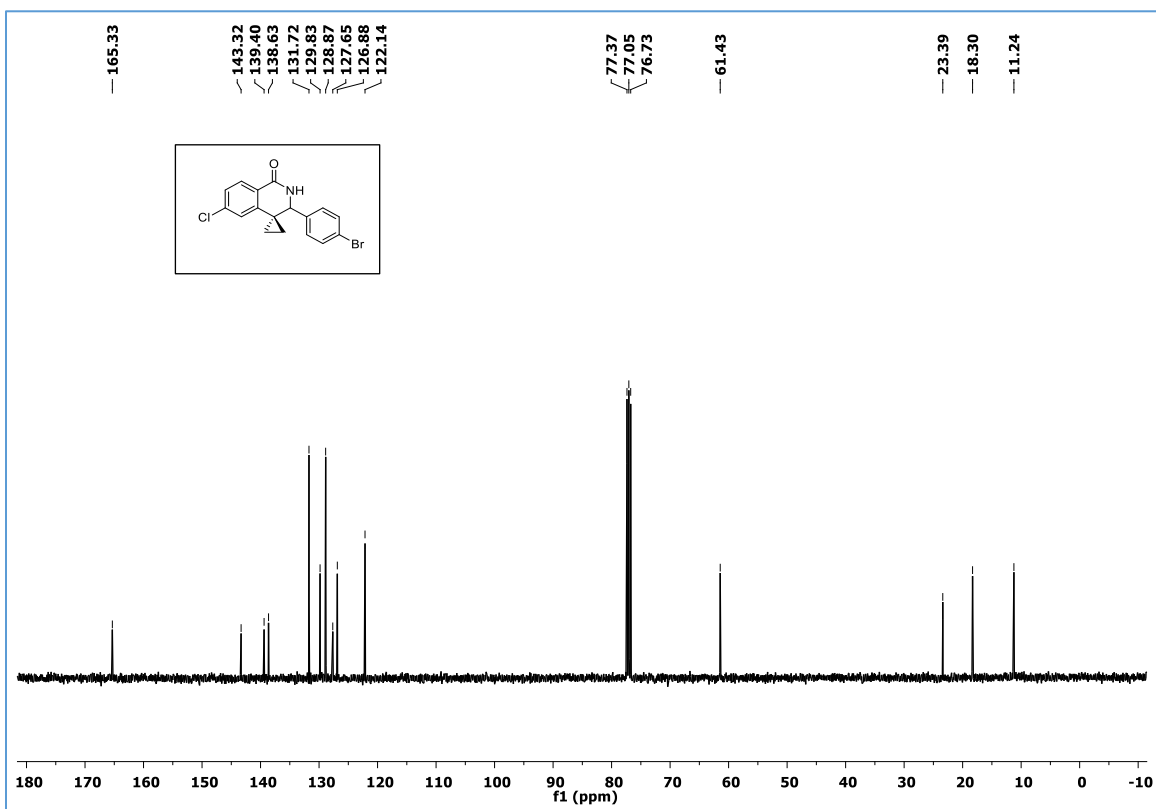

DEPT (135) NMR Spectrum of Compound **3ea**.

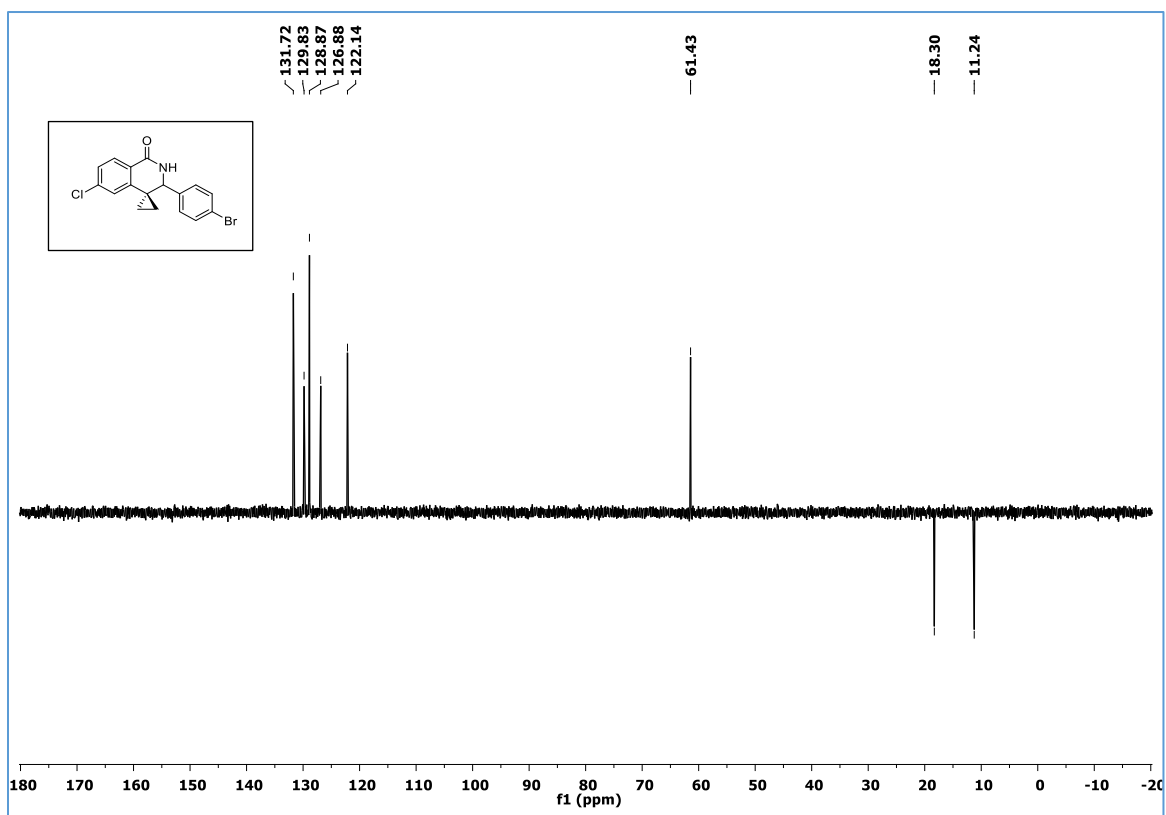

$^1\text{H}$  and  $^{13}\text{C}$  NMR Spectra of Compound **3fa**.

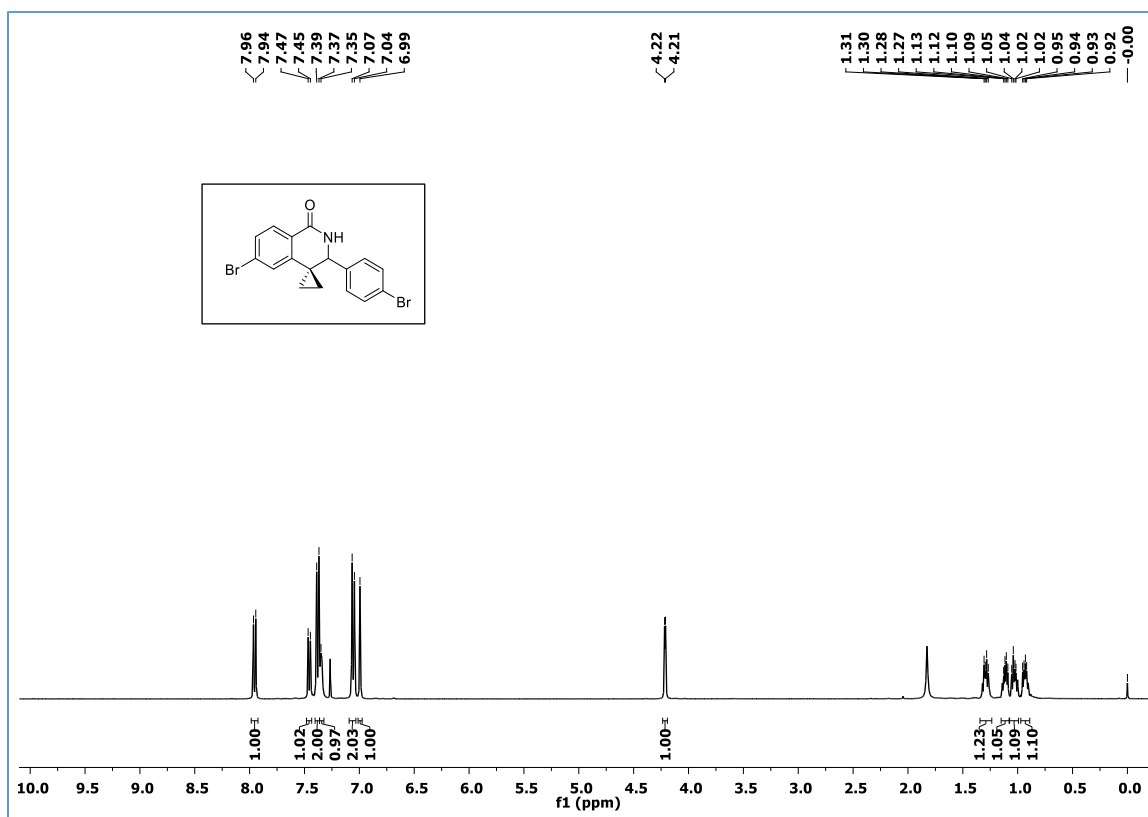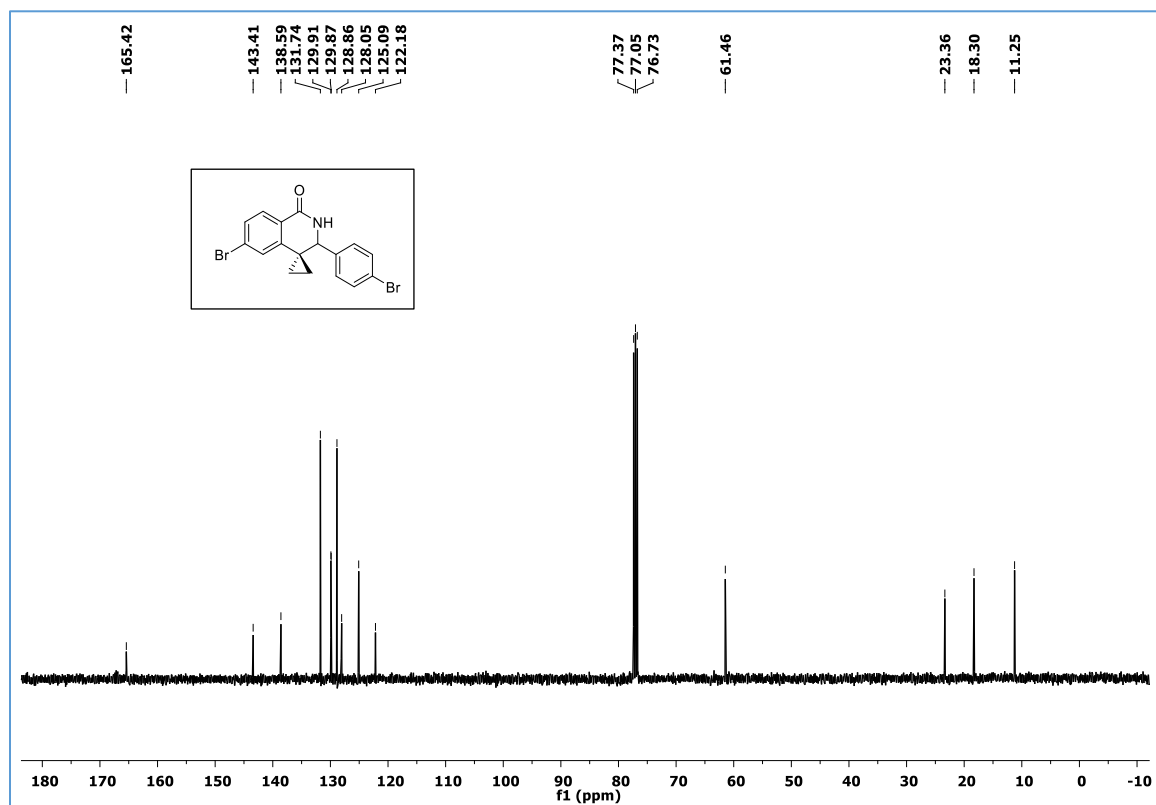

DEPT (135) NMR Spectrum of Compound **3fa**.

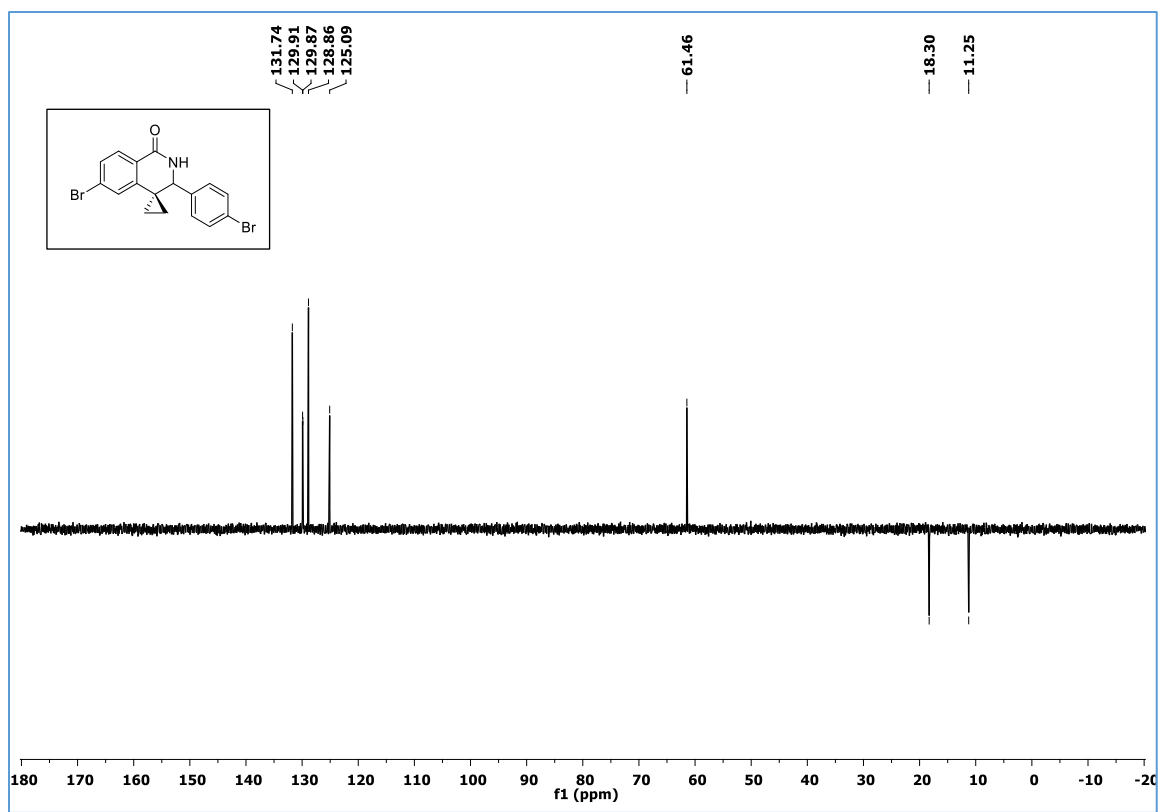

$^1\text{H}$  and  $^{13}\text{C}$  NMR Spectra of Compound **3ga**.

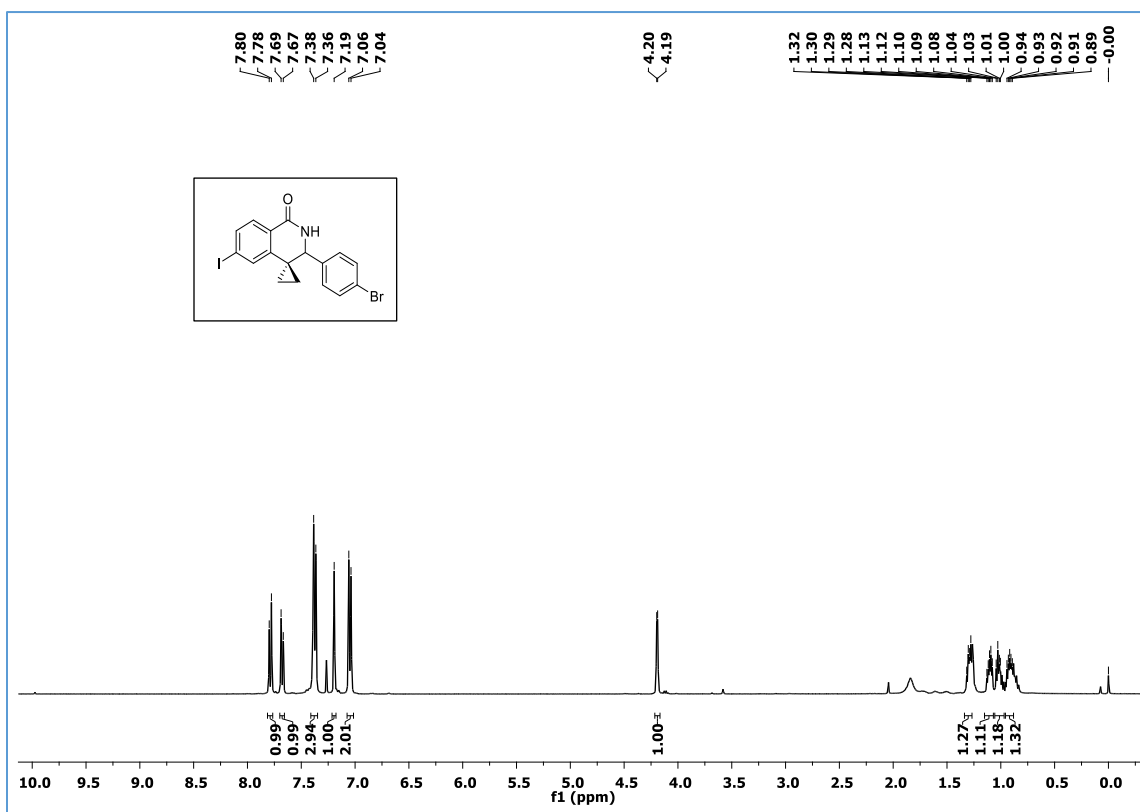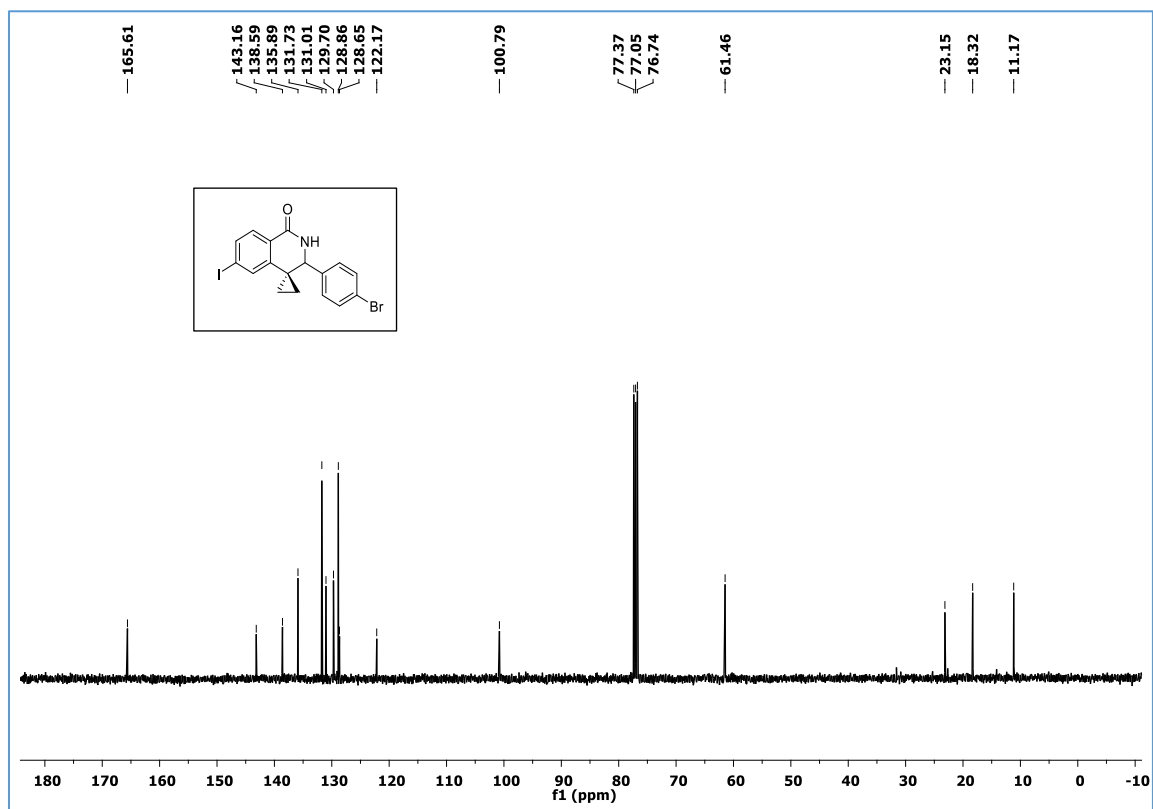

DEPT (135) NMR Spectrum of Compound **3ga**.

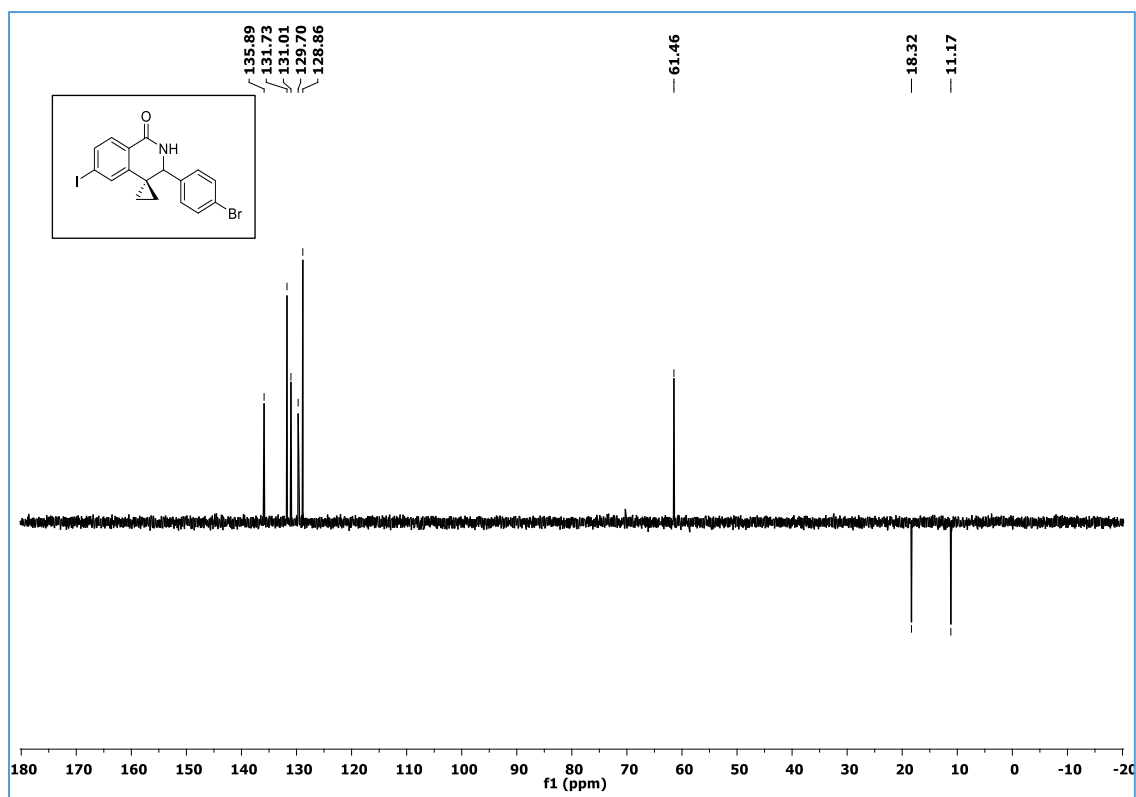



$^1\text{H}$  and  $^{13}\text{C}$  NMR Spectra of Compound **3ha**.

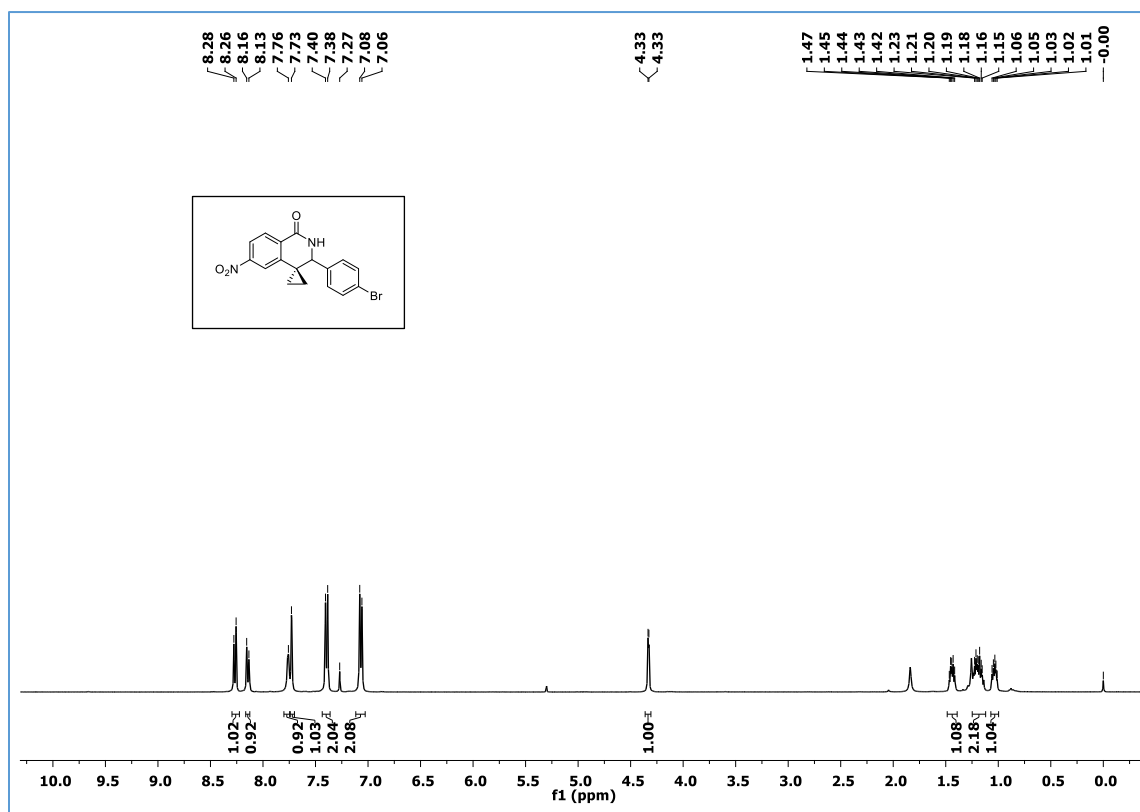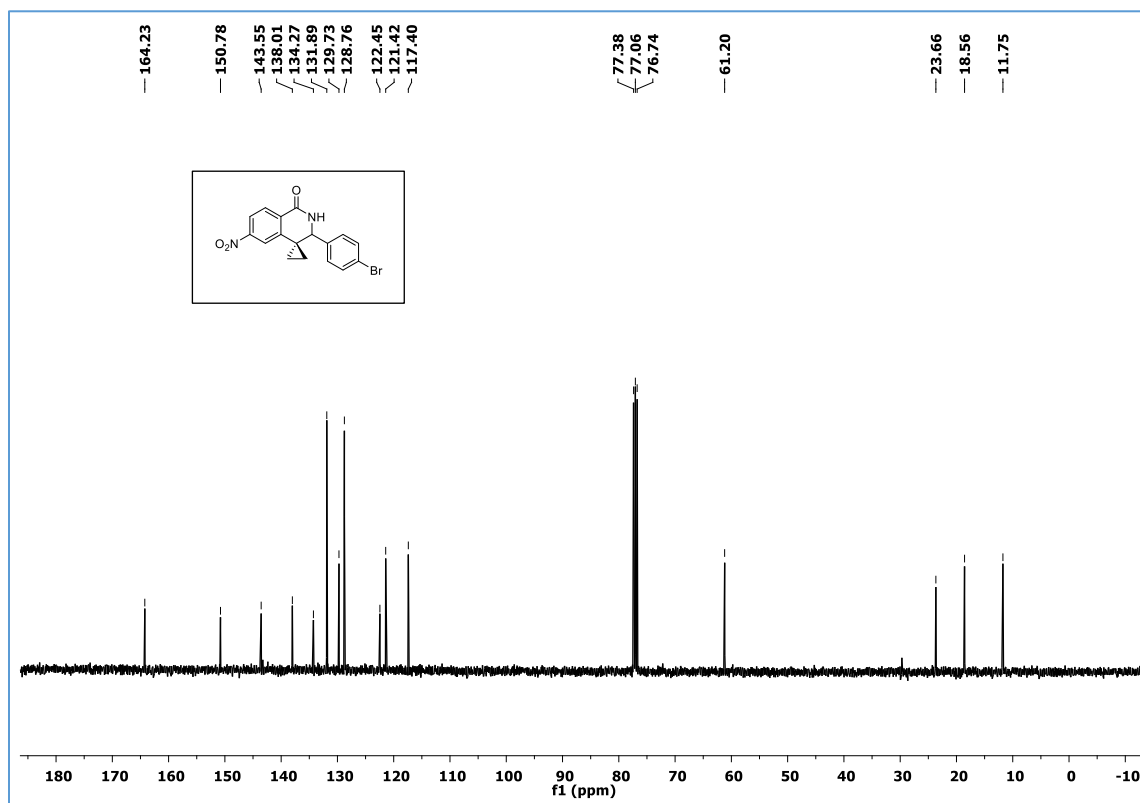

DEPT (135) NMR Spectrum of Compound **3ha**.

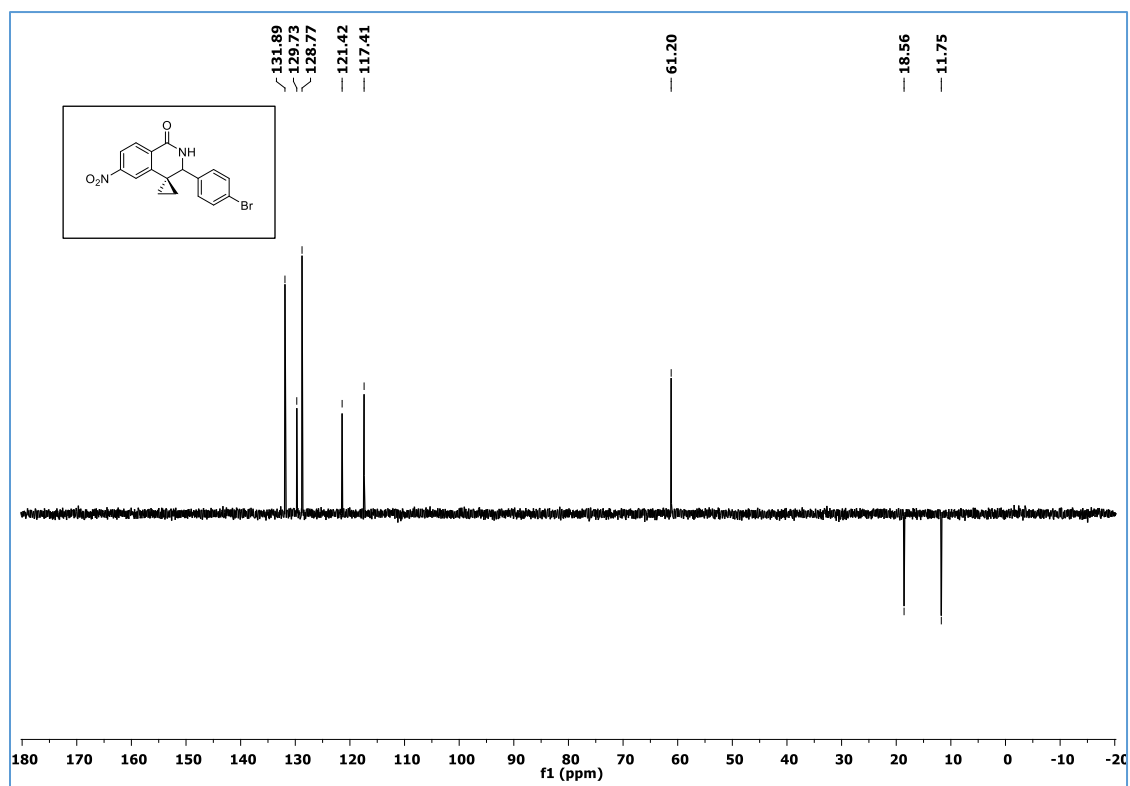

$^1\text{H}$  and  $^{13}\text{C}$  NMR Spectra of Compound **3id**.

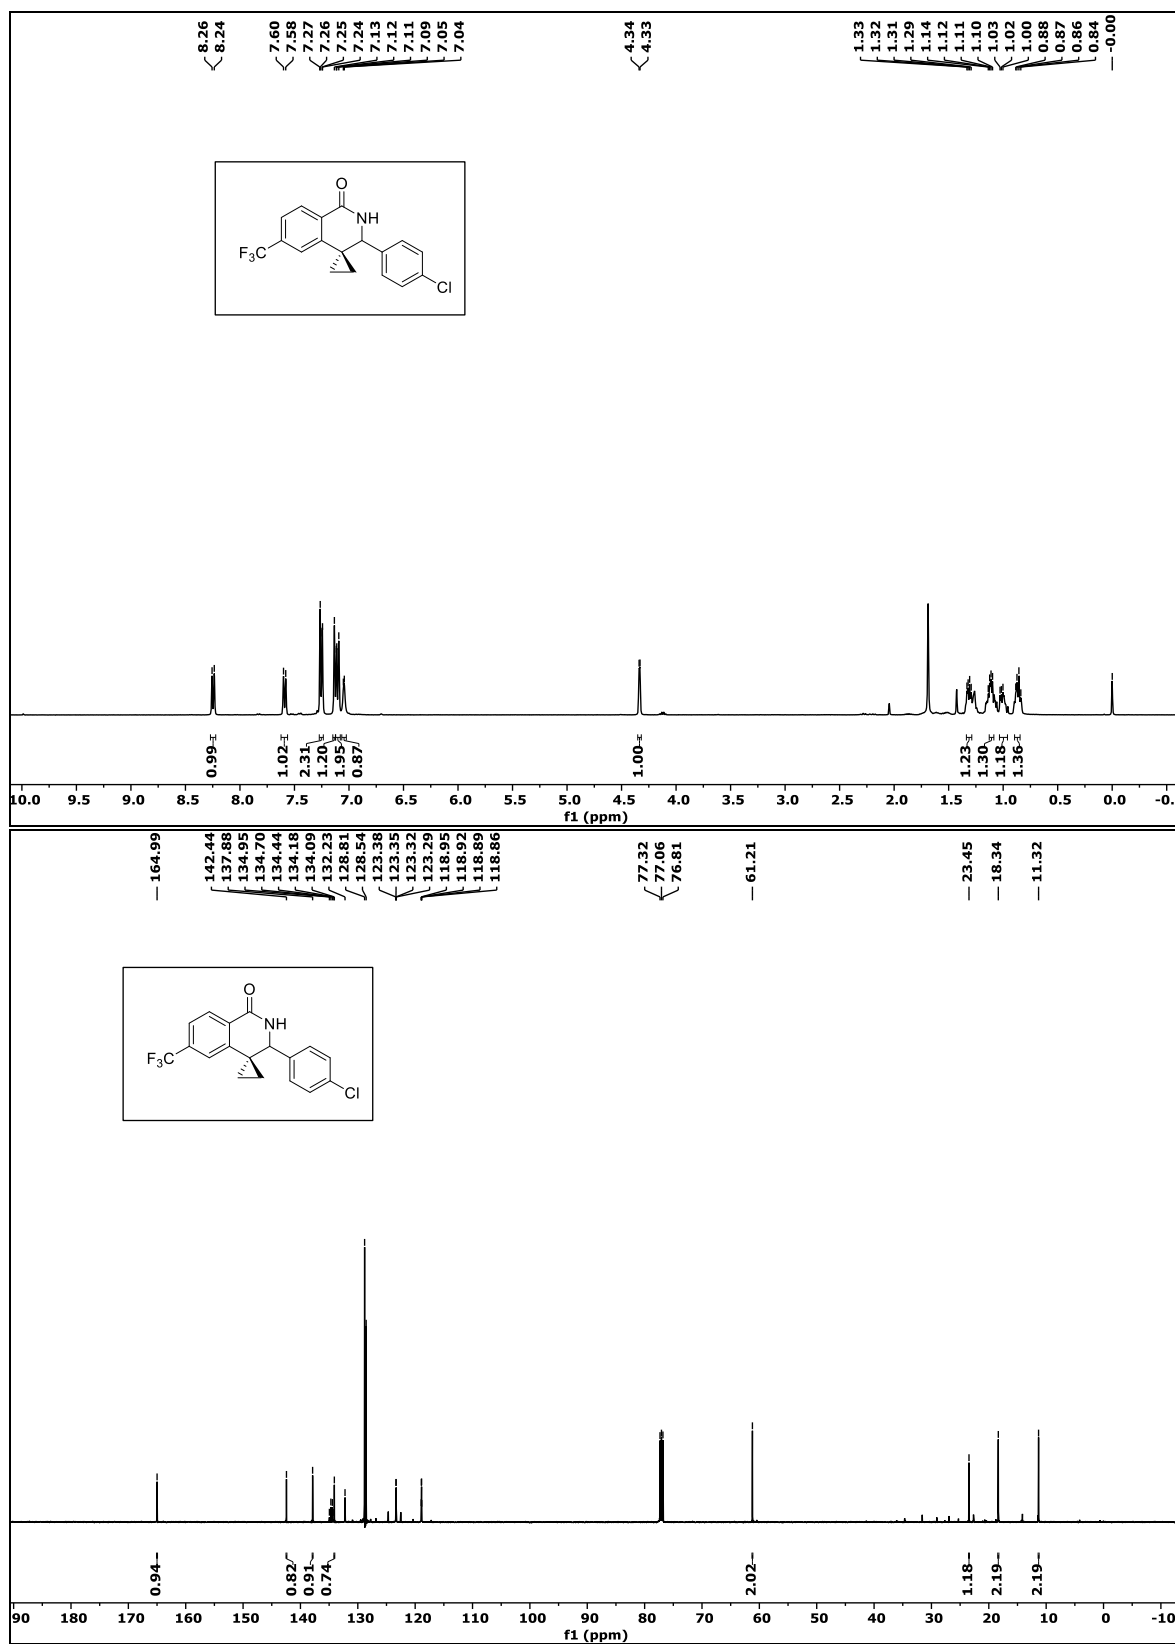

DEPT (135) NMR Spectrum of Compound **3id**.

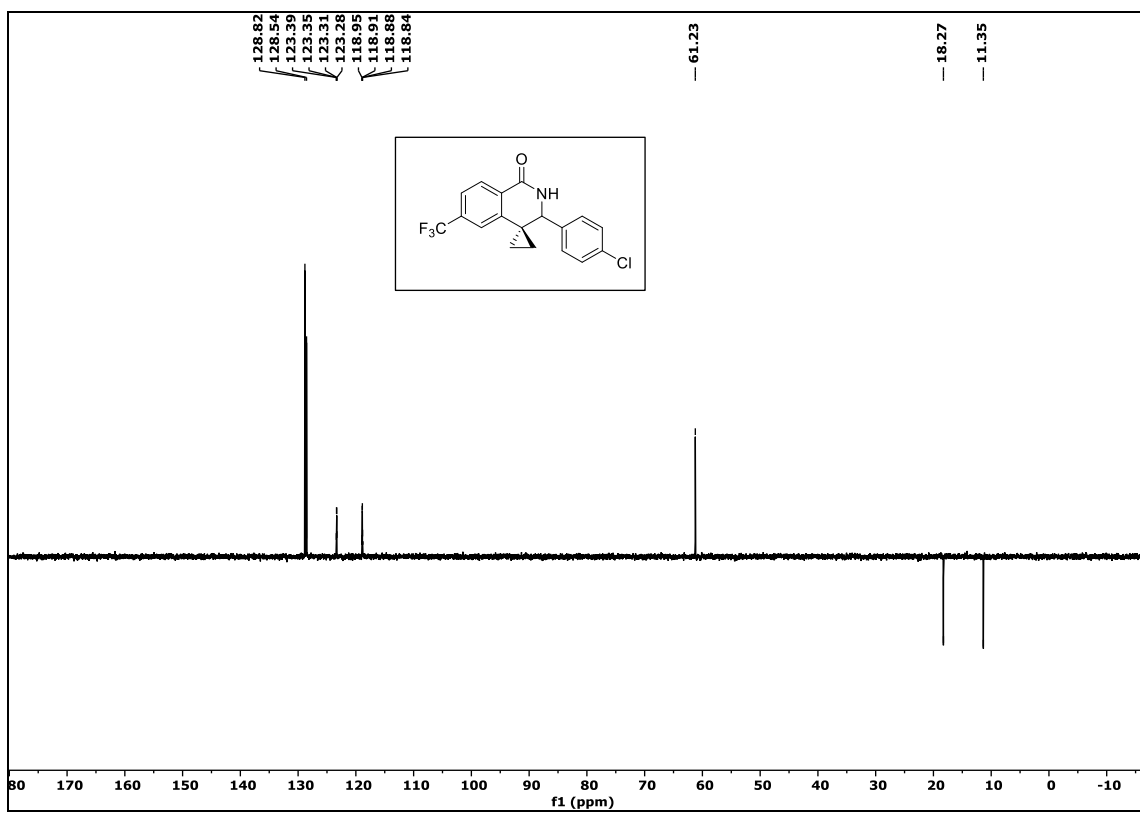

$^1\text{H}$  and  $^{13}\text{C}$  NMR Spectra of Compound **3ja**.

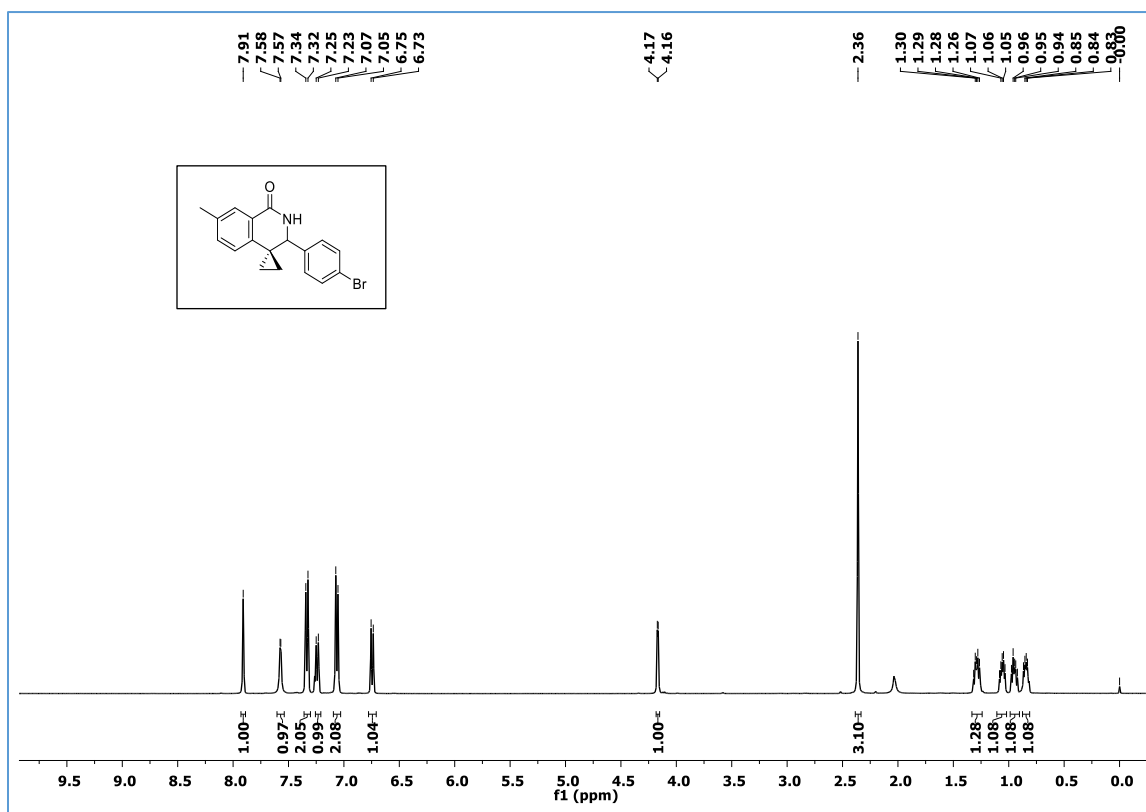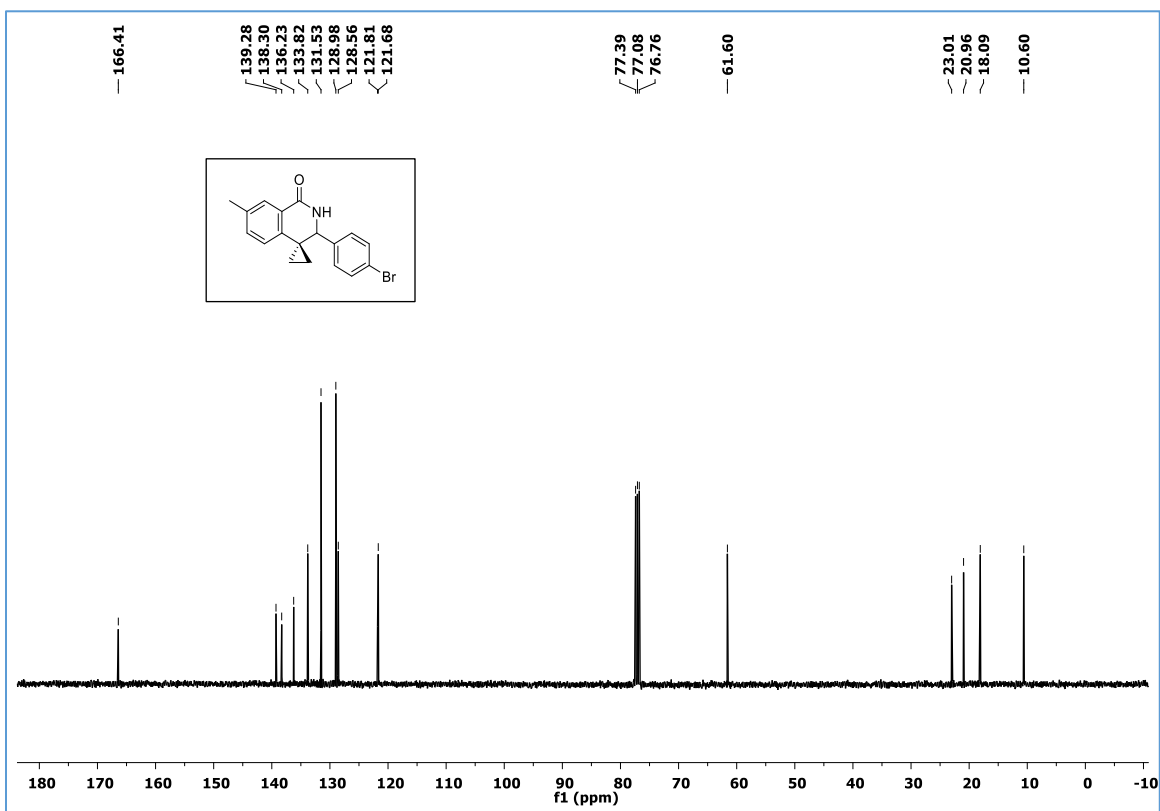

DEPT (135) NMR Spectrum of Compound **3ja**.

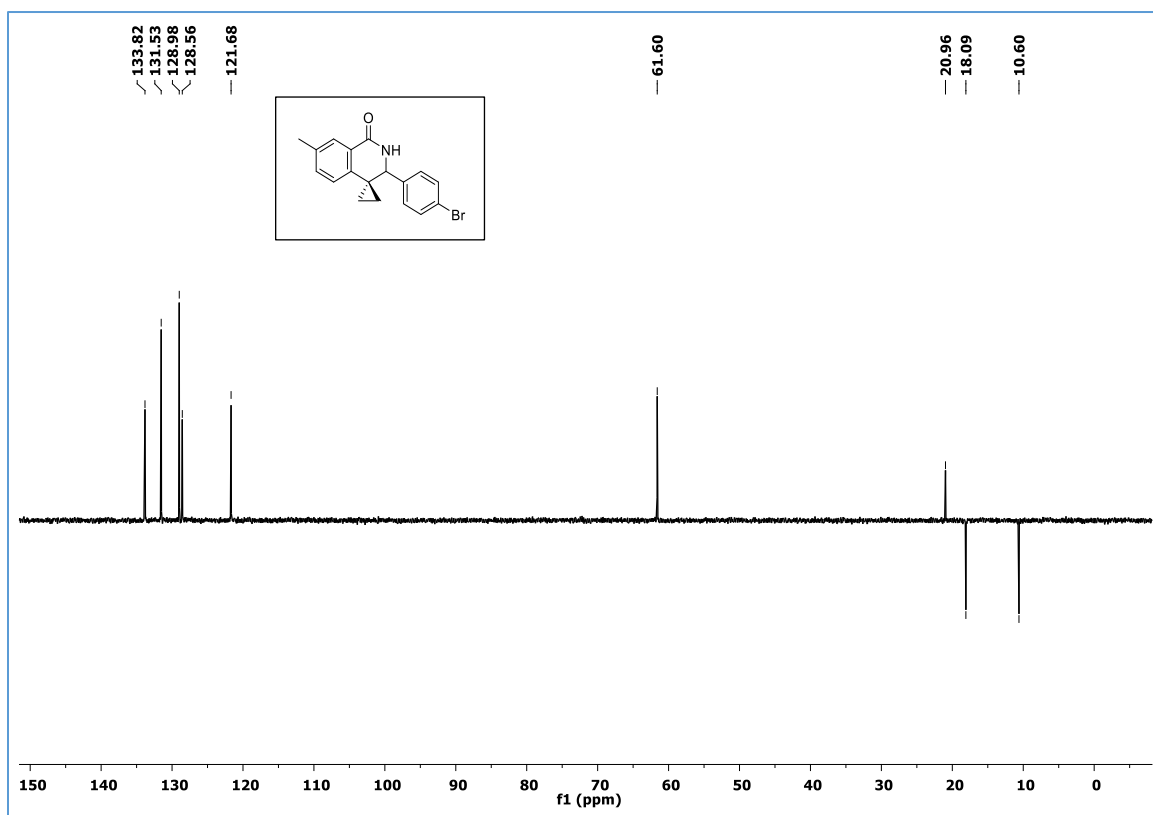

$^1\text{H}$  and  $^{13}\text{C}$  NMR Spectra of Compound **3ka**.

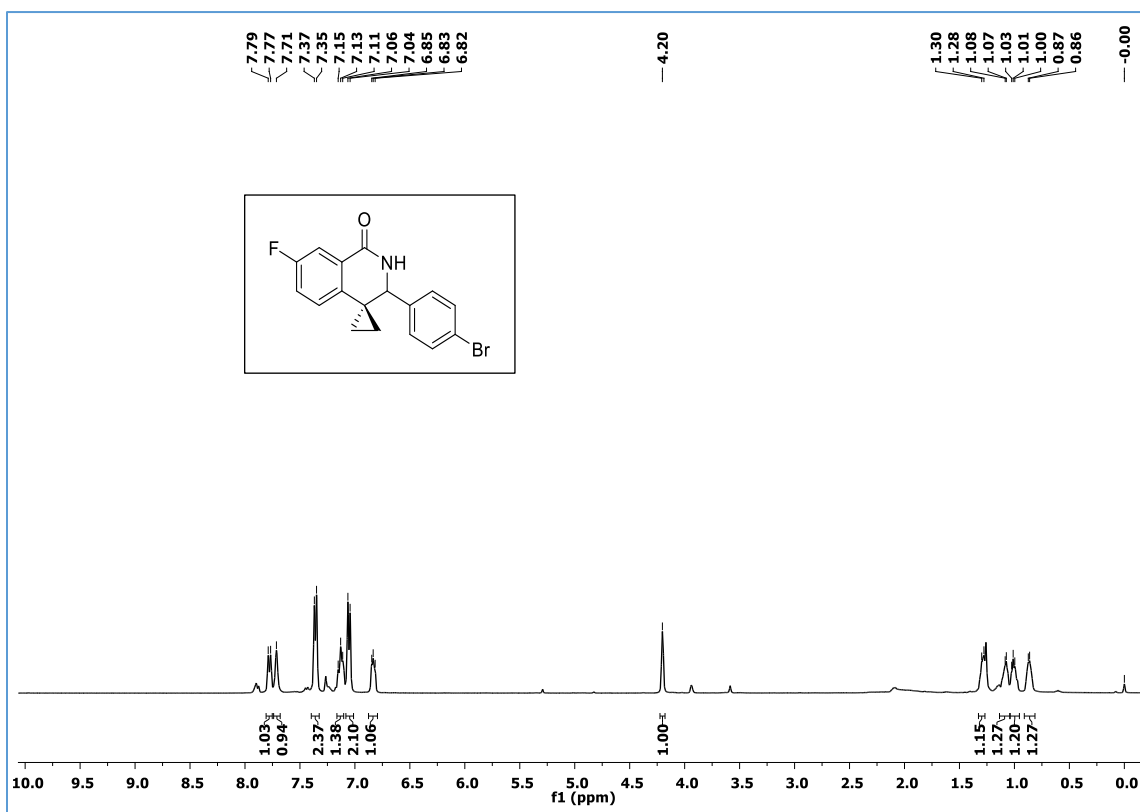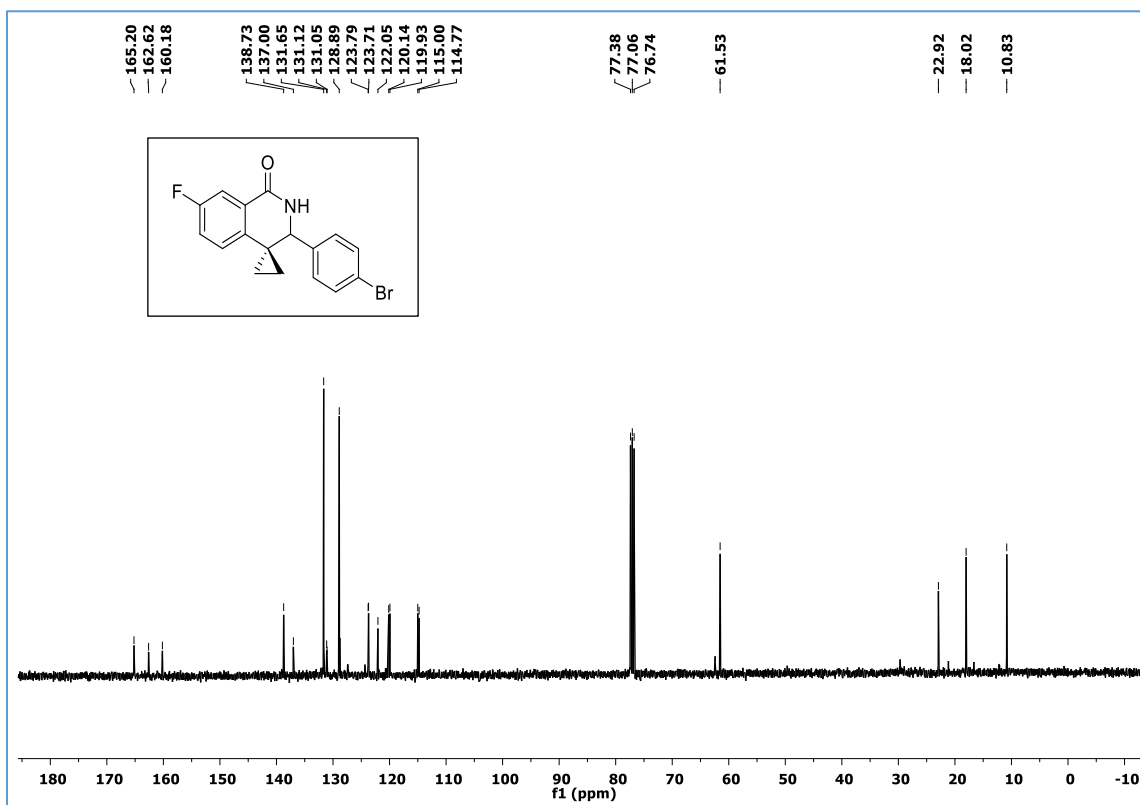

DEPT (135) NMR Spectrum of Compound **3ka**.

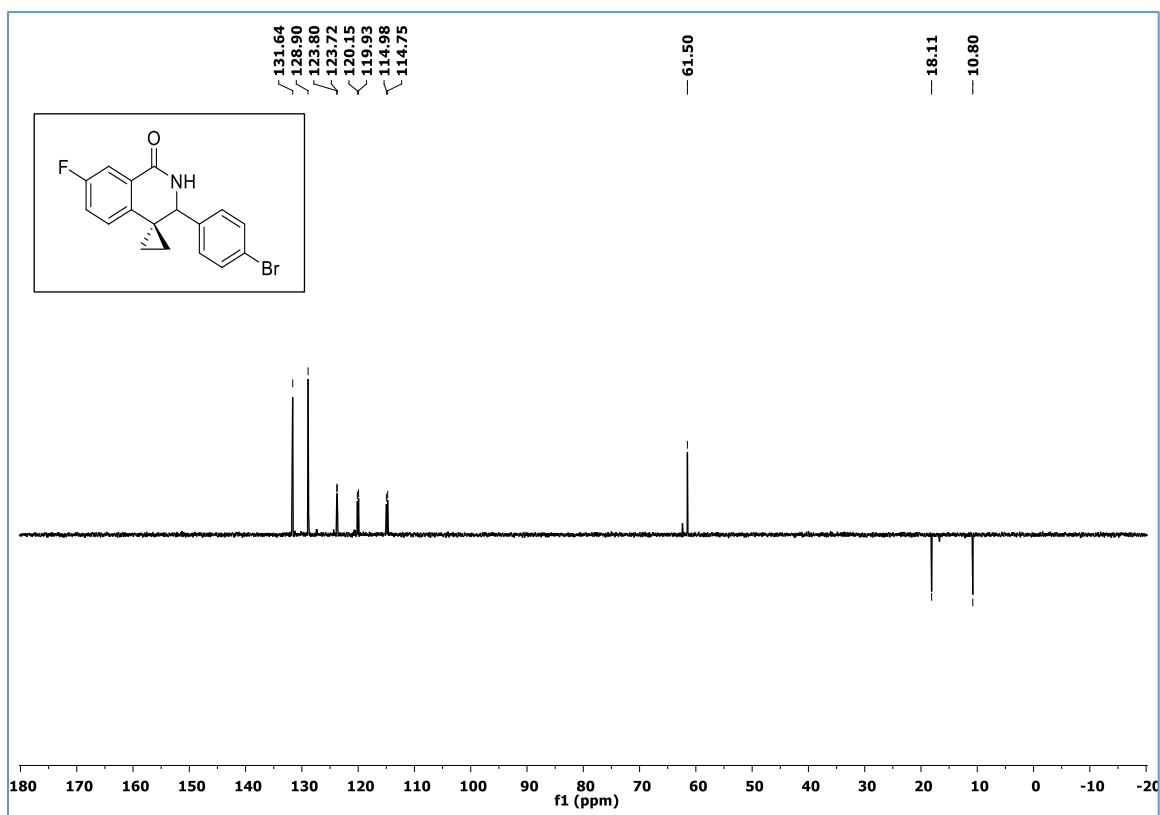



$^1\text{H}$  and  $^{13}\text{C}$  NMR Spectra of Compound **3la**.

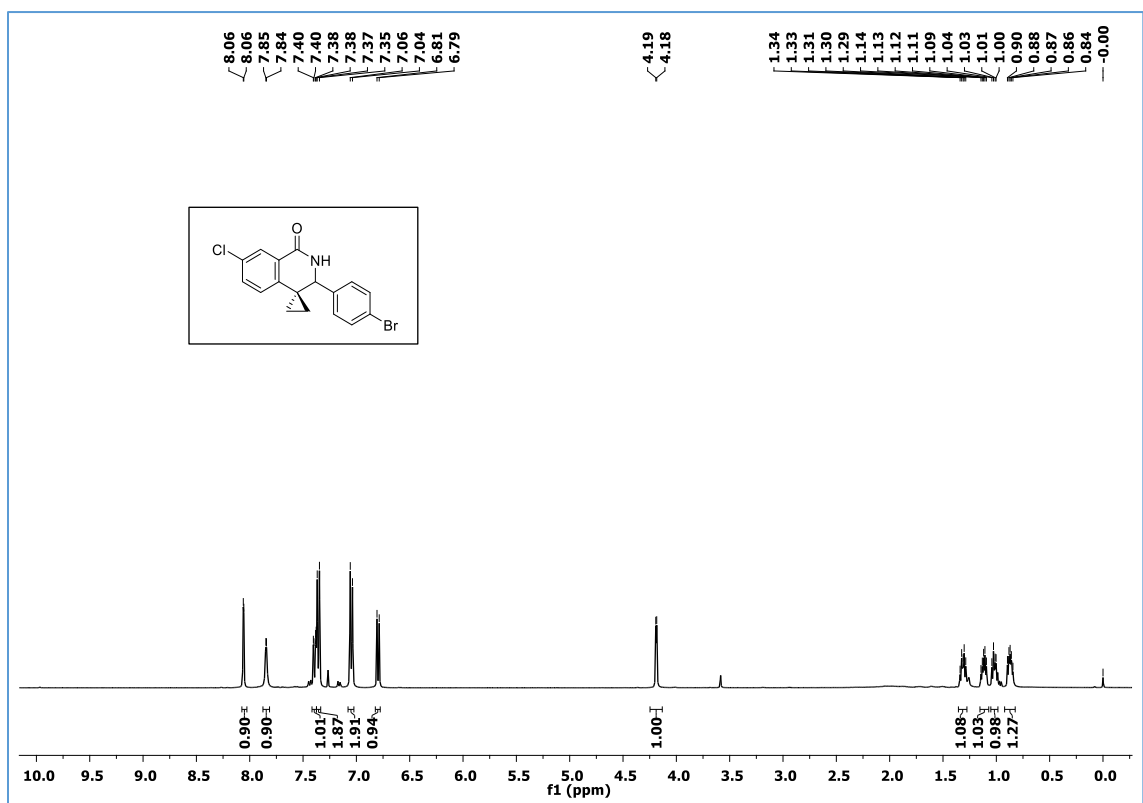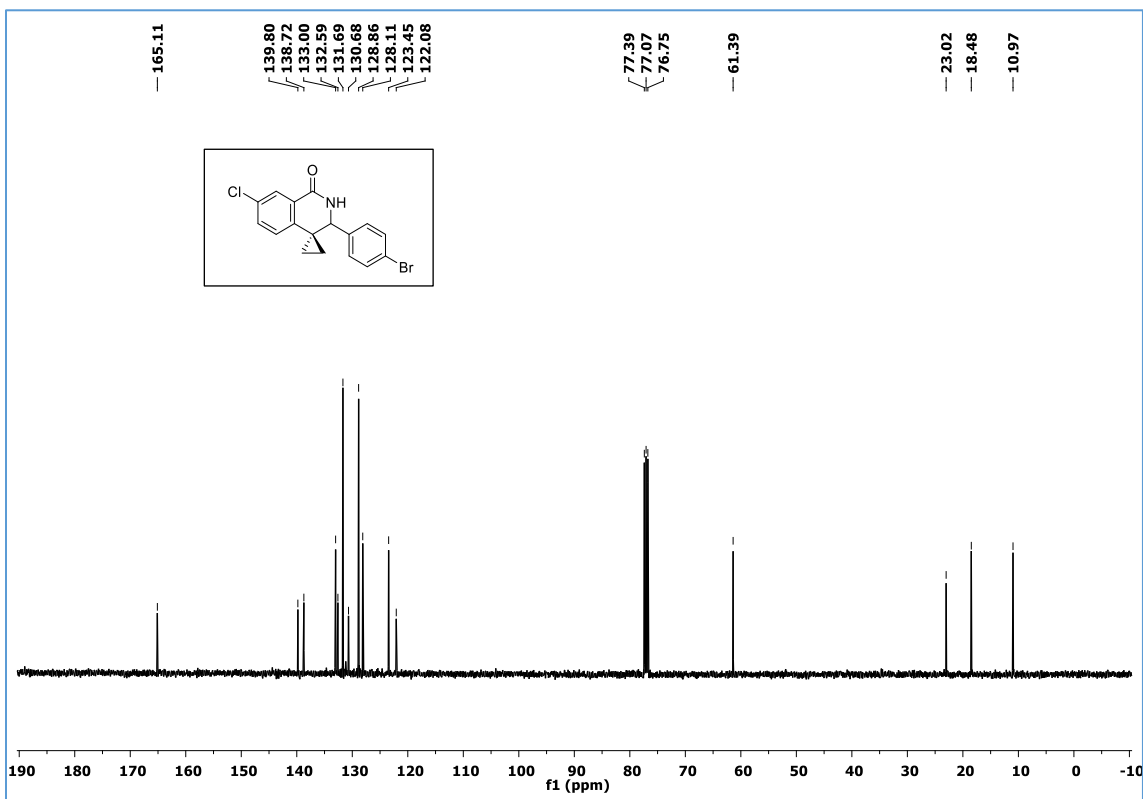

DEPT (135) NMR Spectrum of Compound **3la**.

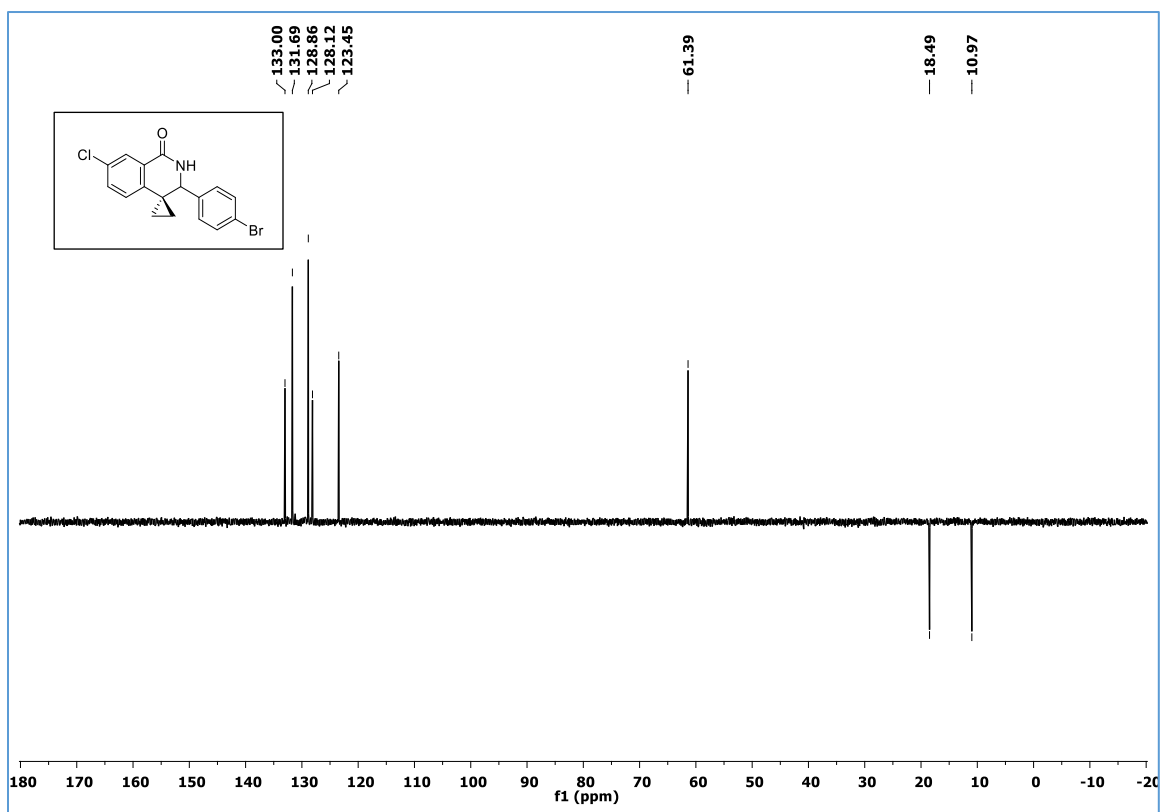

$^1\text{H}$  and  $^{13}\text{C}$  NMR Spectra of Compound **3ma**.

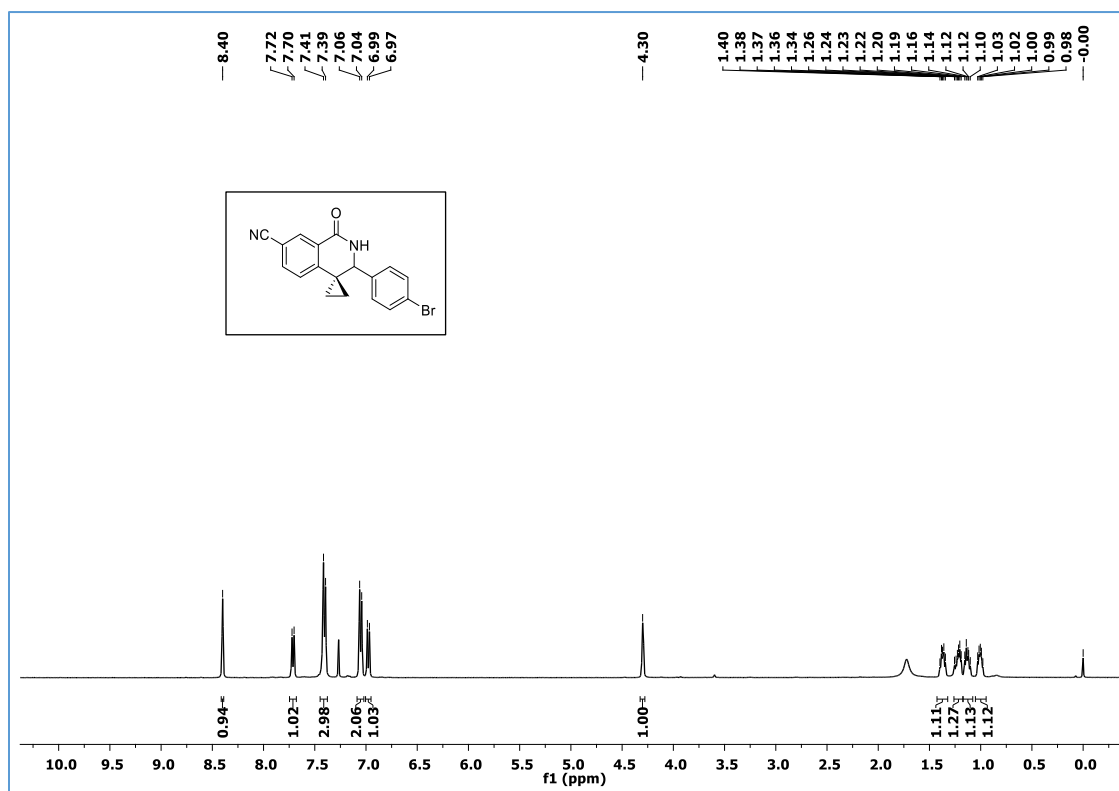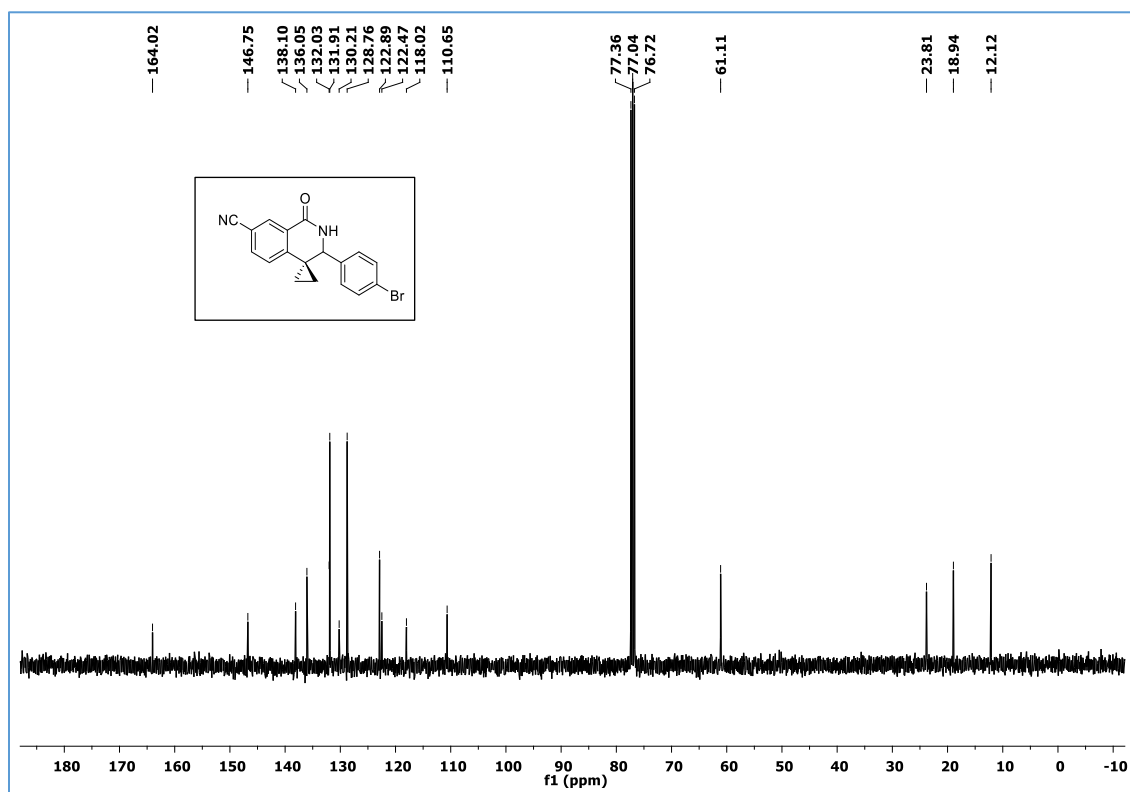

DEPT (135) NMR Spectrum of Compound **3ma**.

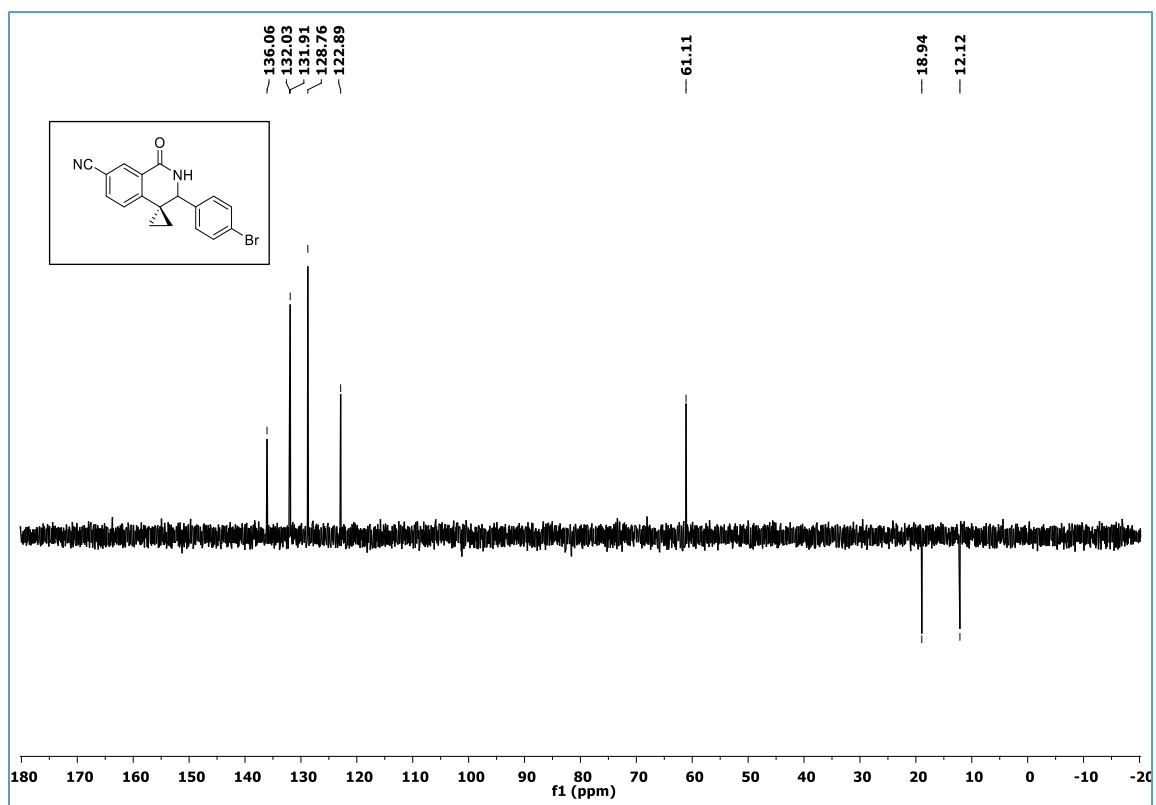

$^1\text{H}$  and  $^{13}\text{C}$  NMR Spectra of Compound **3na**.

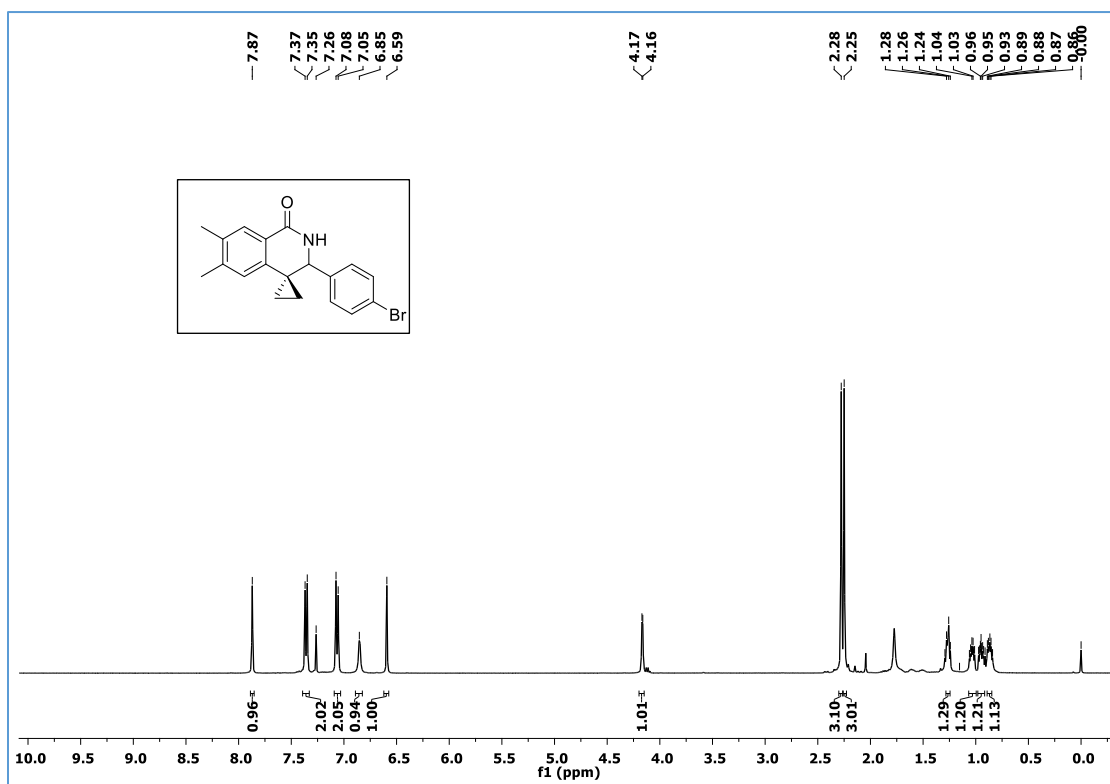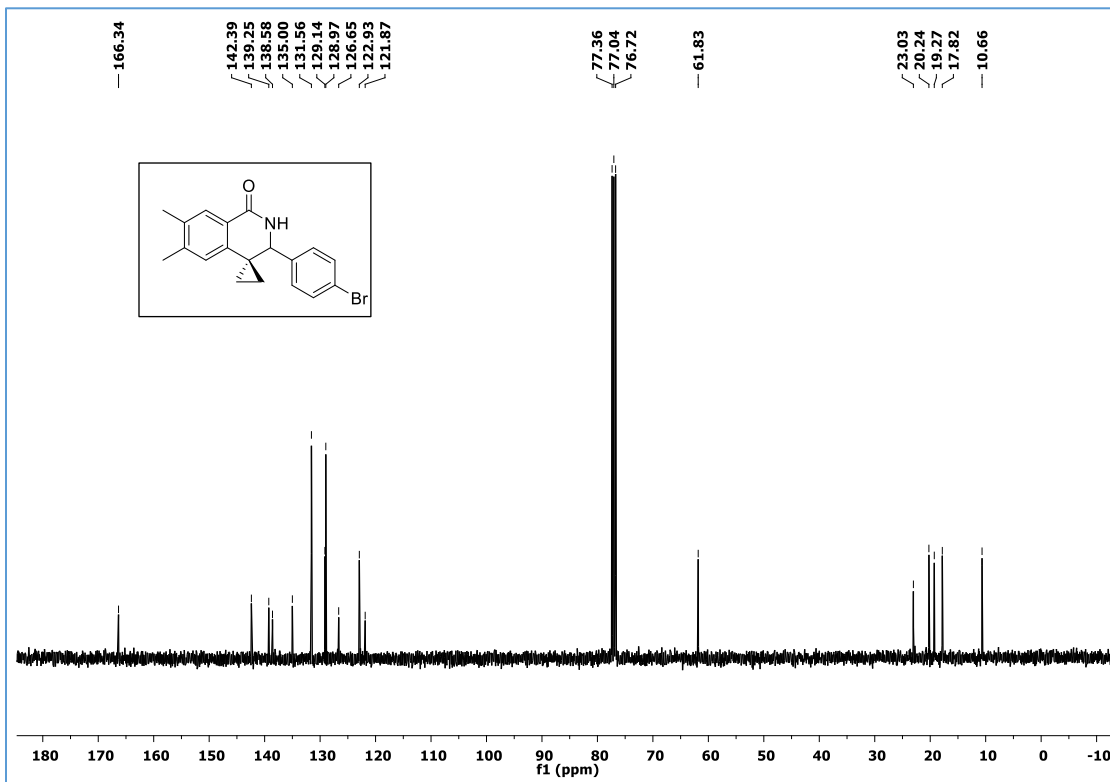

DEPT (135) NMR Spectrum of Compound **3na**.

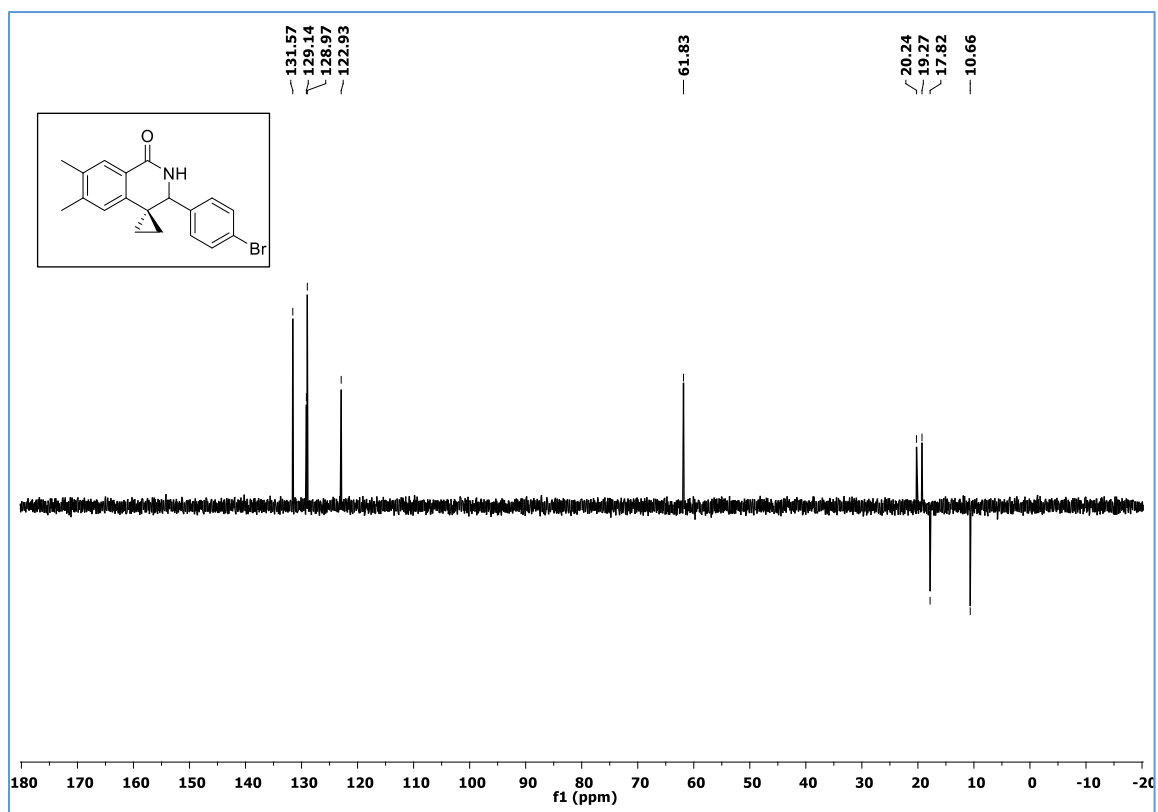

$^1\text{H}$  and  $^{13}\text{C}$  NMR Spectra of Compound **30a**.

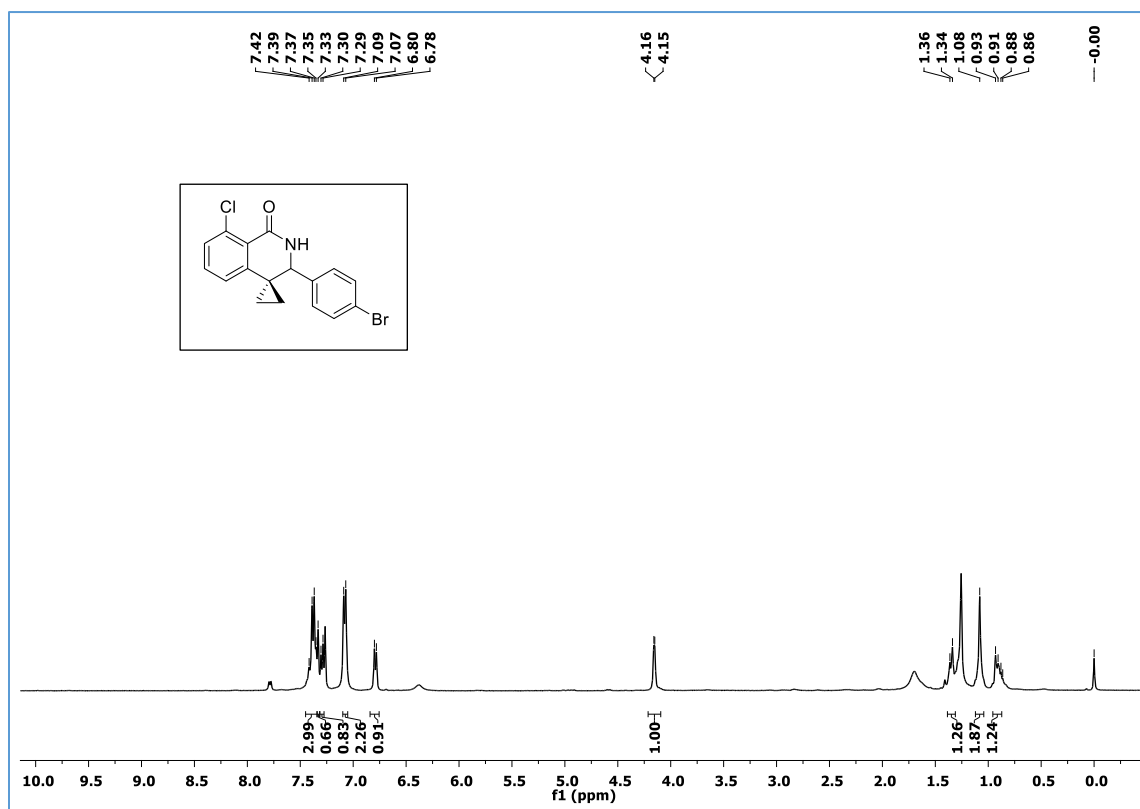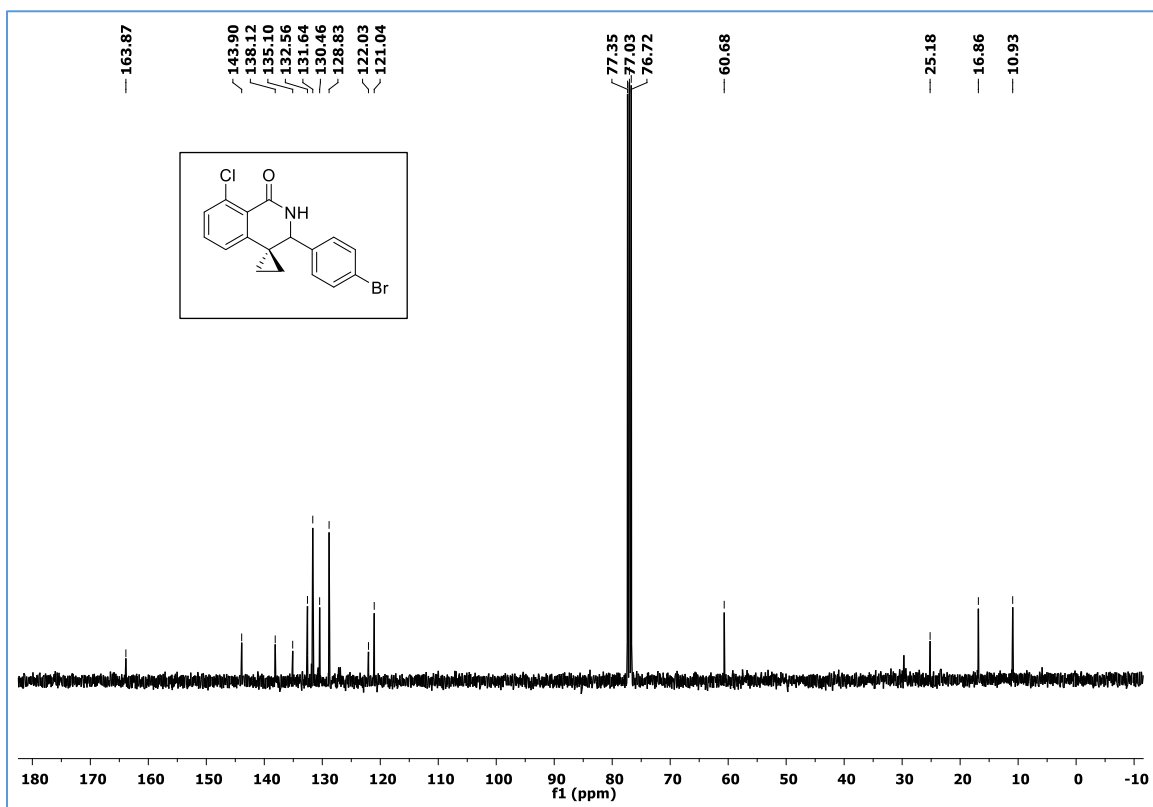

DEPT (135) NMR Spectrum of Compound **30a**.

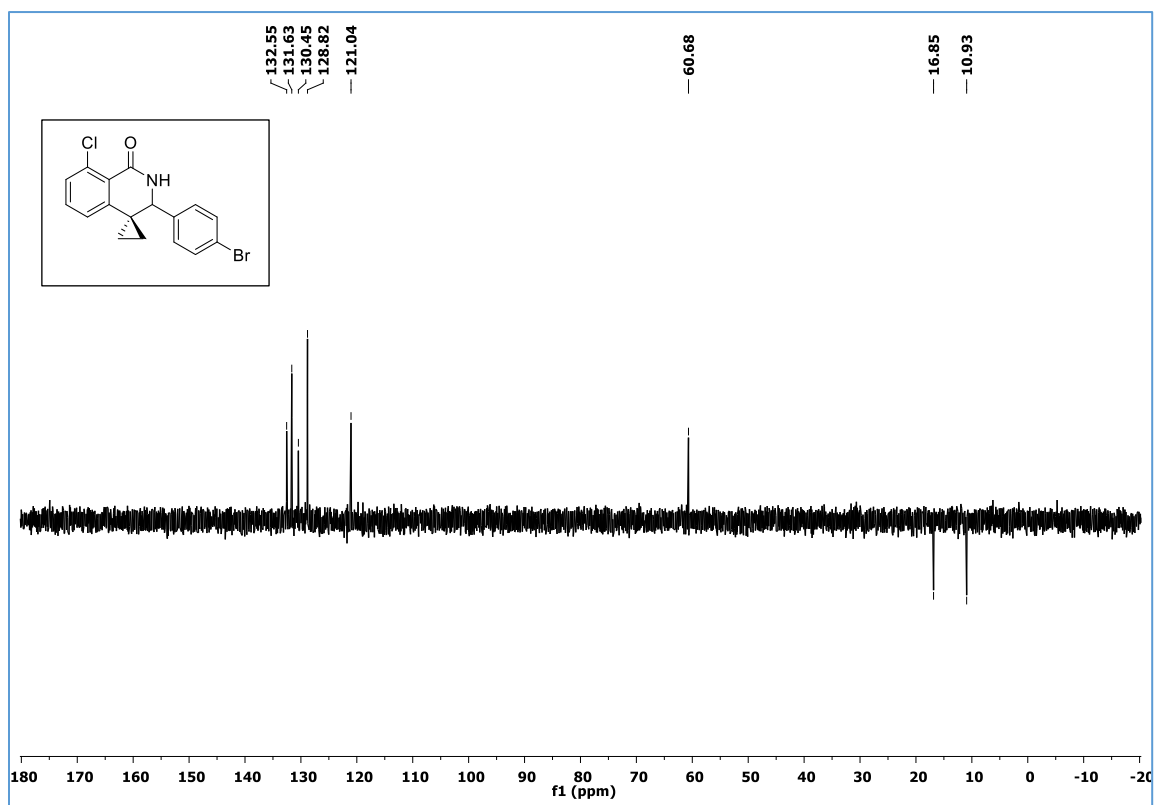



$^1\text{H}$  and  $^{13}\text{C}$  NMR Spectra of Compound **3pa**.

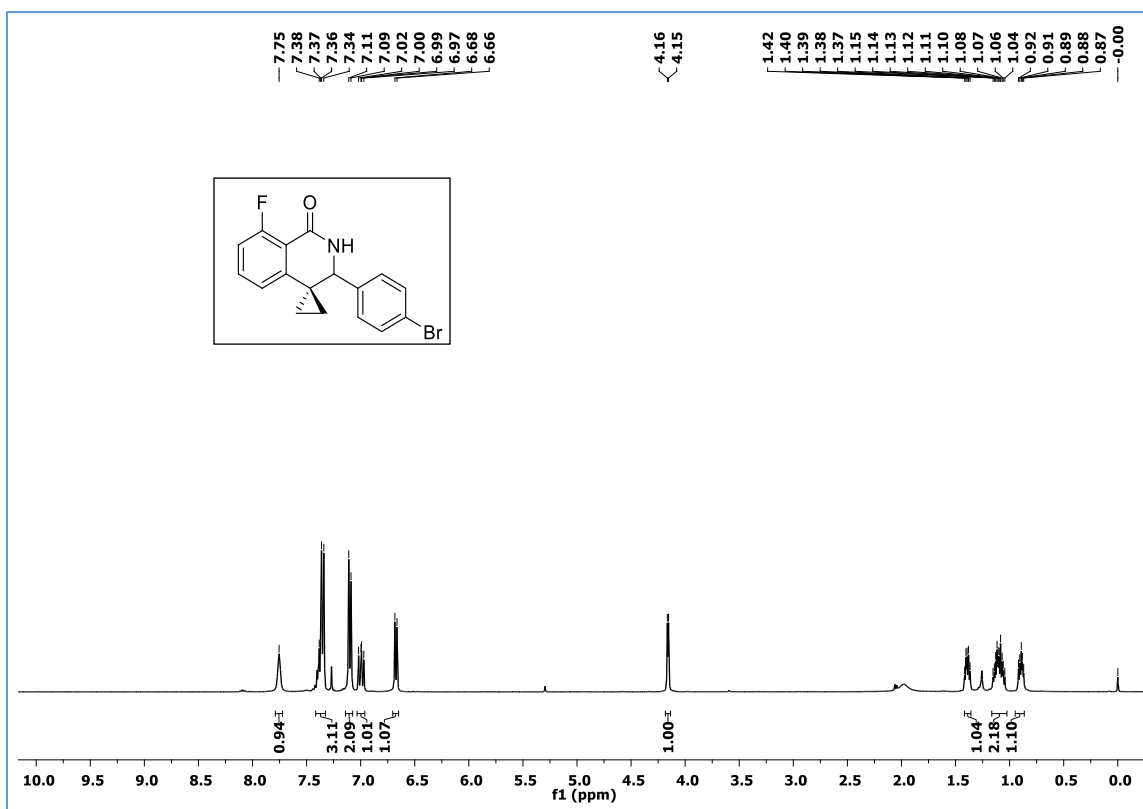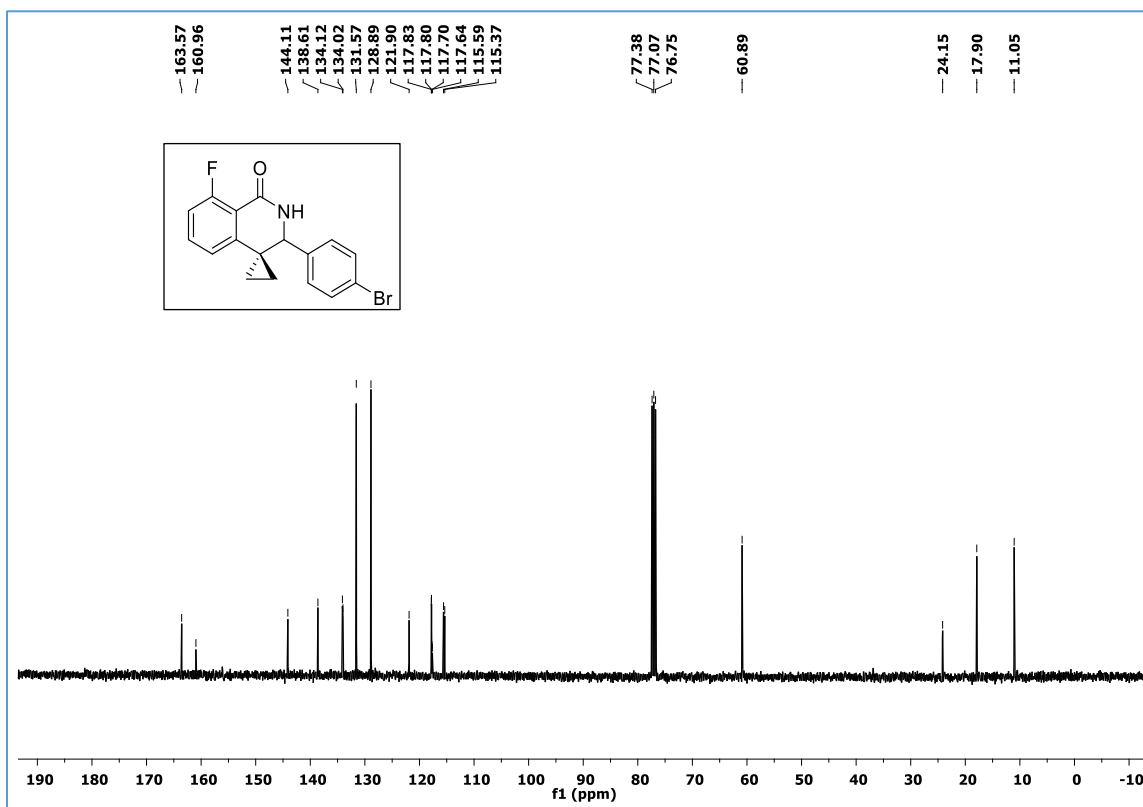

DEPT (135) NMR Spectrum of Compound **3pa**.

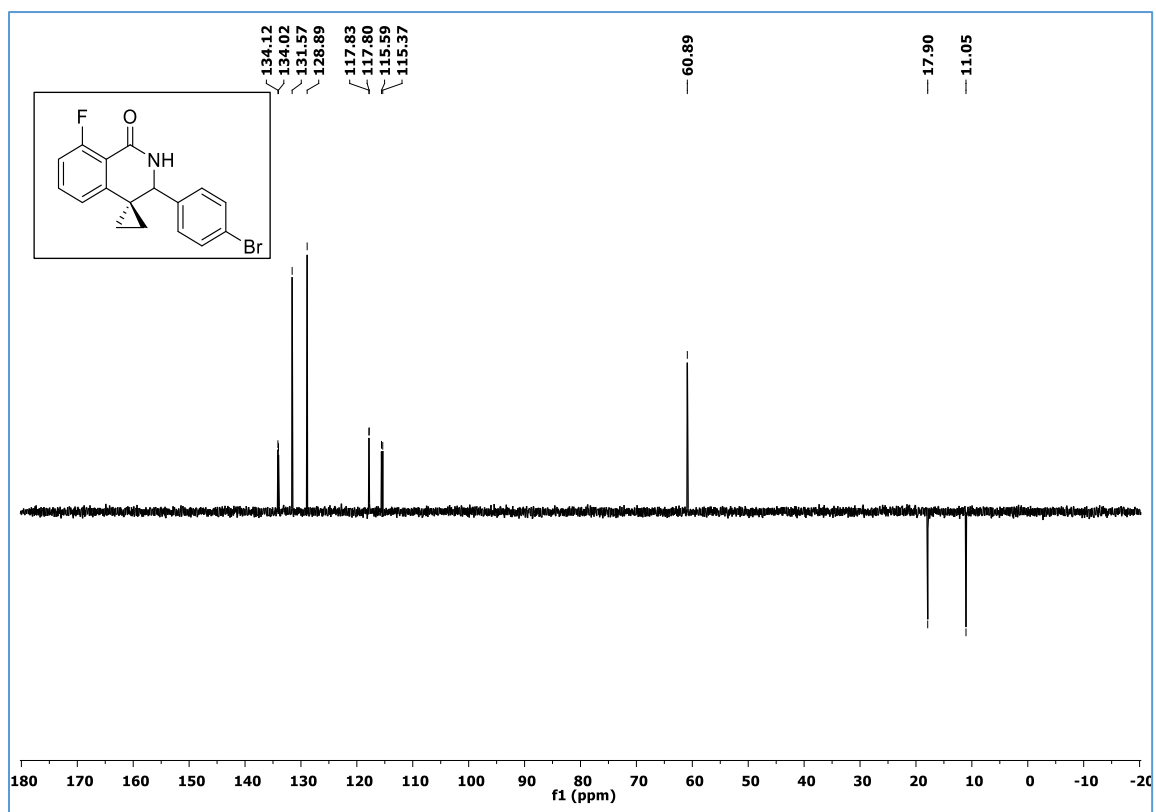

$^1\text{H}$  and  $^{13}\text{C}$  NMR Spectra of Compound **3ab**.

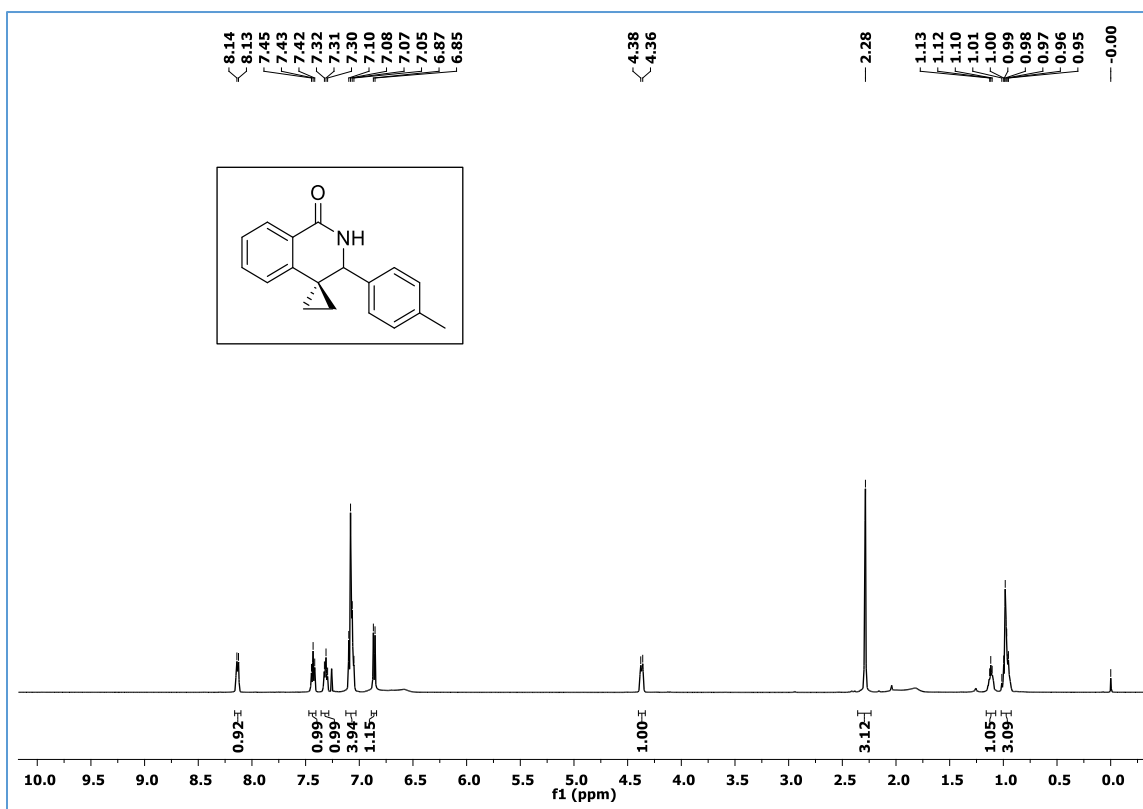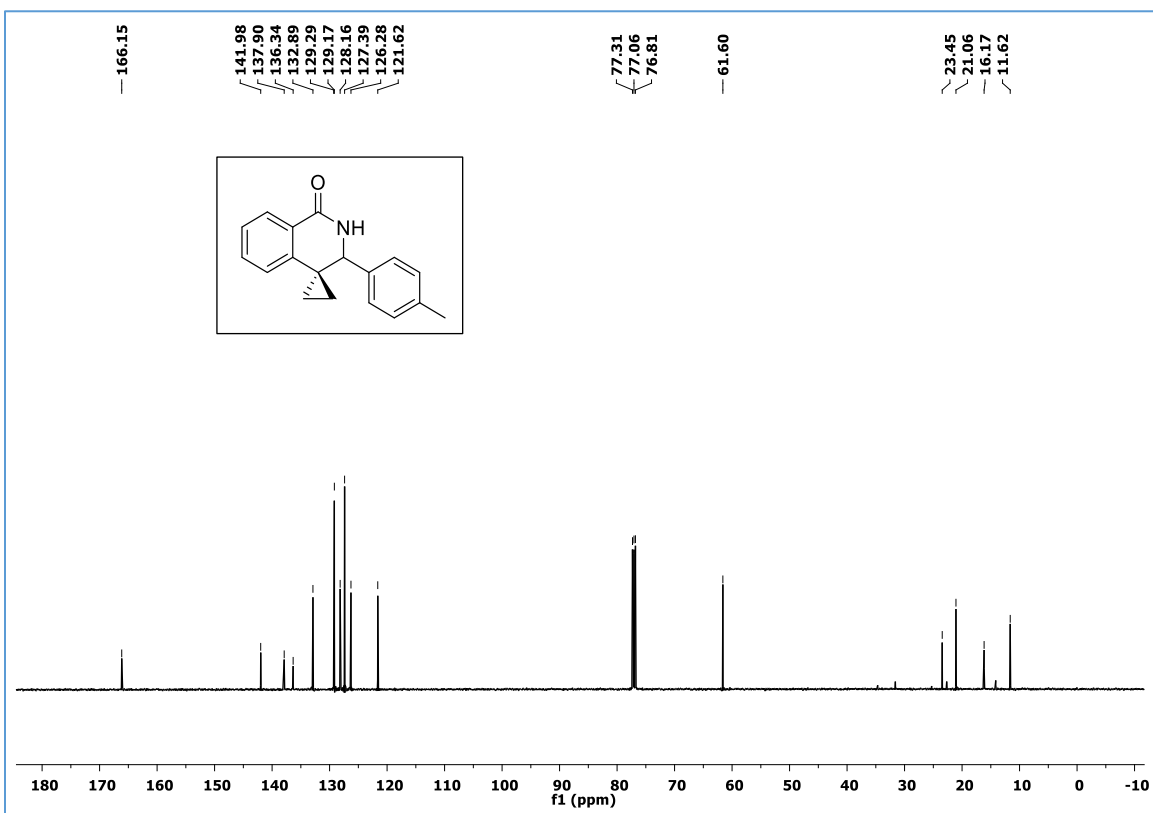

DEPT (135) NMR Spectrum of Compound **3ab**.

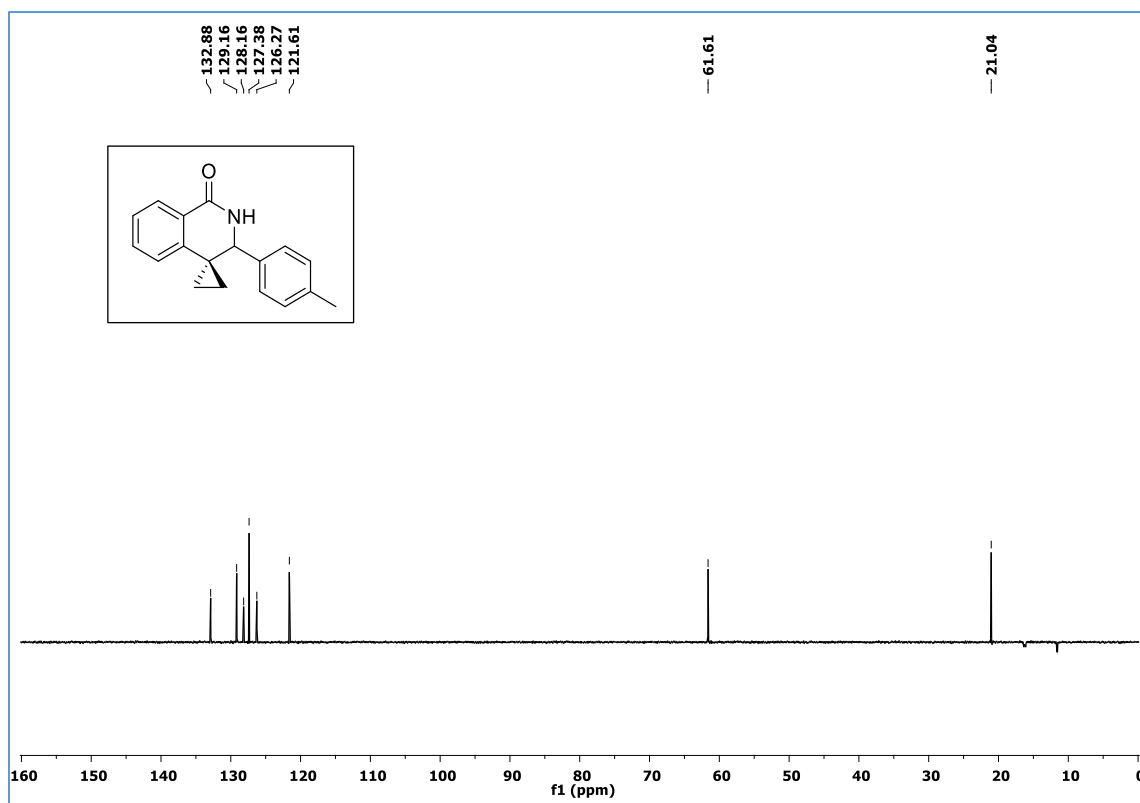

$^1\text{H}$  and  $^{13}\text{C}$  NMR Spectra of Compound **3ac**.

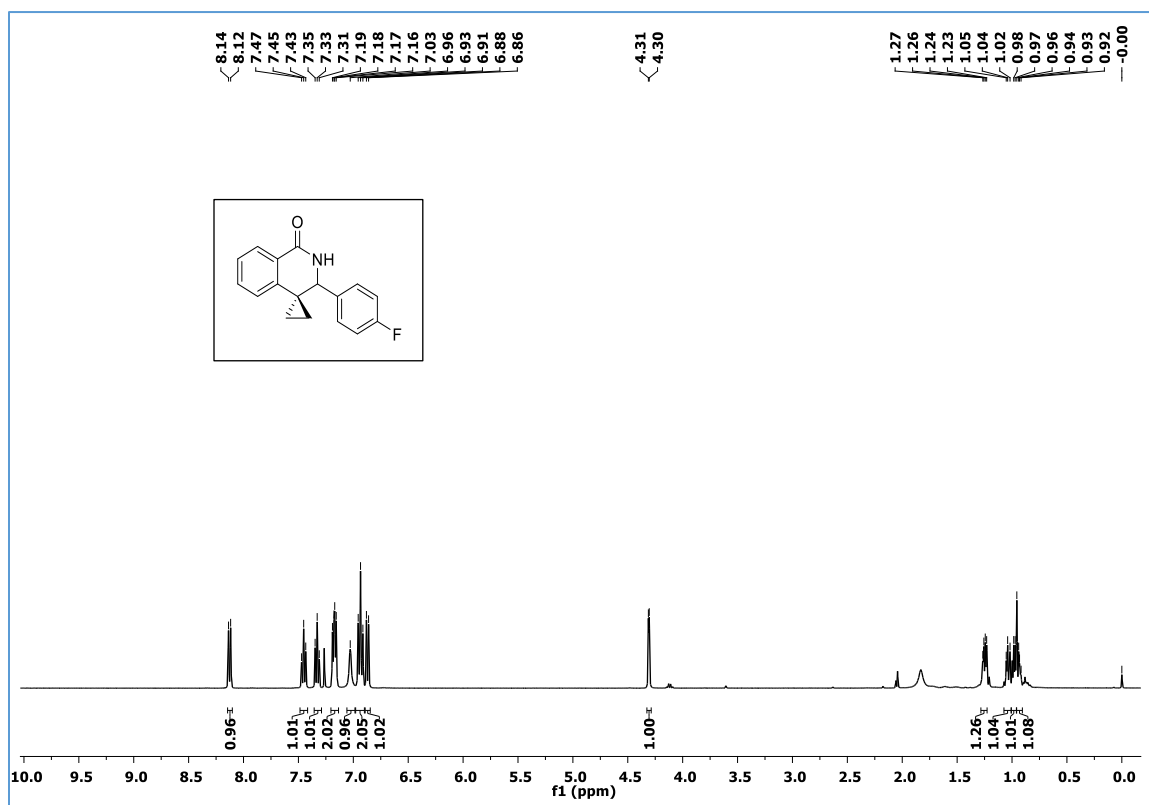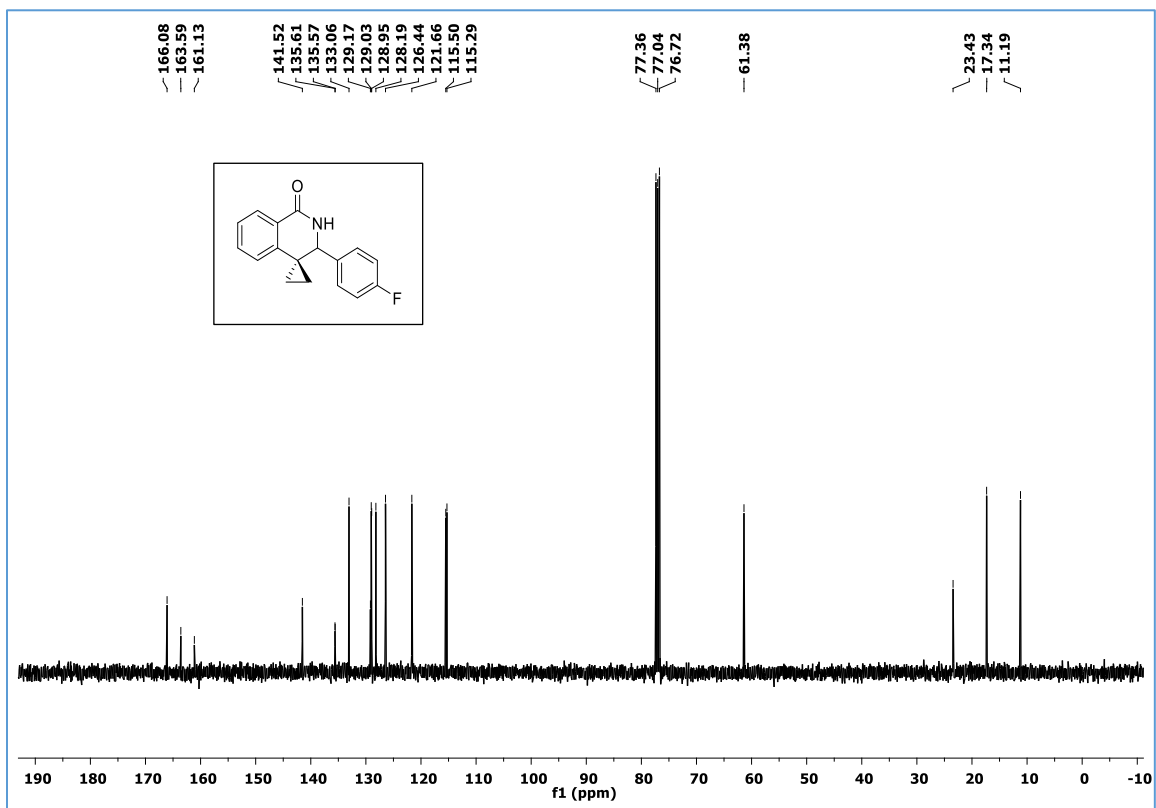

DEPT (135) NMR Spectrum of Compound **3ac**.

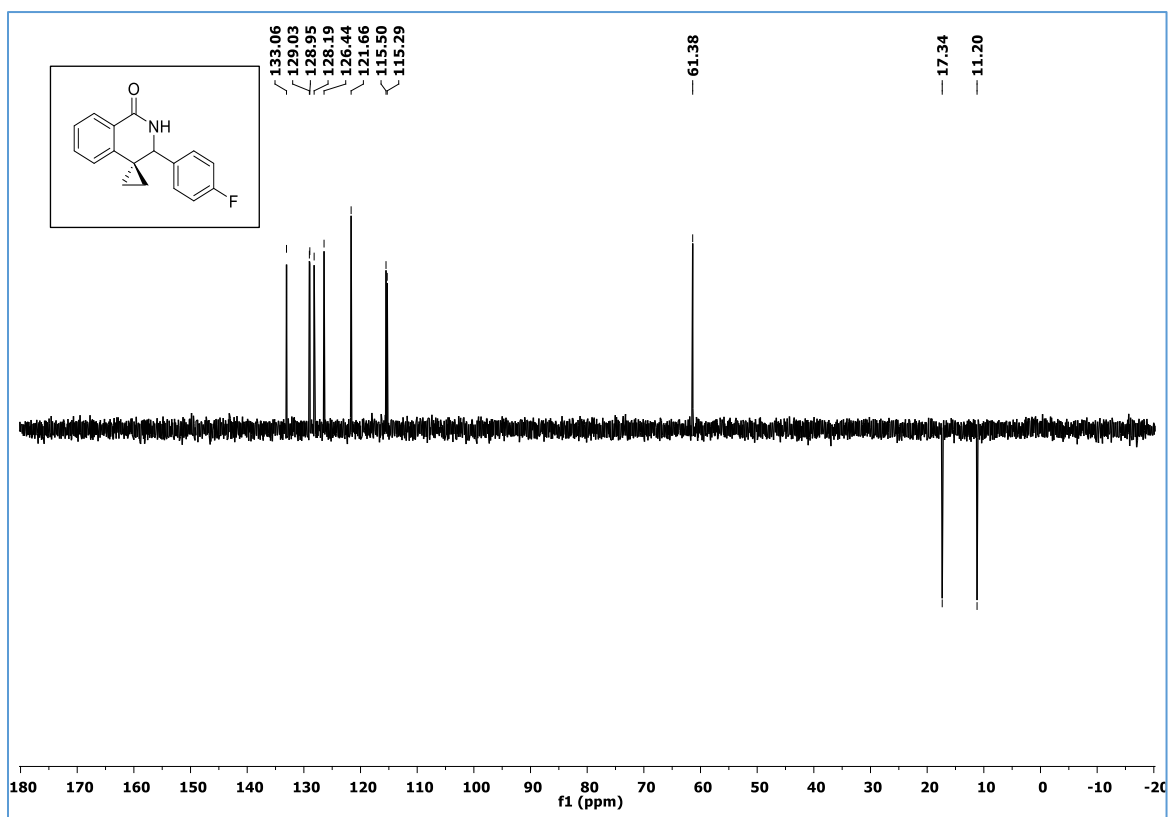

$^1\text{H}$  and  $^{13}\text{C}$  NMR Spectra of Compound **3ad**.

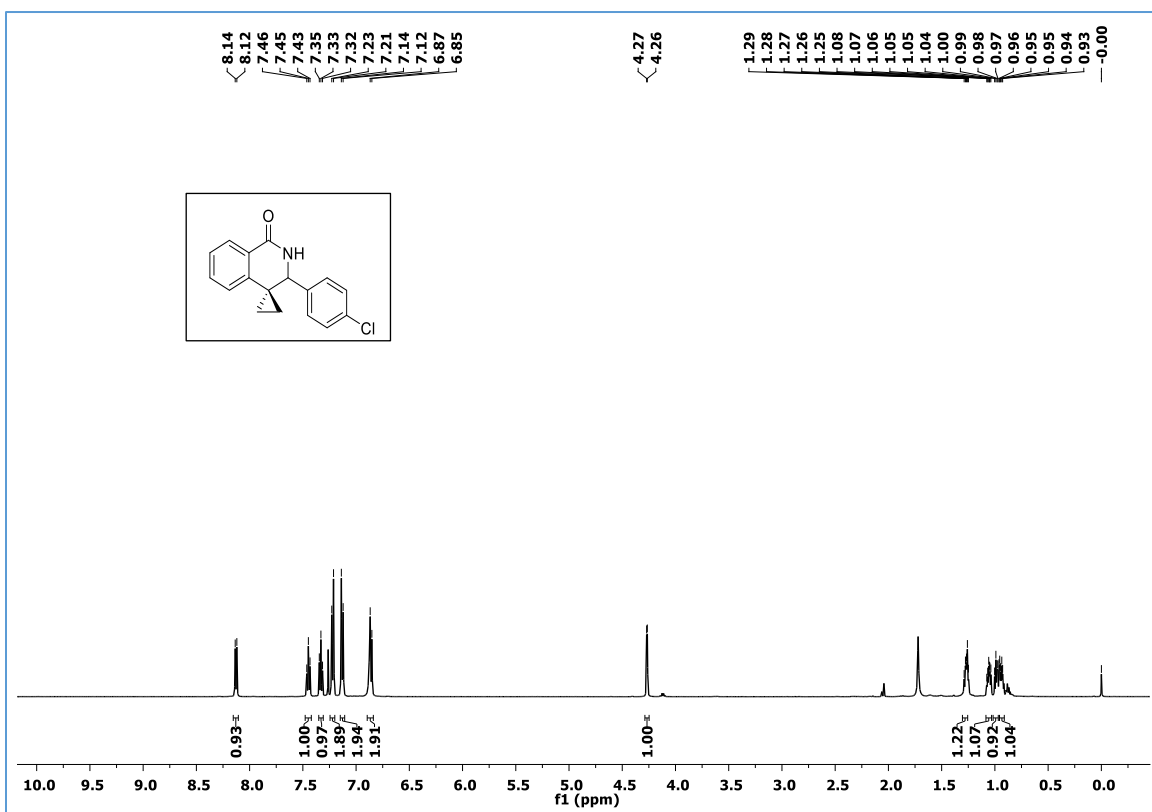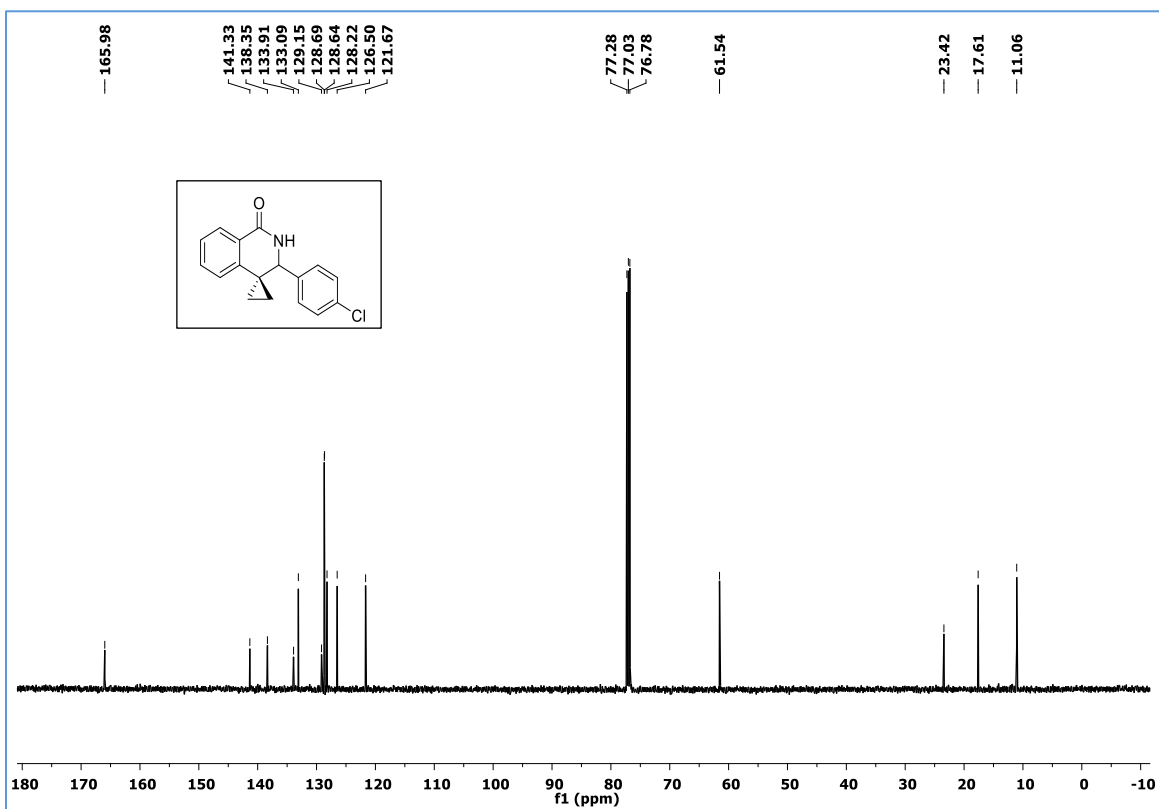

DEPT (135) NMR Spectrum of Compound **3ad**.

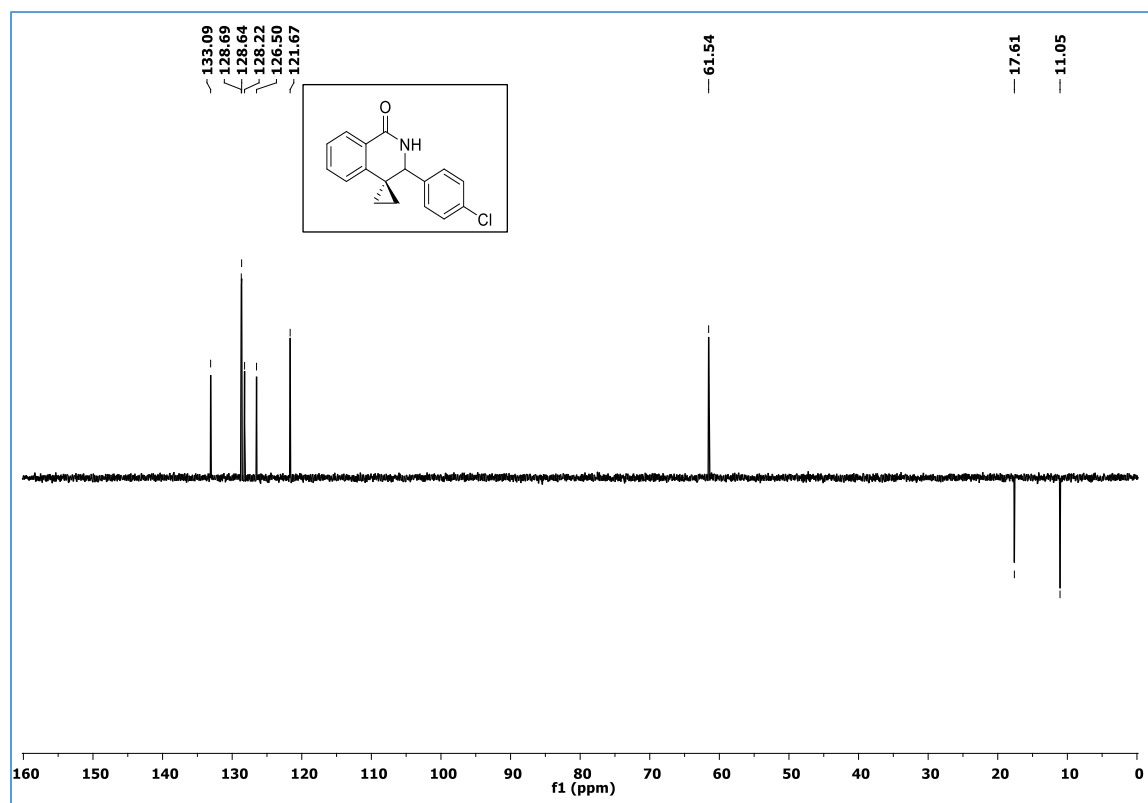



$^1\text{H}$  and  $^{13}\text{C}$  NMR Spectra of Compound **3ae**.

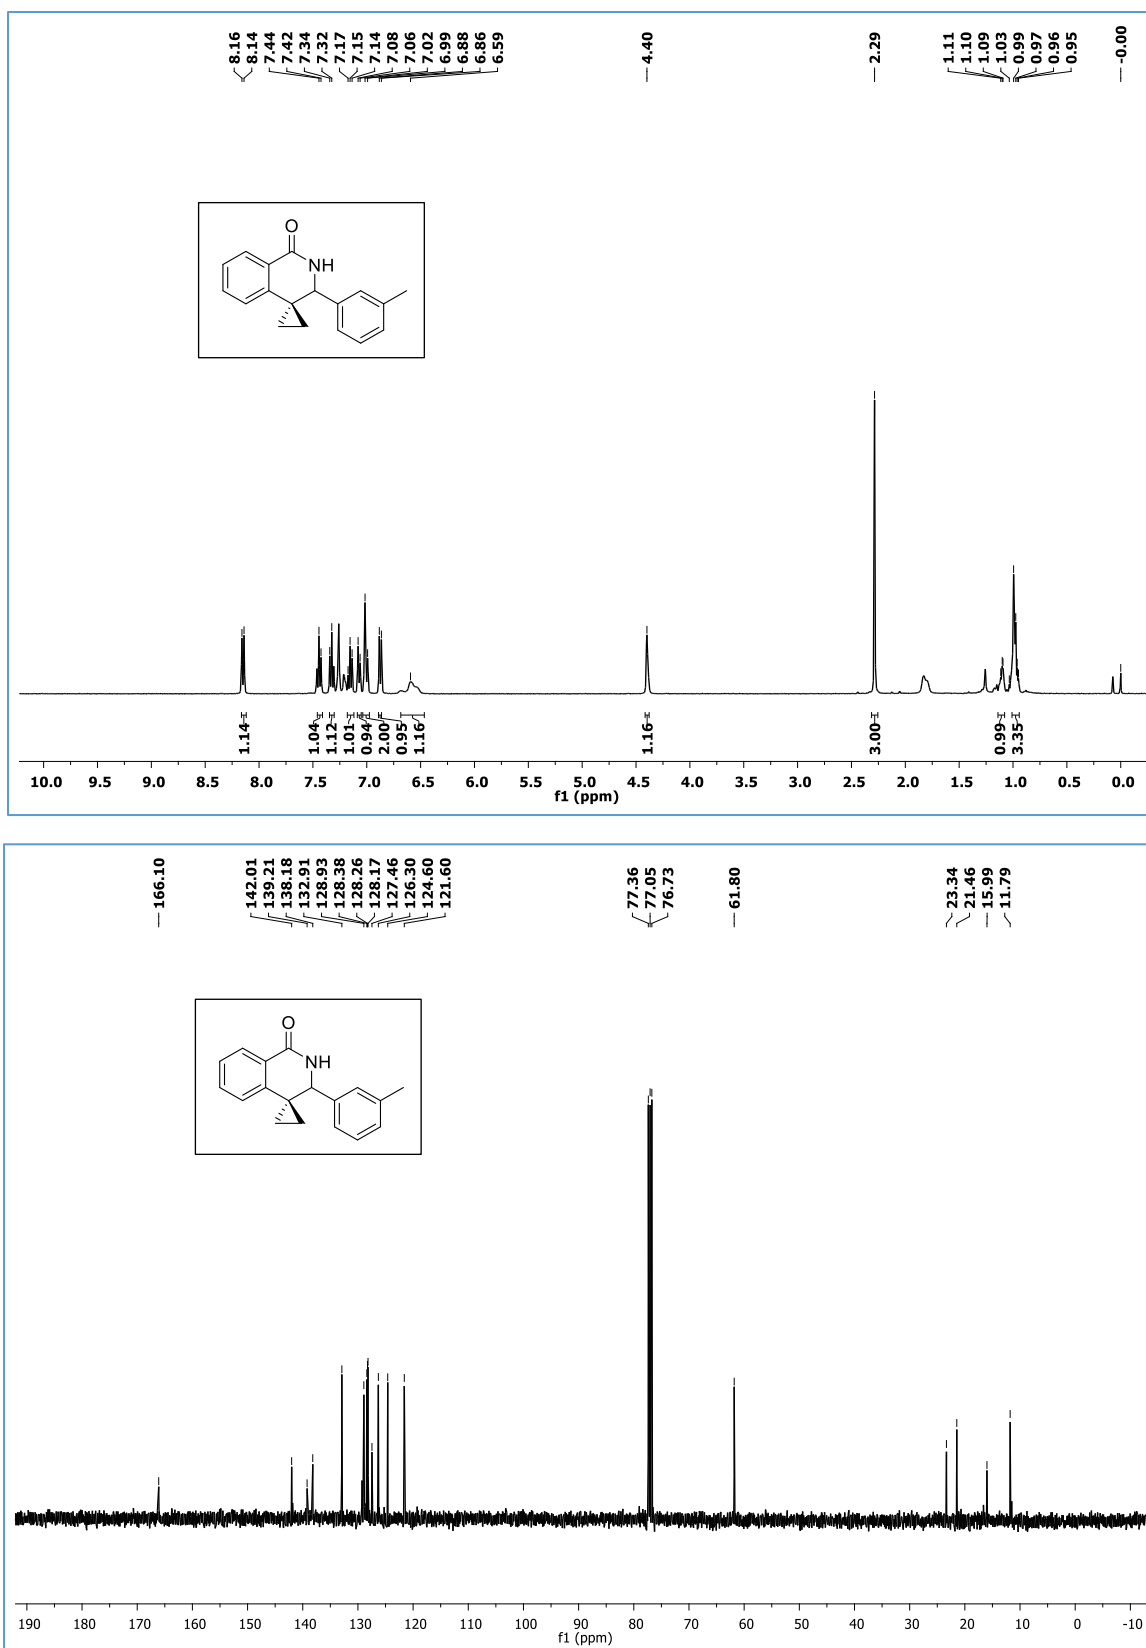

$^1\text{H}$  and  $^{13}\text{C}$  NMR Spectra of Compound **3af**.

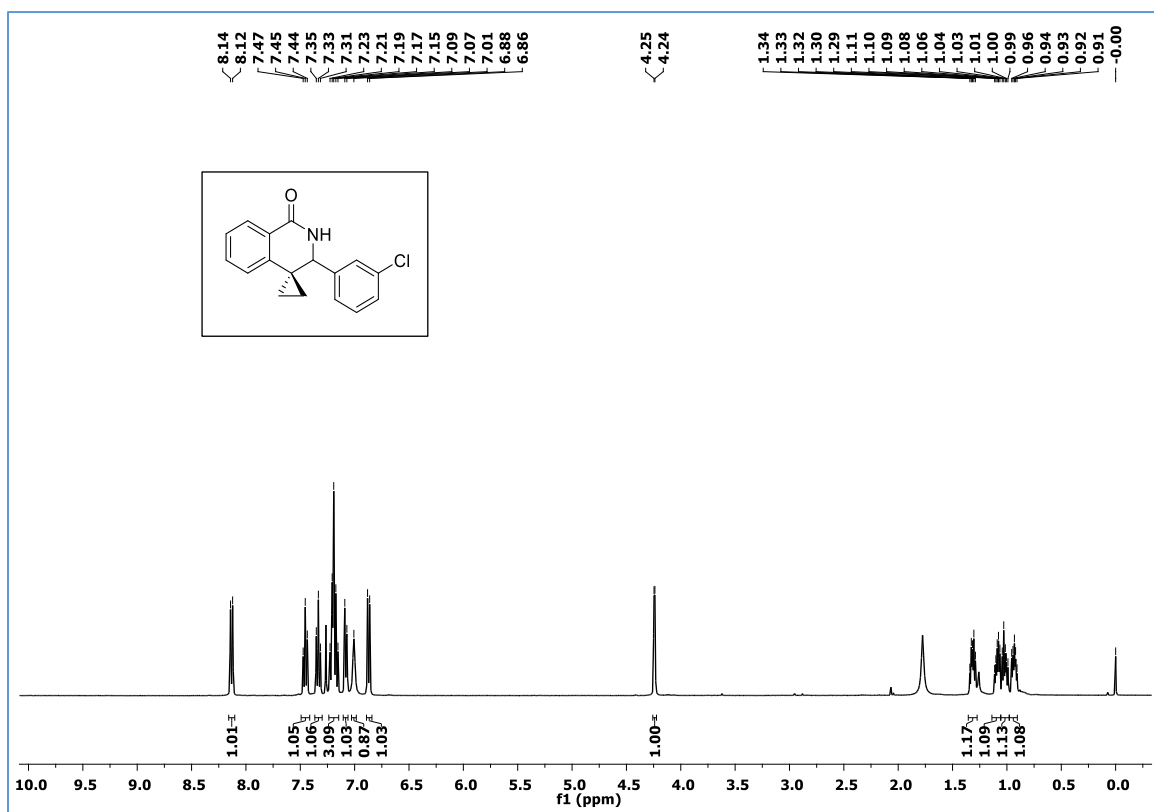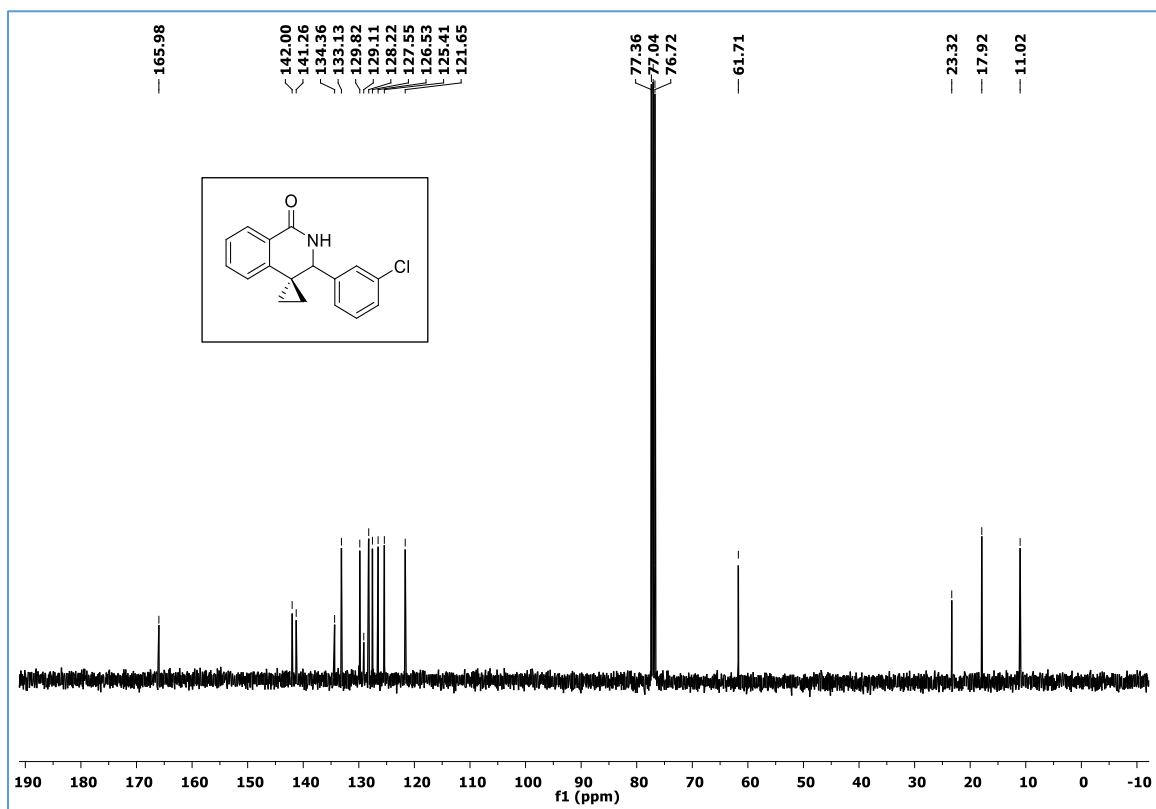

DEPT (135) NMR Spectrum of Compound **3af**.

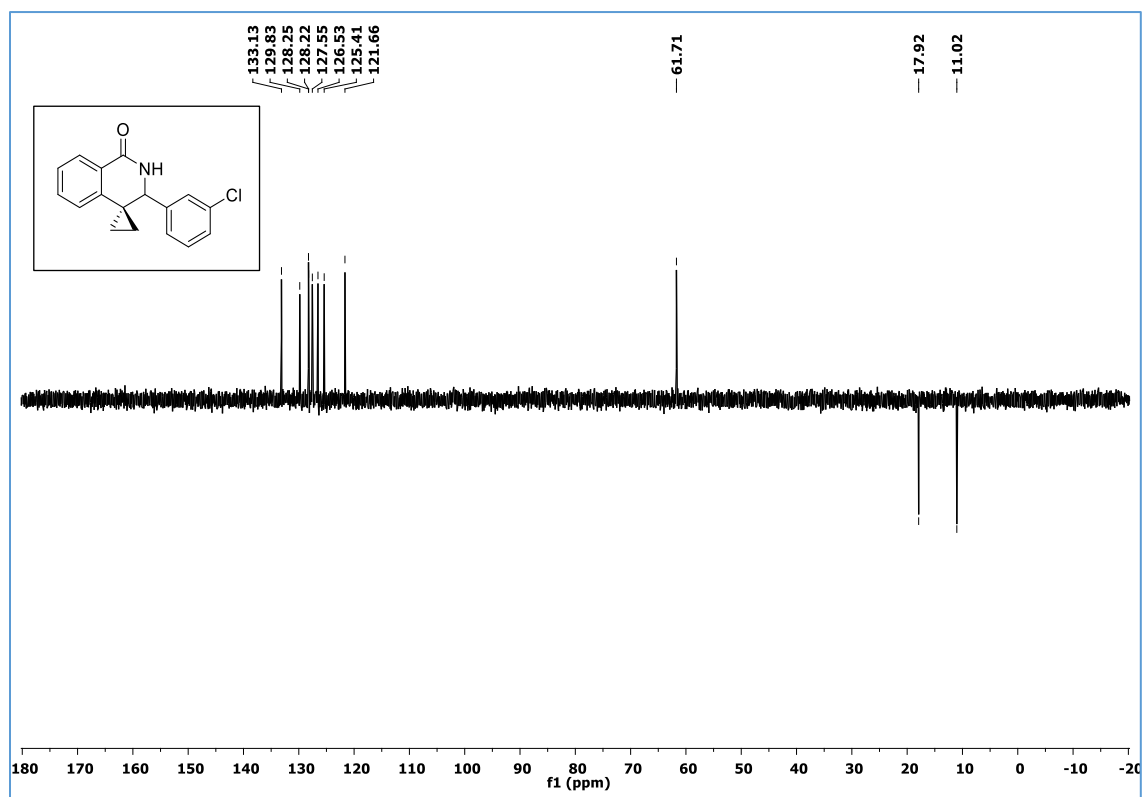

$^1\text{H}$  and  $^{13}\text{C}$  NMR Spectra of Compound **3ag**.

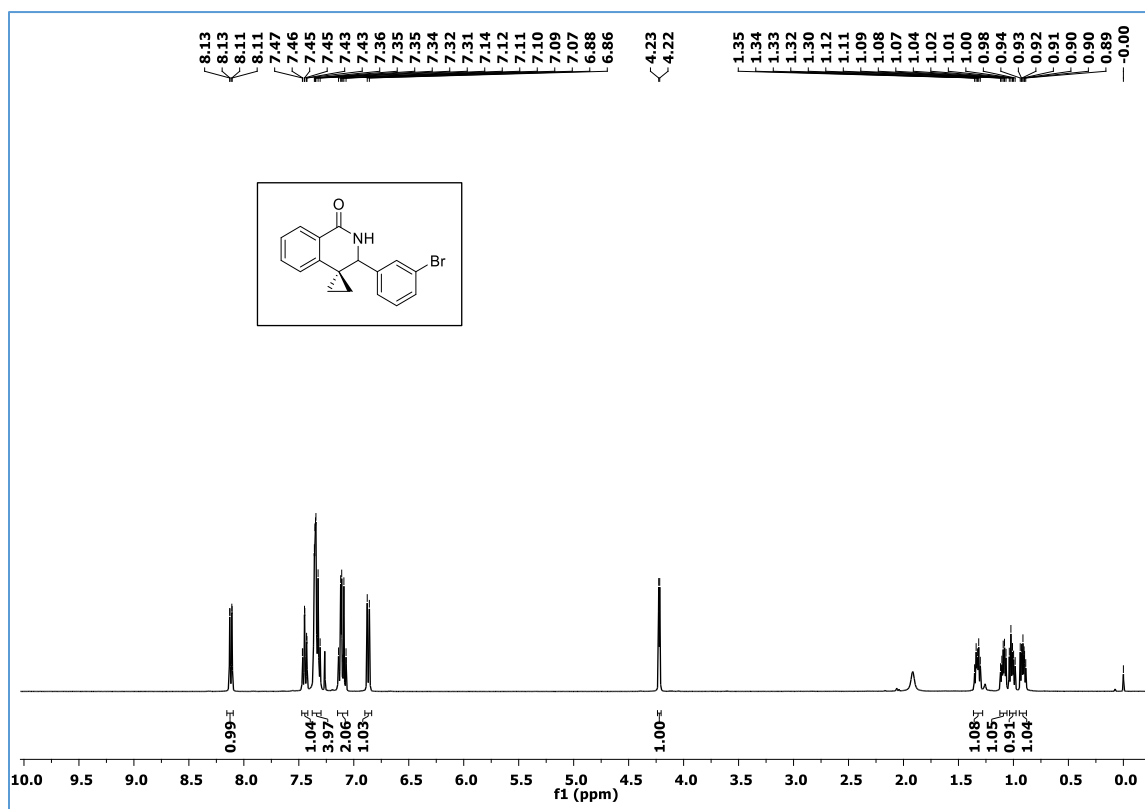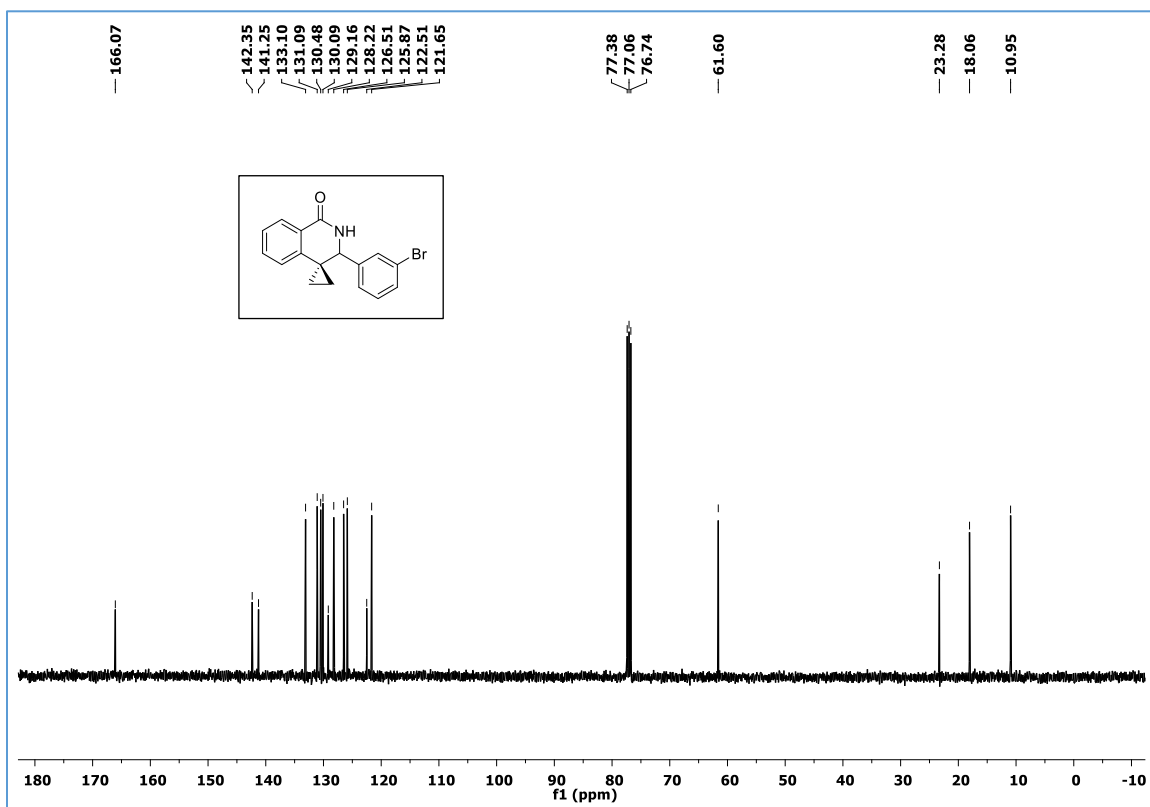

DEPT (135) NMR Spectrum of Compound **3ag**.

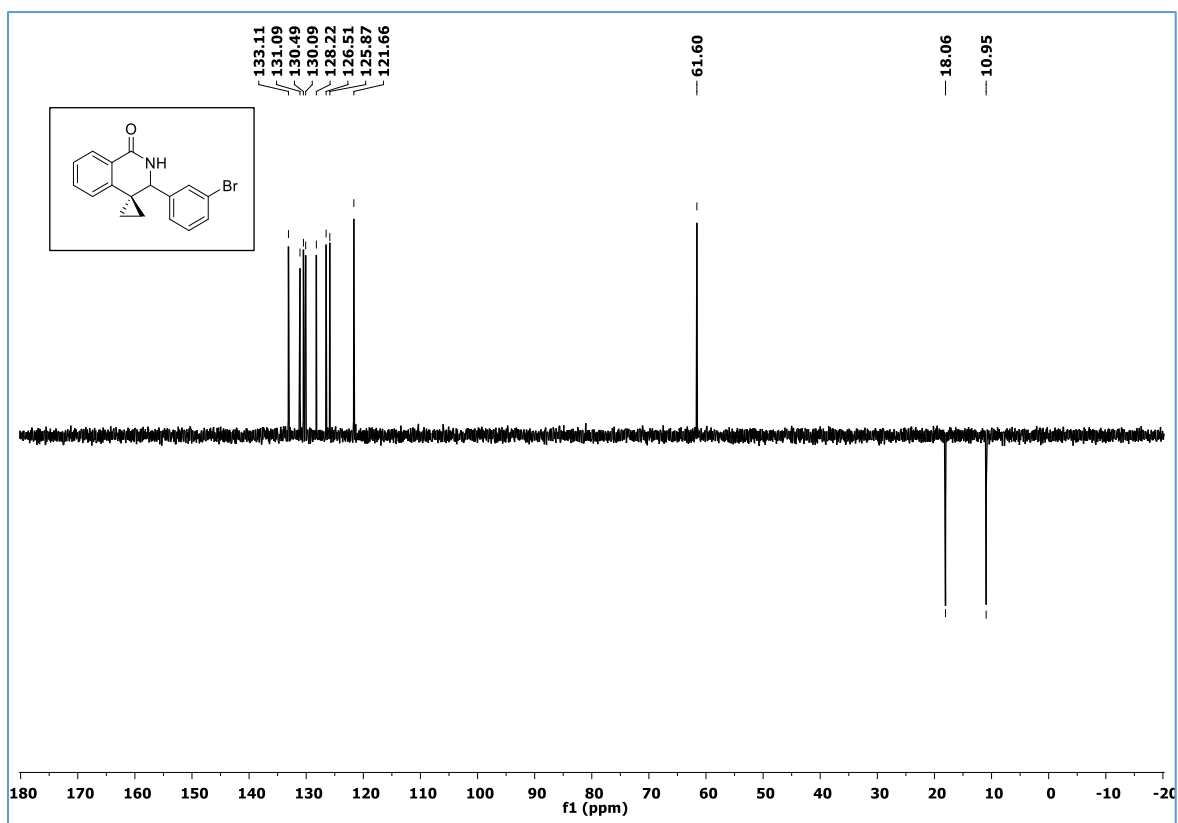

$^1\text{H}$  and  $^{13}\text{C}$  NMR Spectra of Compound **3ah**.

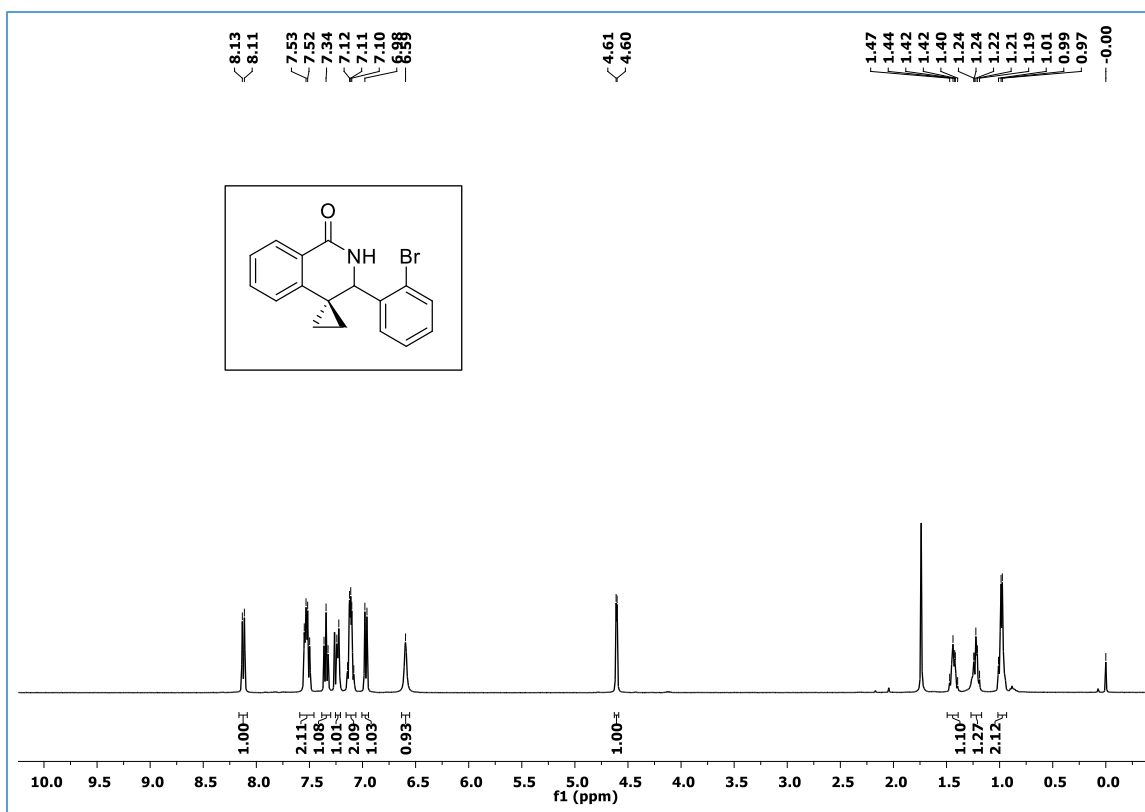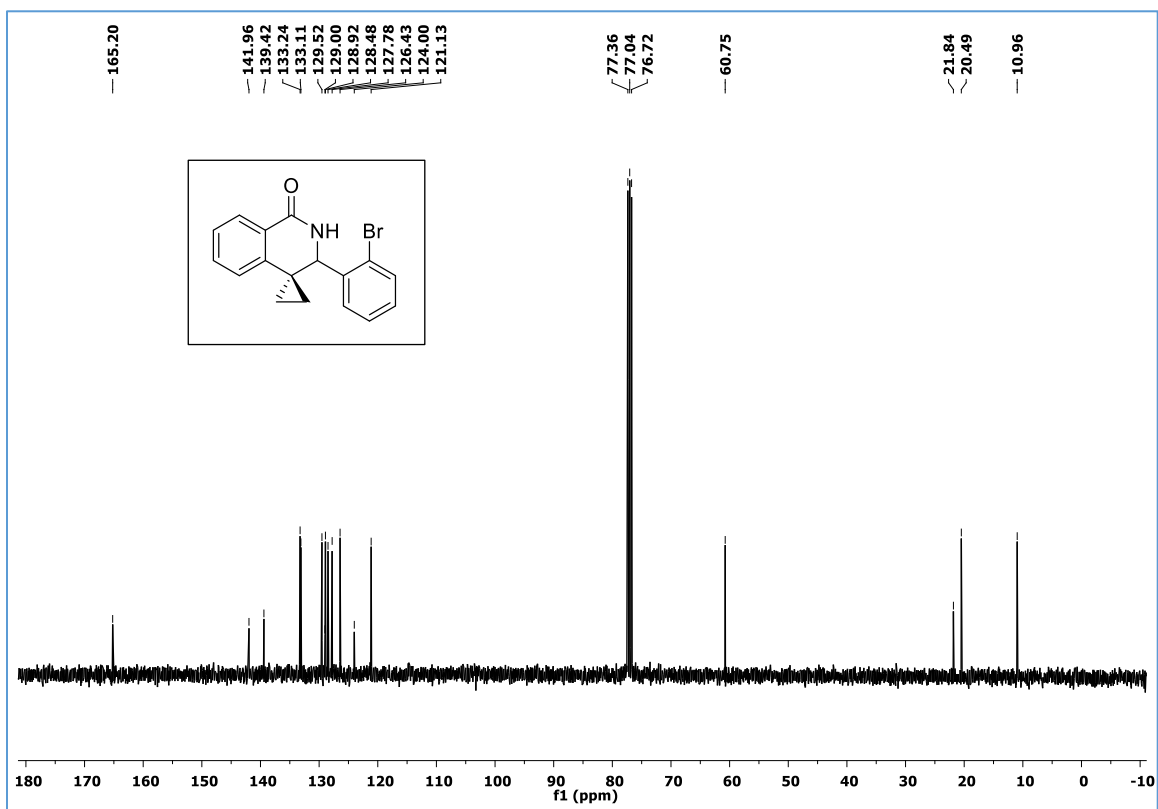

DEPT (135) NMR Spectrum of Compound **3ah**.

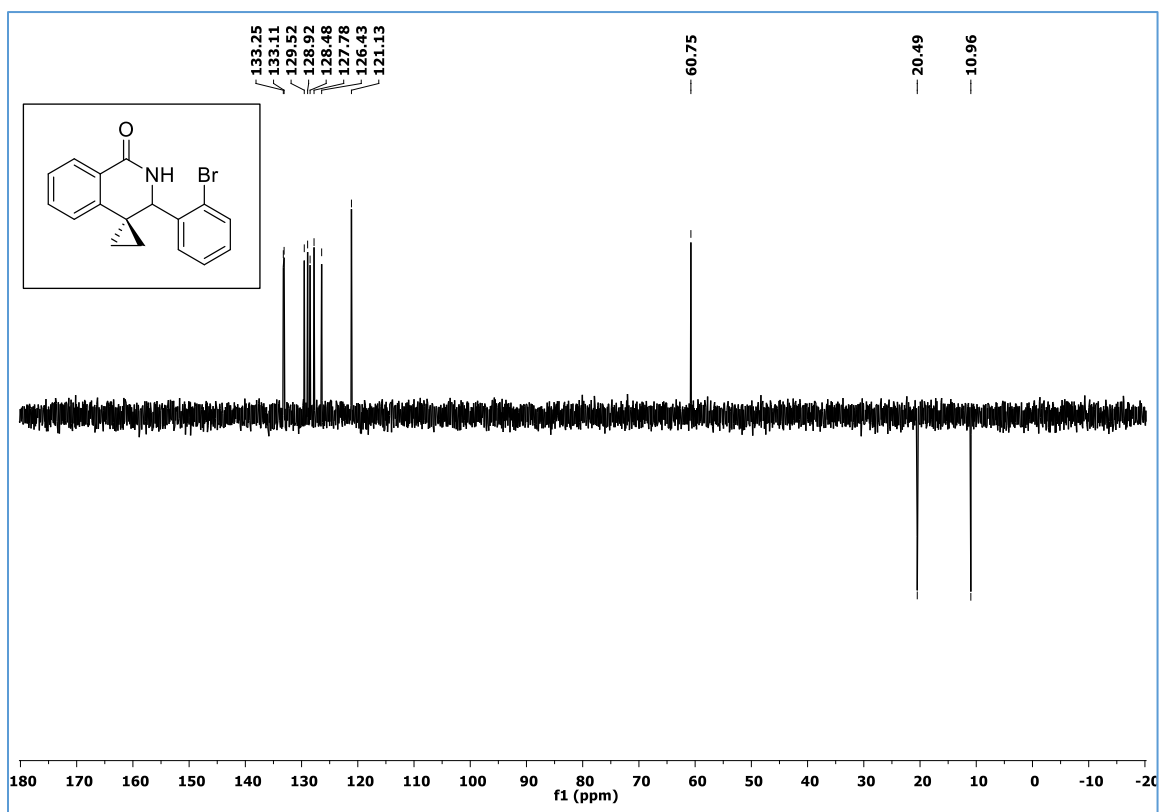

$^1\text{H}$  and  $^{13}\text{C}$  NMR Spectra of Compound **3ai**.

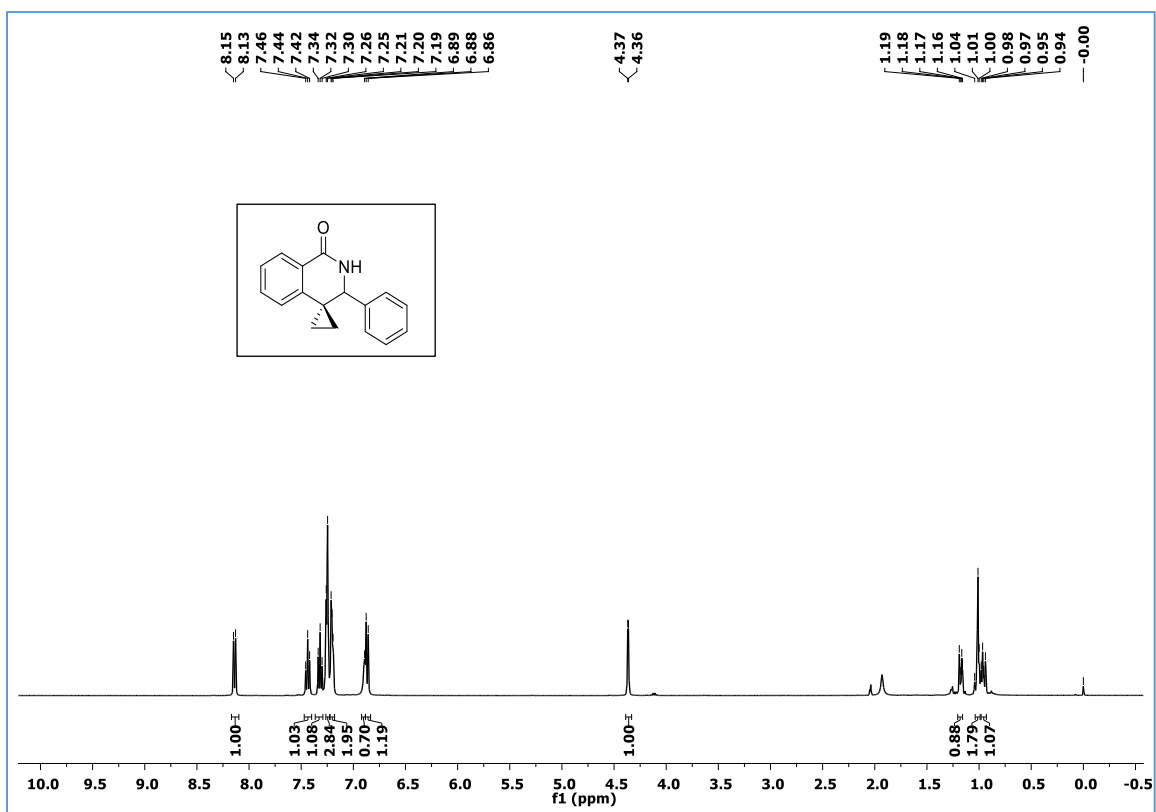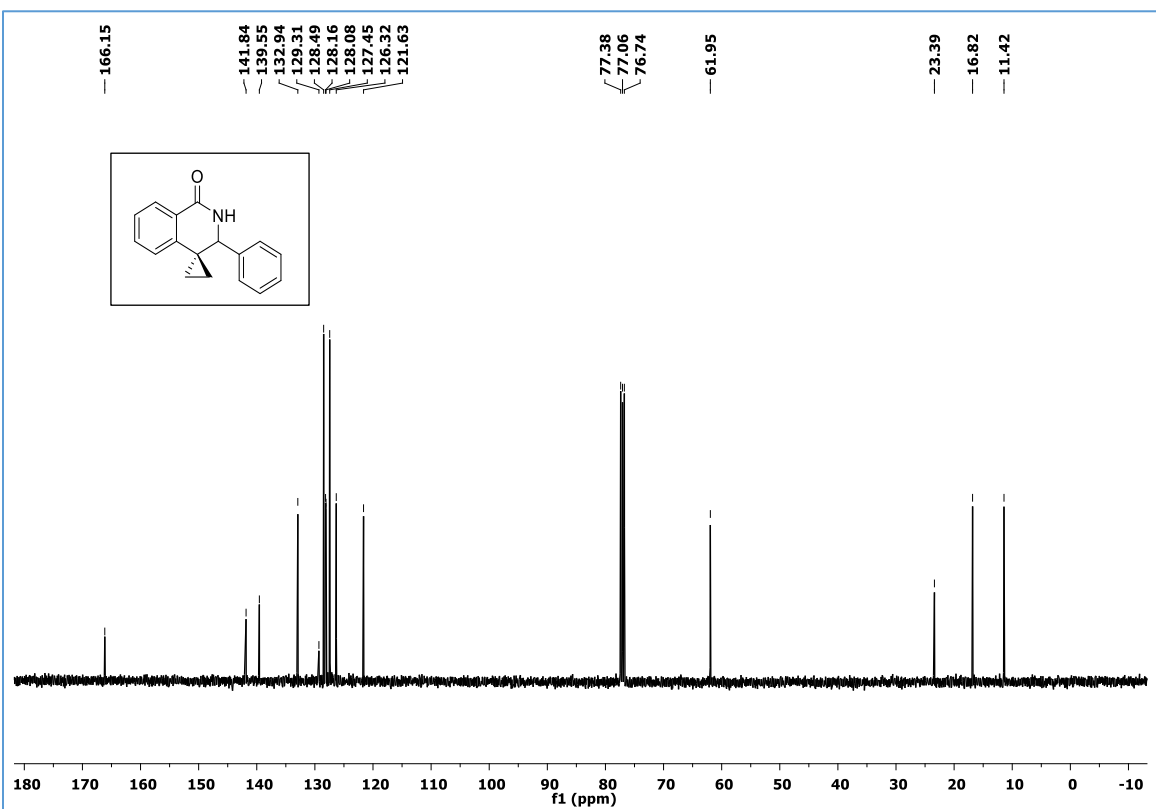



DEPT (135) NMR Spectrum of Compound **3ai**.

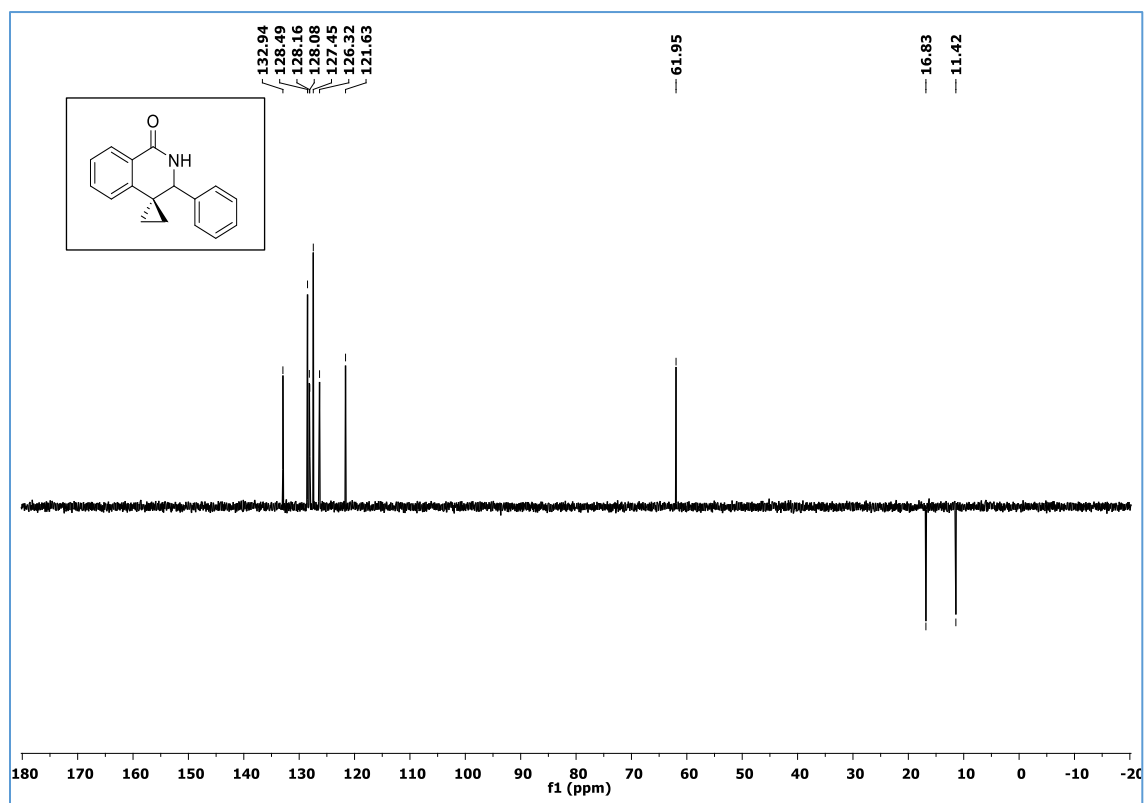

$^1\text{H}$  and  $^{13}\text{C}$  NMR Spectra of Compound **5aa**.

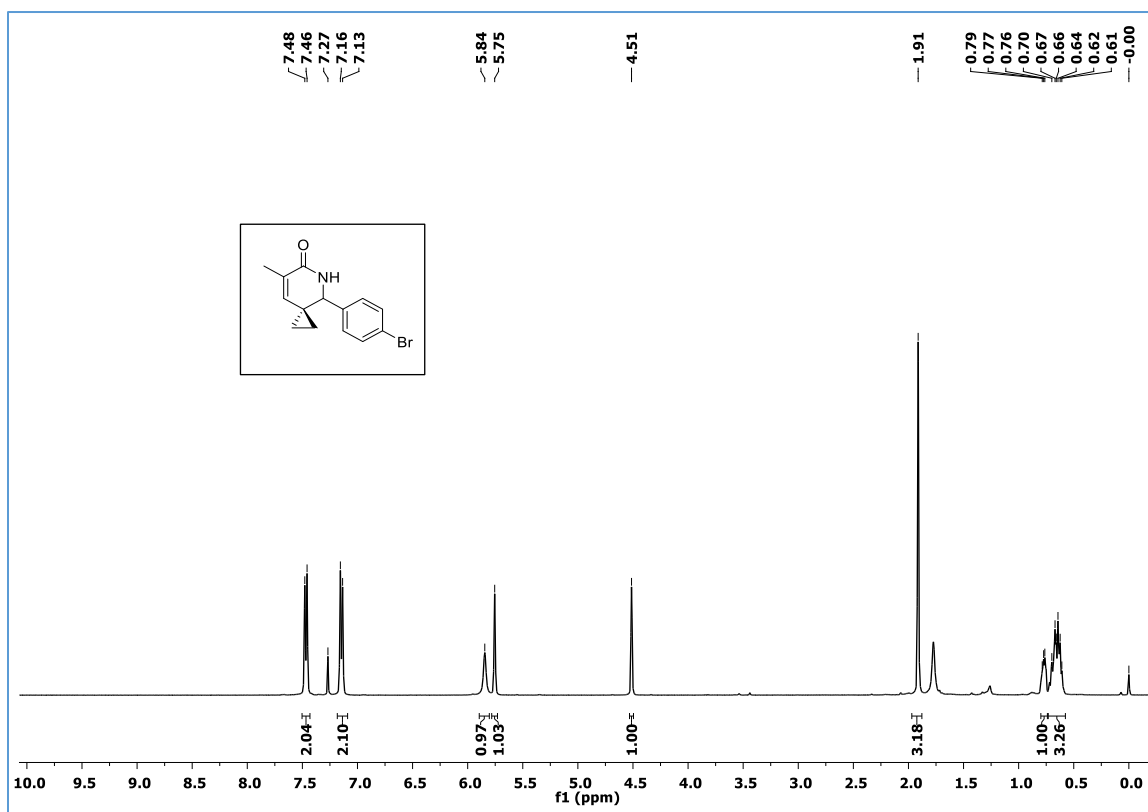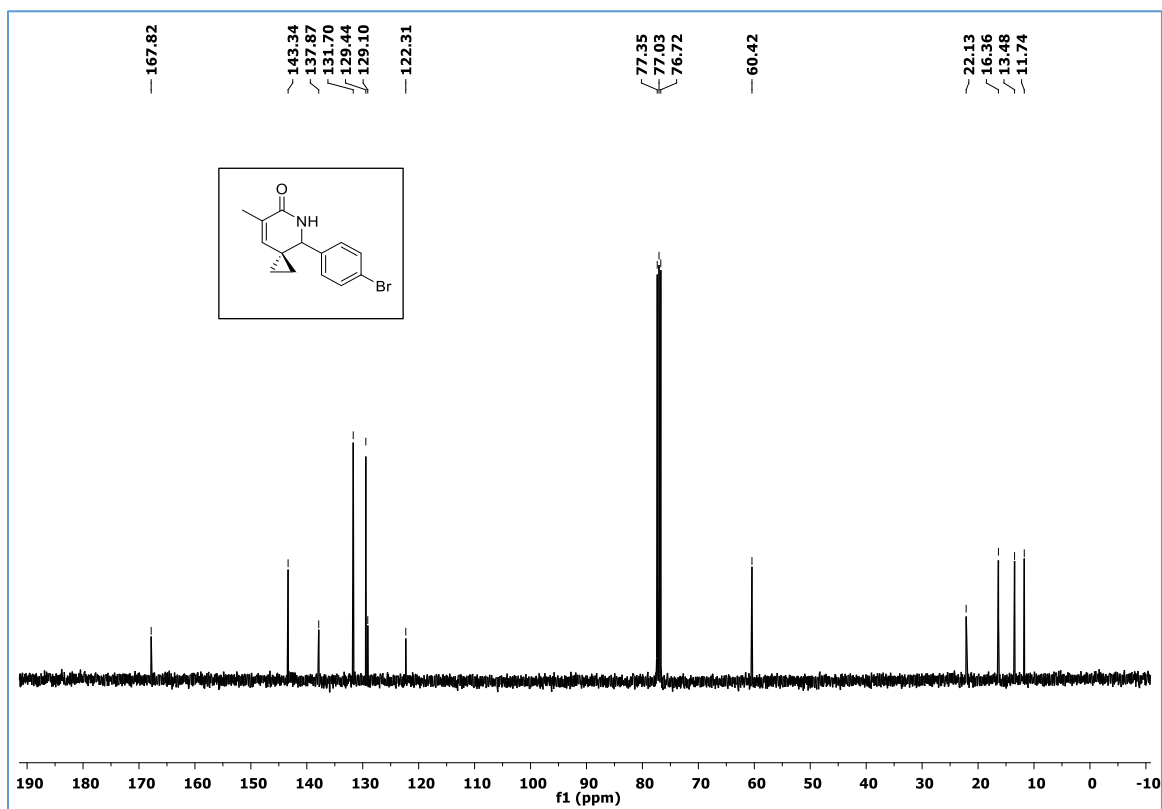

DEPT (135) NMR Spectrum of Compound **5aa**.

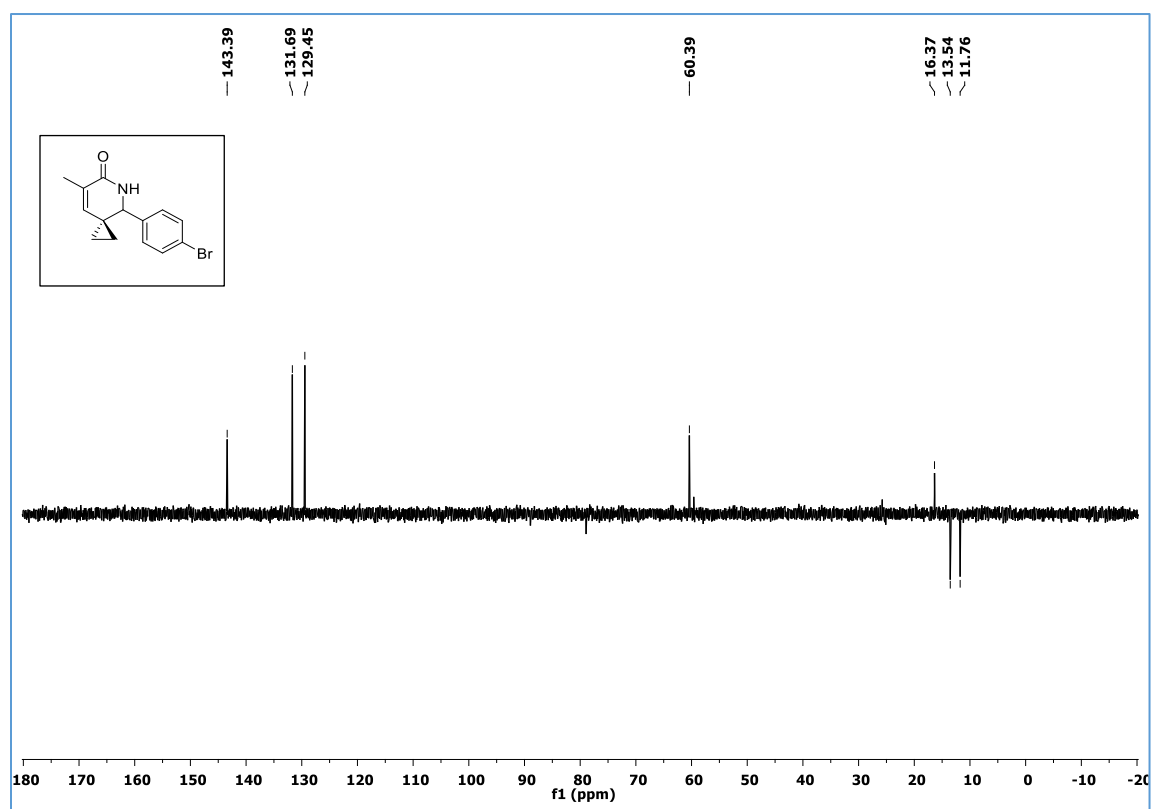

$^1\text{H}$  and  $^{13}\text{C}$  NMR Spectra of Compound **5ab**.

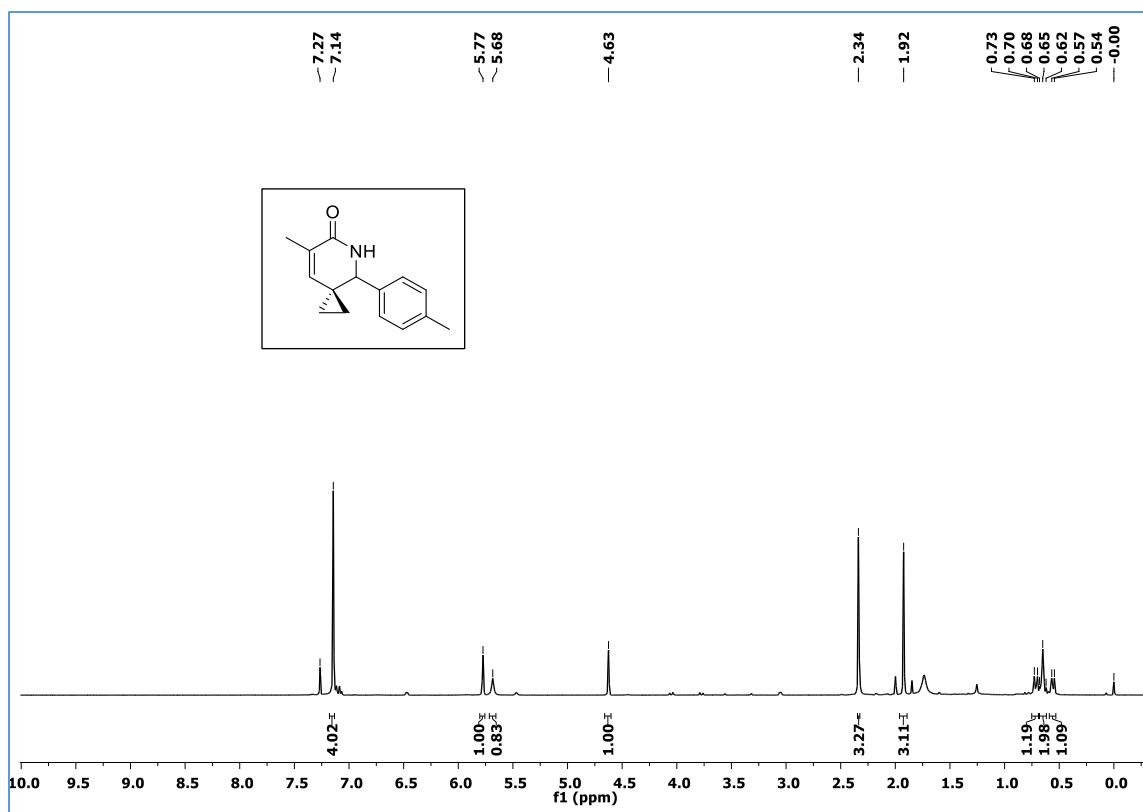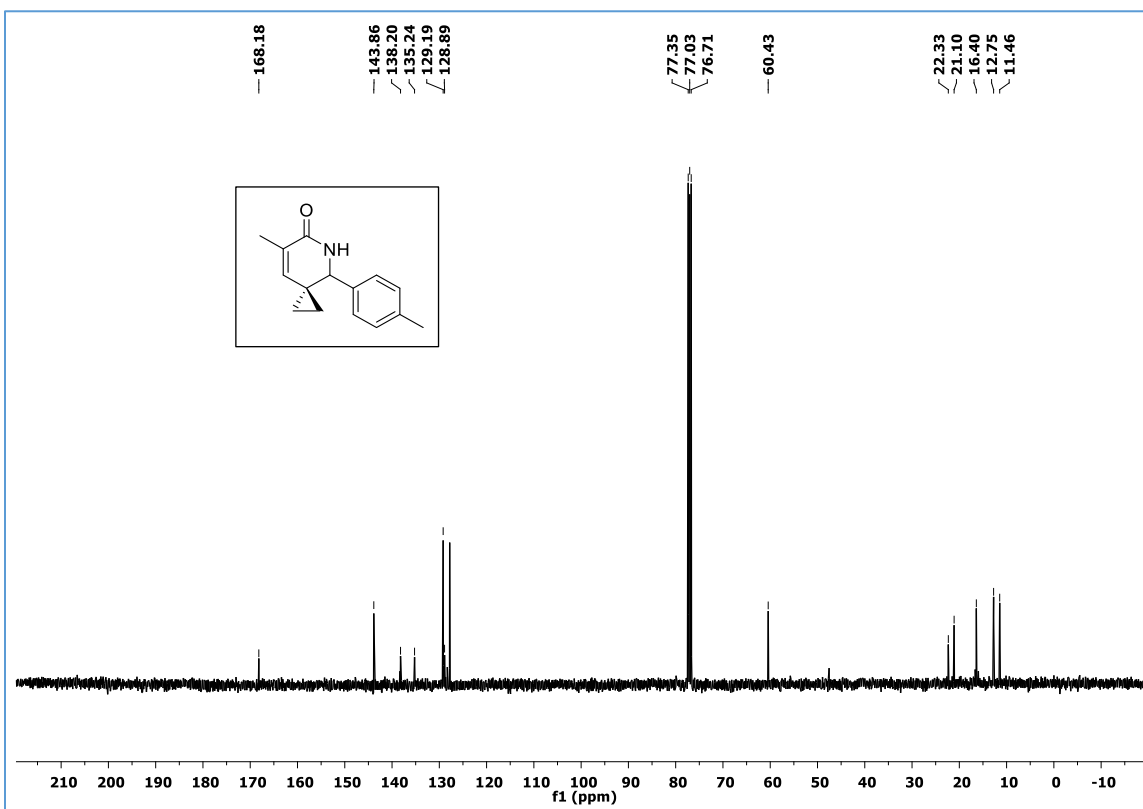

DEPT (135) NMR Spectrum of Compound **5ab**.

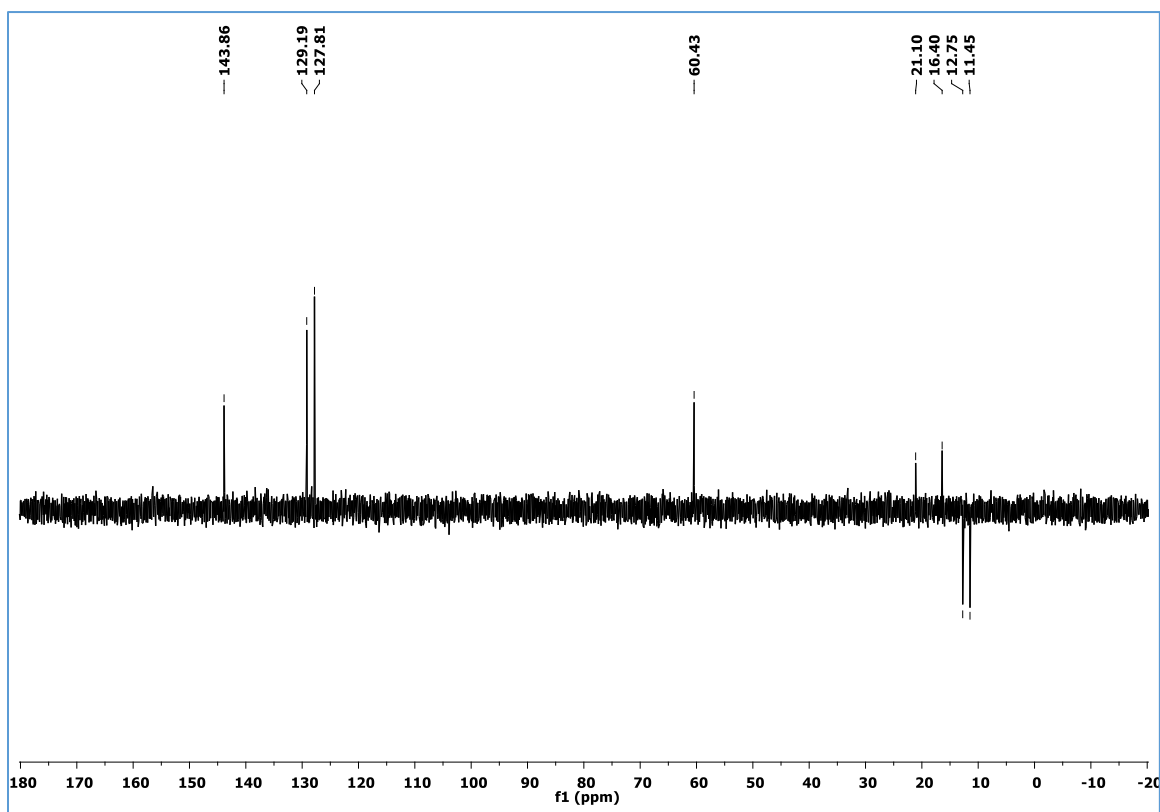

$^1\text{H}$  and  $^{13}\text{C}$  NMR Spectra of Compound **5ae**.

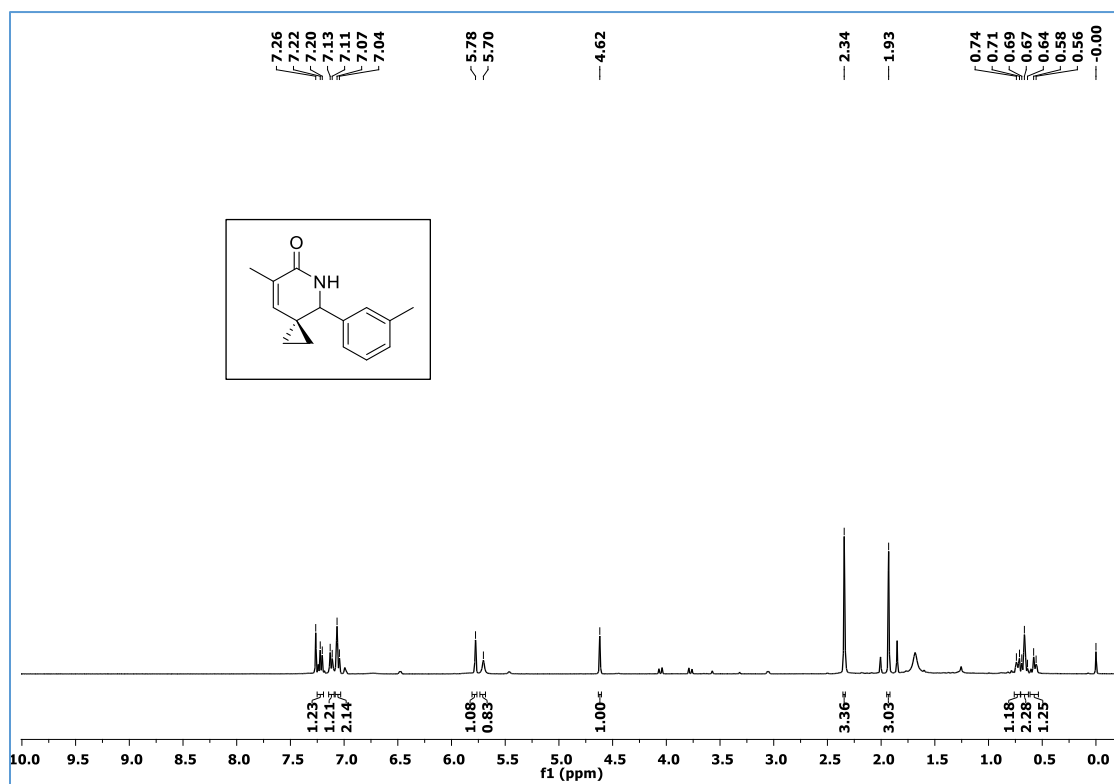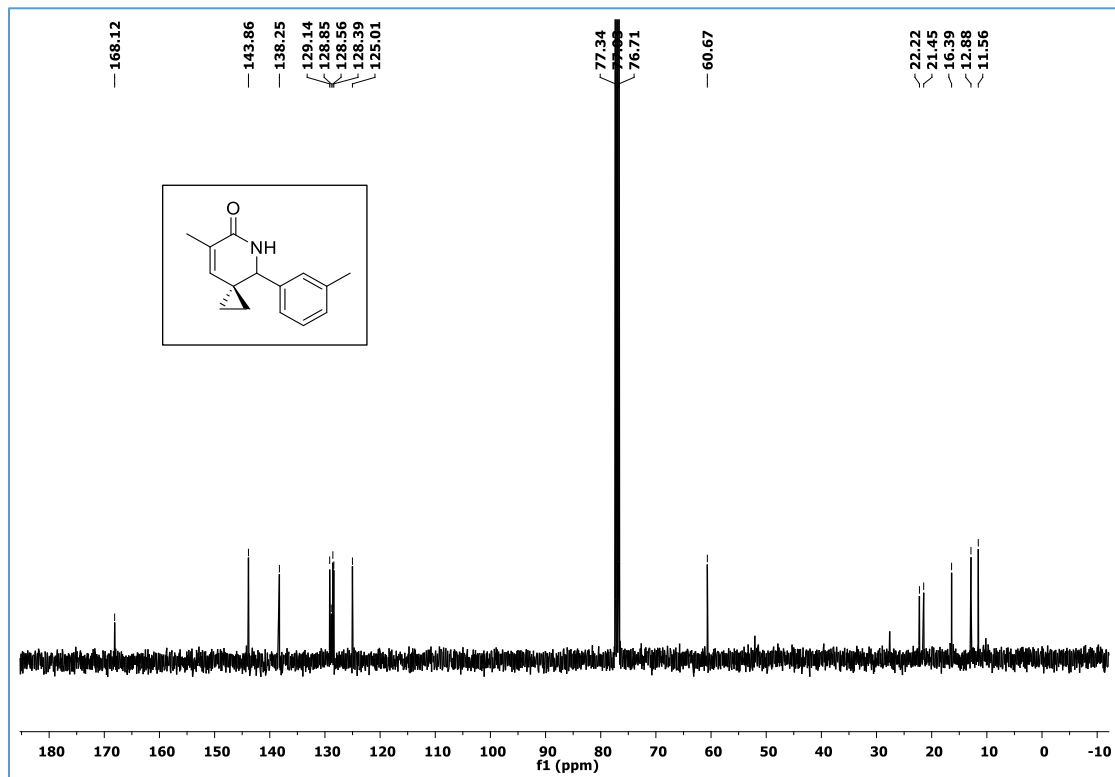

$^1\text{H}$  and  $^{13}\text{C}$  NMR Spectra of Compound **5ai**.

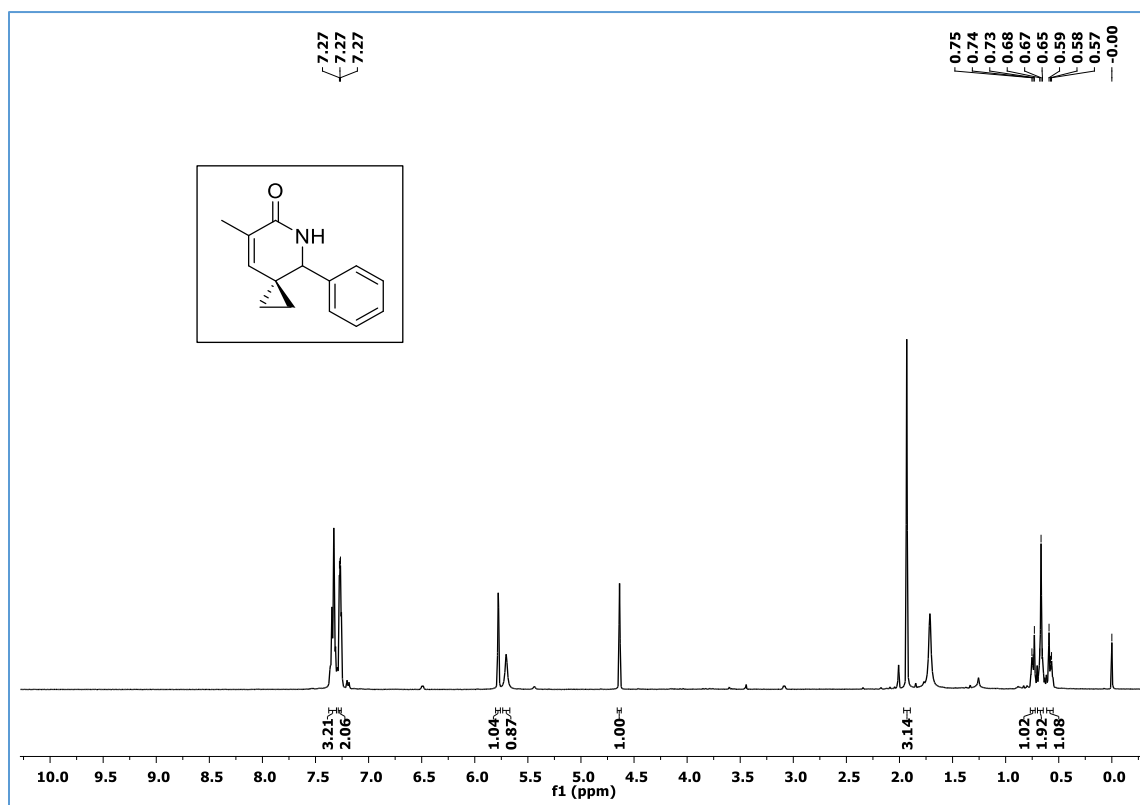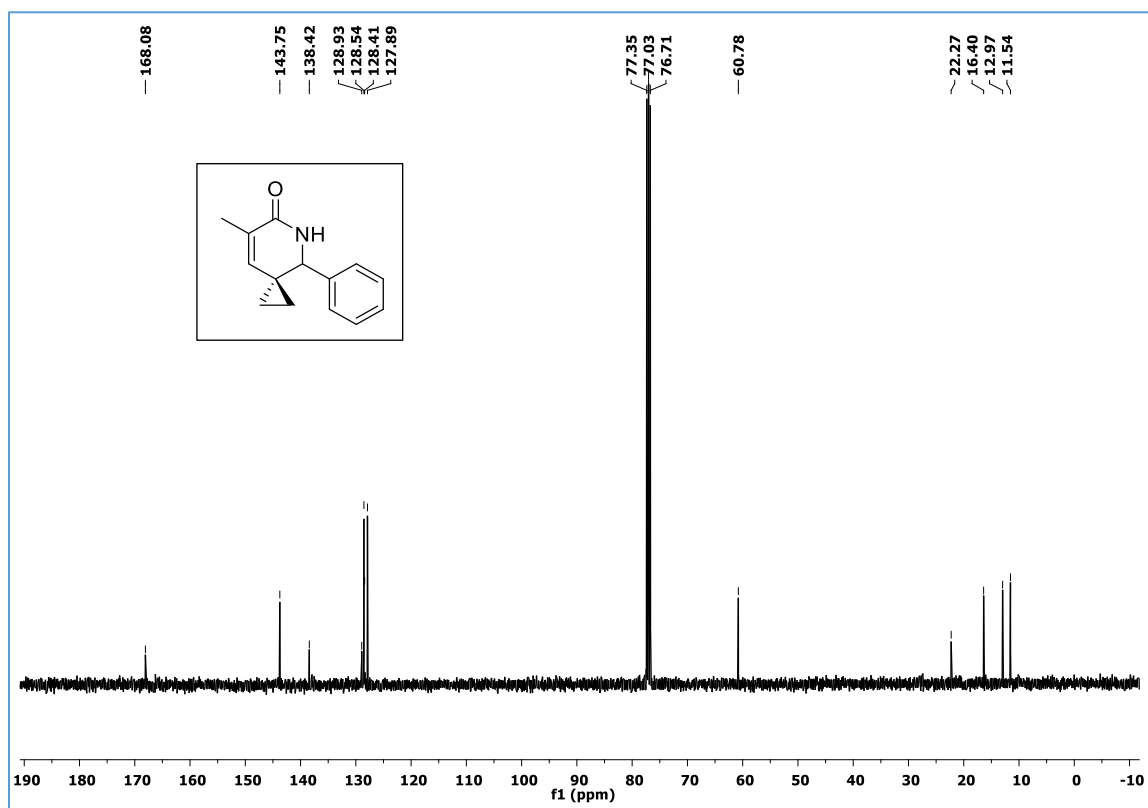

DEPT (135) NMR Spectrum of Compound **5ai**.

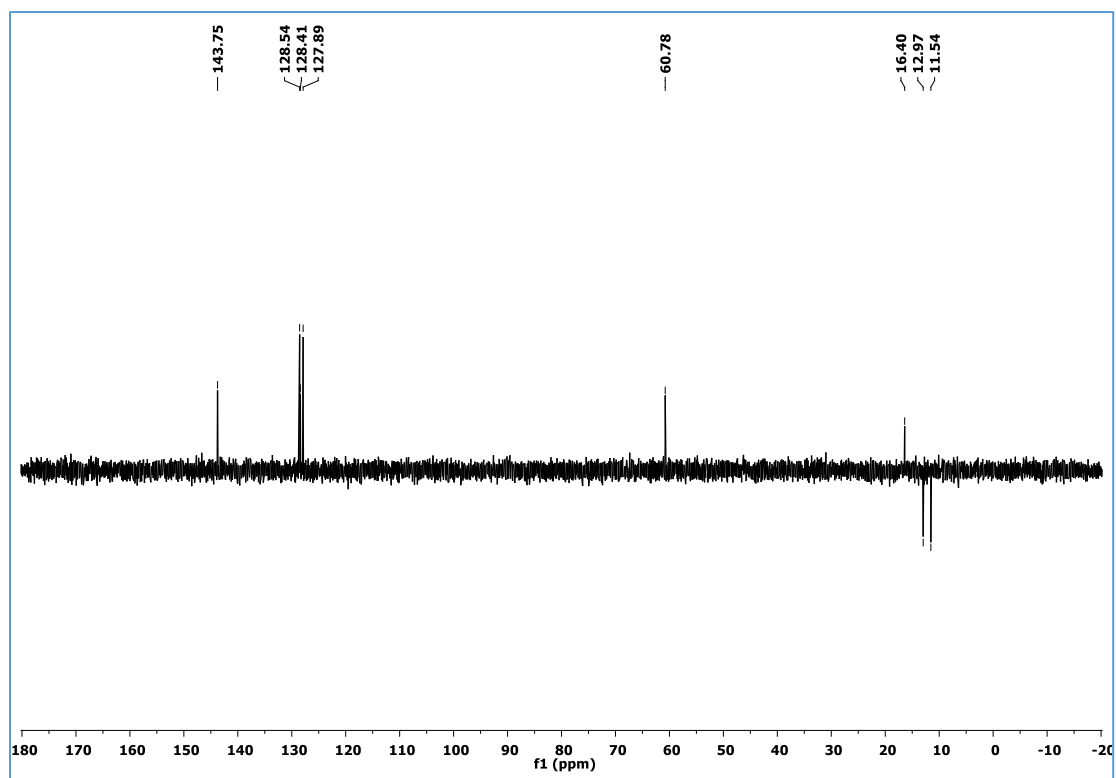



# <sup>1</sup>H and <sup>13</sup>C NMR Spectra of Compound 6.

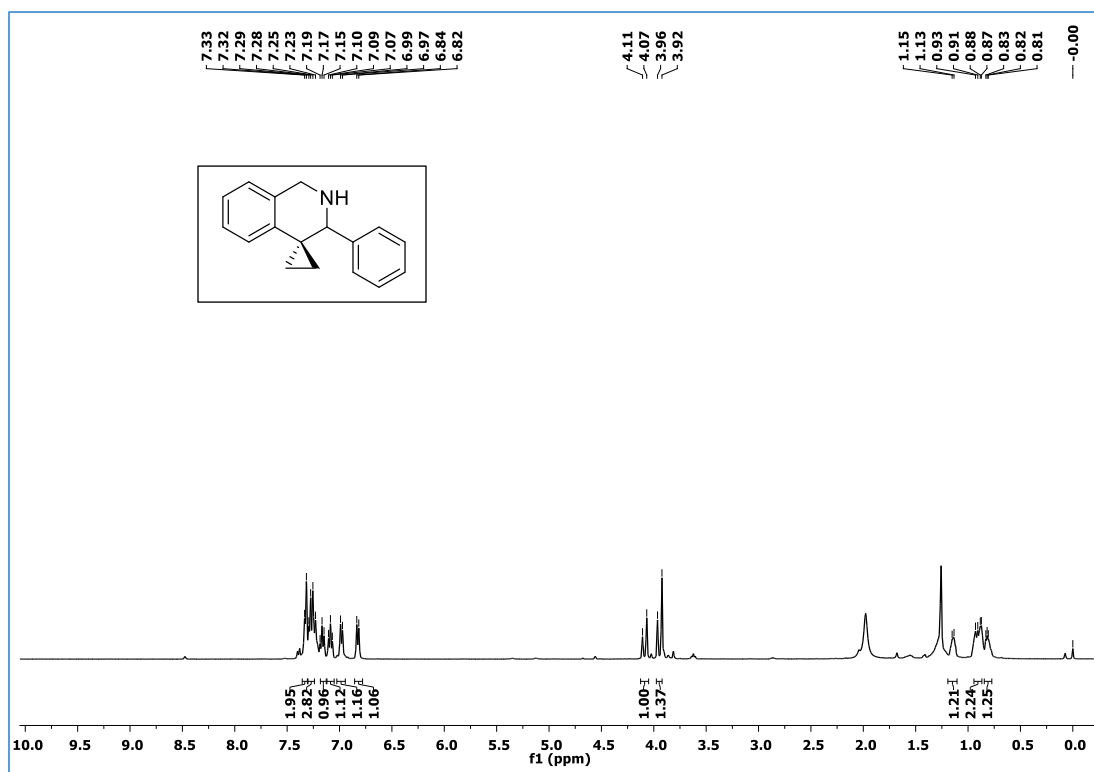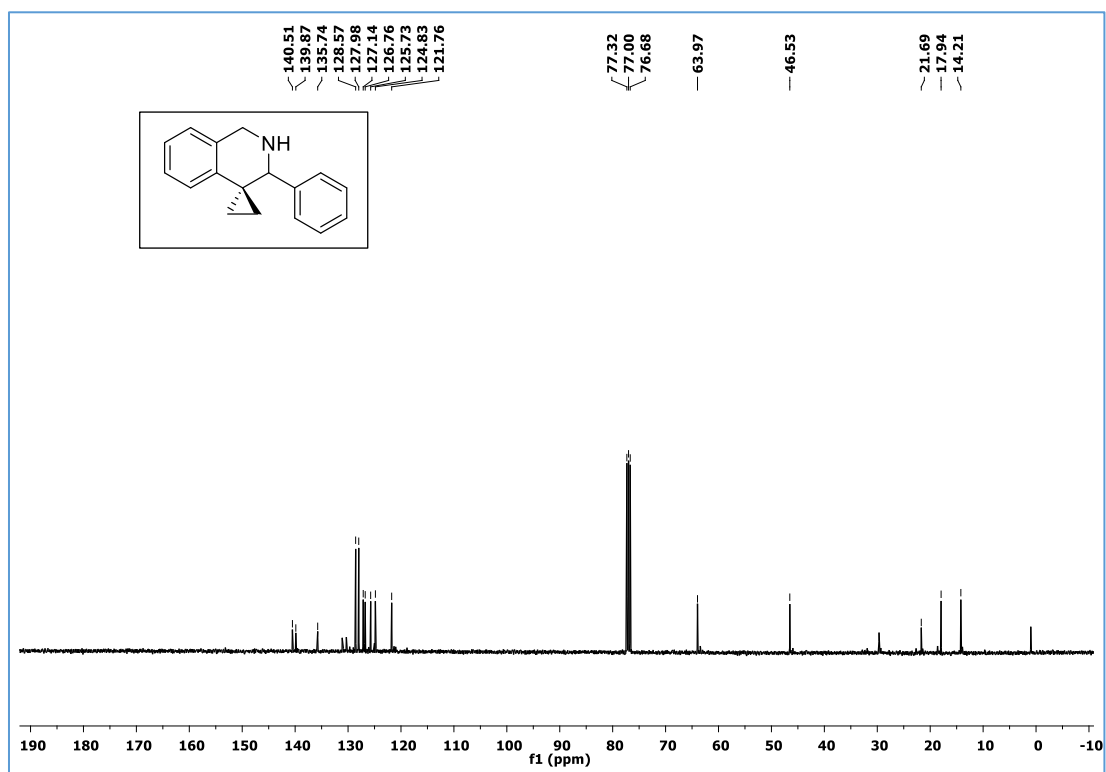

$^1\text{H}$  and  $^{13}\text{C}$  NMR Spectra of Compound **7aa**.

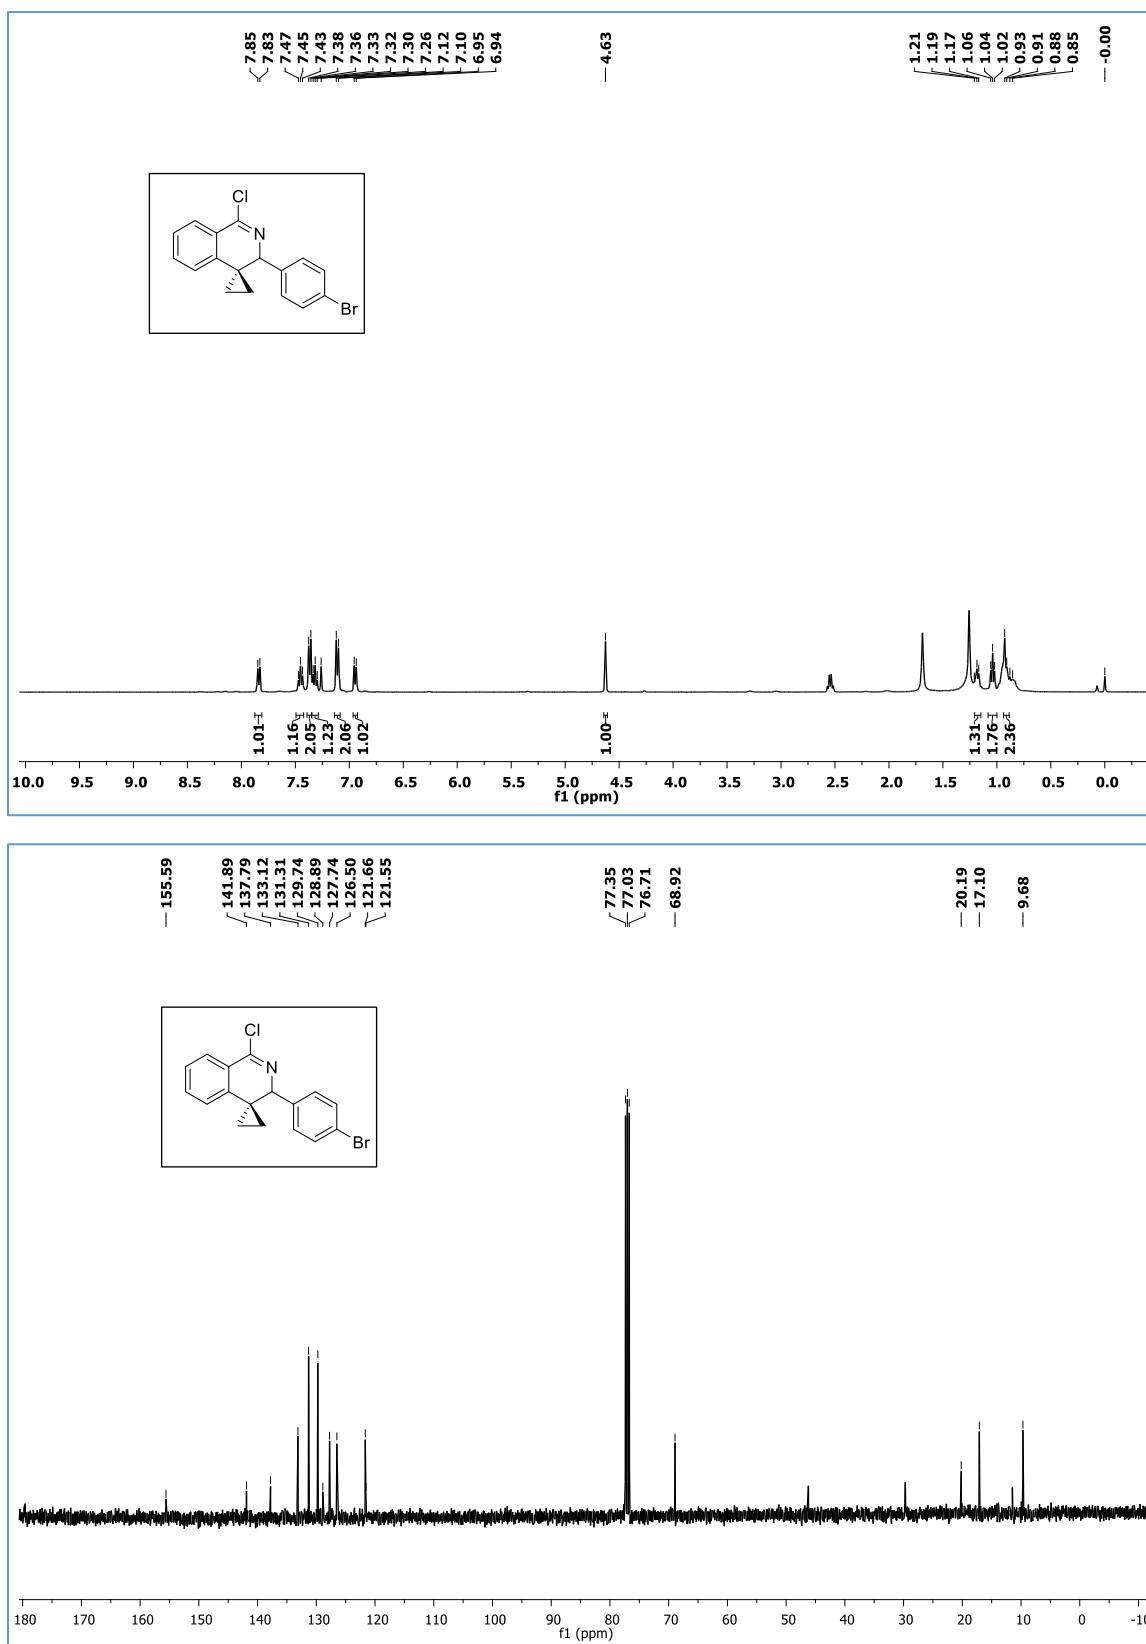

$^1\text{H}$  and  $^{13}\text{C}$  NMR Spectra of Compound **7af**.

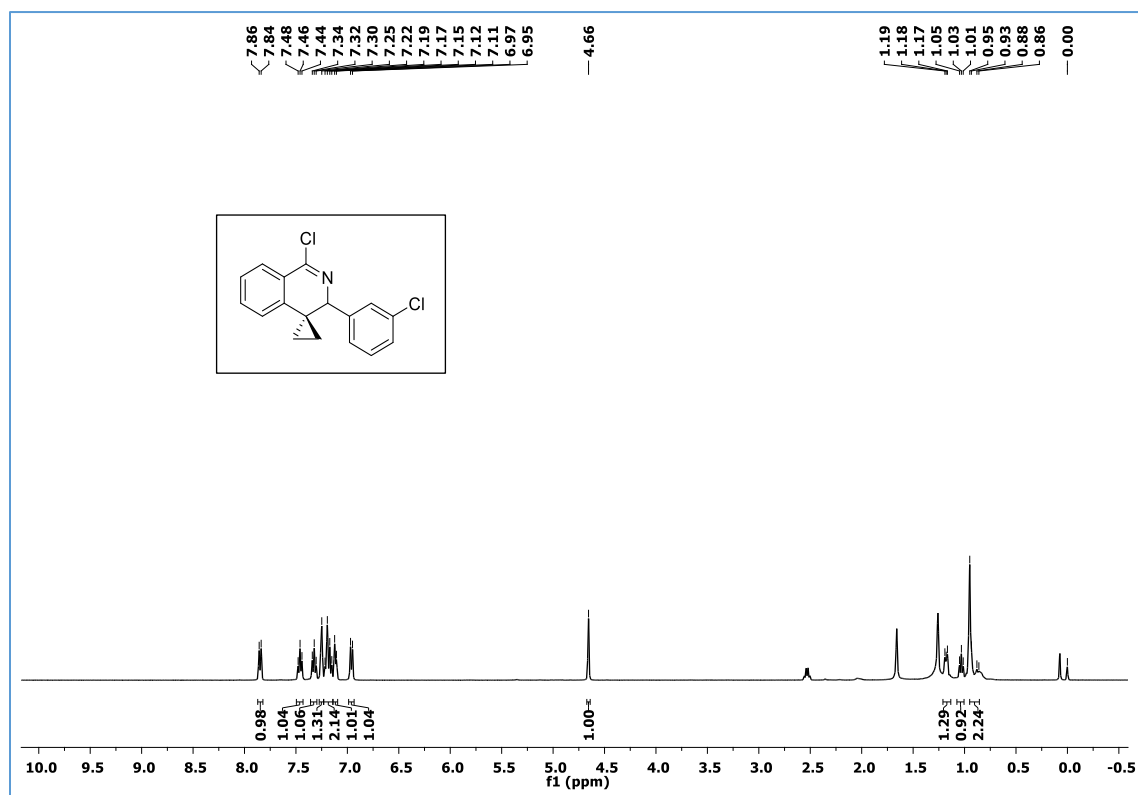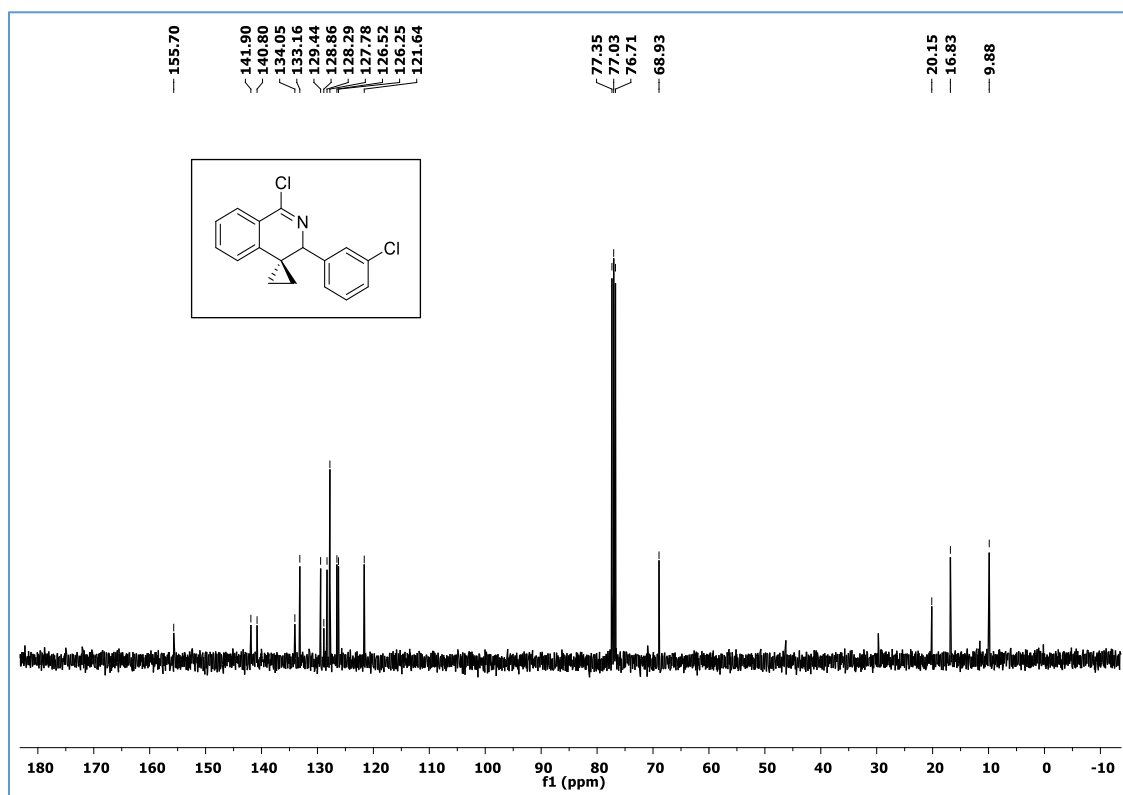

Supplement: d1cc00654a1.pdf [file d1cc00654a1.pdf]
